# Major stages of vertebrate adaptive radiation are assembled from a disparate spatiotemporal landscape

**Authors:** Emilie J. Richards<sup>1,2</sup>, Joseph A. McGirr<sup>3</sup>, Jeremy R. Wang<sup>4</sup>, Michelle E. St. John<sup>1,2</sup>, Jelmer W. Poelstra<sup>5</sup>, Maria J. Solano<sup>3</sup>, Delaney C. O’Connell<sup>3</sup>, Bruce J. Turner<sup>6</sup>, Christopher H. Martin<sup>1,2\*</sup>

## **Affiliations:**

<sup>1</sup>Department of Integrative Biology, University of California, Berkeley, CA

<sup>2</sup>Museum of Vertebrate Zoology, University of California, Berkeley, CA

<sup>3</sup>Department of Biology, University of North Carolina, Chapel Hill, NC

<sup>4</sup>Department of Genetics, University of North Carolina, Chapel Hill, NC

<sup>5</sup>Department of Biology, Duke University, Durham, NC

<sup>6</sup>Department of Biological Sciences, Virginia Tech, VA

\*Correspondence to: [chmartin@berkeley.edu](mailto:chmartin@berkeley.edu)

**Abstract:** To investigate the origins and stages of vertebrate adaptive radiation, we reconstructed the spatial and temporal histories of genetic variants underlying major phenotypic axes of diversification from the genomes of 202 Caribbean pupfishes. Ancient standing variation from disparate spatial sources was reassembled into new combinations which are under strong selection for adaptation to novel trophic niches on only a single island throughout the Caribbean. This occurred in three stages: first, standing variation associated with feeding behavior swept, then standing variation regulating craniofacial development and pigmentation, and finally de novo variation for craniofacial development. Our results provide clear support for two longstanding hypotheses about adaptive radiation and demonstrate how ancient alleles maintained for millennia in distinct environmental refugia can be assembled into new adaptive combinations.

**One Sentence Summary:** Ancient origins of adaptive radiation

32 **Main Text:** Adaptive radiations are fundamental to understanding the biodiversity of life. These  
33 bursts of phenotypic and ecological diversification may occur in response to ecological  
34 opportunity provided by unoccupied niche space (1, 2). However, the origins and major features  
35 of this process are still controversial. For example, ecological opportunity does not explain why  
36 only some lineages radiate (3–6). One hypothesis is that introgression from disparate source  
37 populations might be necessary to trigger diversification (7, 8). Despite substantial evidence of  
38 adaptive introgression during radiation (9–12), no previous studies have compared adaptive  
39 introgression between closely related radiating and non-radiating lineages to distinguish  
40 introgression as a trigger. A parallel debate centers on whether adaptive diversification proceeds  
41 in three distinct temporal stages: shifts in habitat preference first, followed by trophic  
42 morphology, and finally sexual communication (13). This ‘behavior-first’ view is also  
43 commonly proposed for initiating adaptive trait evolution (14–16). However, existing evidence  
44 for the temporal stages hypothesis comes from ancestral state reconstructions of rapidly  
45 diversifying traits which are unreliable without fossil data (17–19).

46 Here we provide strong support for these two major hypotheses of adaptive radiation  
47 using multiple lines of genomic, transcriptomic, and phenotypic evidence in a nascent adaptive  
48 radiation of Caribbean pupfishes. This sympatric radiation contains a widespread generalist algae  
49 and detritus-eating species (*Cyprinodon variegatus*) and two trophic specialists endemic to 10 ky  
50 old hypersaline lakes on San Salvador Island (SSI), Bahamas: a molluscivore *C. brontotheroides*  
51 with a unique nasal protrusion and a scale-eater *C. desquamator* with striking two-fold longer  
52 oral jaws. This clade exhibits hallmarks of adaptive radiation. First trait diversification rates are  
53 up to 1,400 times faster than non-radiating generalist populations on neighboring Bahamian

54 islands in nearly identical hypersaline lake environments. Second, craniofacial diversity within  
55 the radiation is comparable to all other Cyprinodontidae species combined (5, 20).

56 To investigate the spatiotemporal history of adaptive variants unique to trophic specialists  
57 on SSI we first constructed a high quality *de novo* hybrid assembly for *C. brontotheroides* (1.16  
58 Gb size; scaffold N50 = 32 Mb; L50 = 15; 86.4% complete Actinopterygii BUSCOs) and  
59 resequenced 202 genomes (7.9x median coverage) from across the range of *Cyprinodon* and the  
60 two closest outgroups *Megupsilon* and *Cualac* (Fig. 1A; Table S1; Data S1). Population structure  
61 across the Caribbean was largely explained by geographic distance (Fig. 1) and the SSI radiation  
62 did not contain higher overall genetic diversity than the rest of the Caribbean (Fig. S1). All  
63 Caribbean populations experienced similar declines in effective population size following the  
64 last glacial maximum 15 kya when an order of magnitude more Caribbean coastal habitat was  
65 above sea level (Fig. 1D).

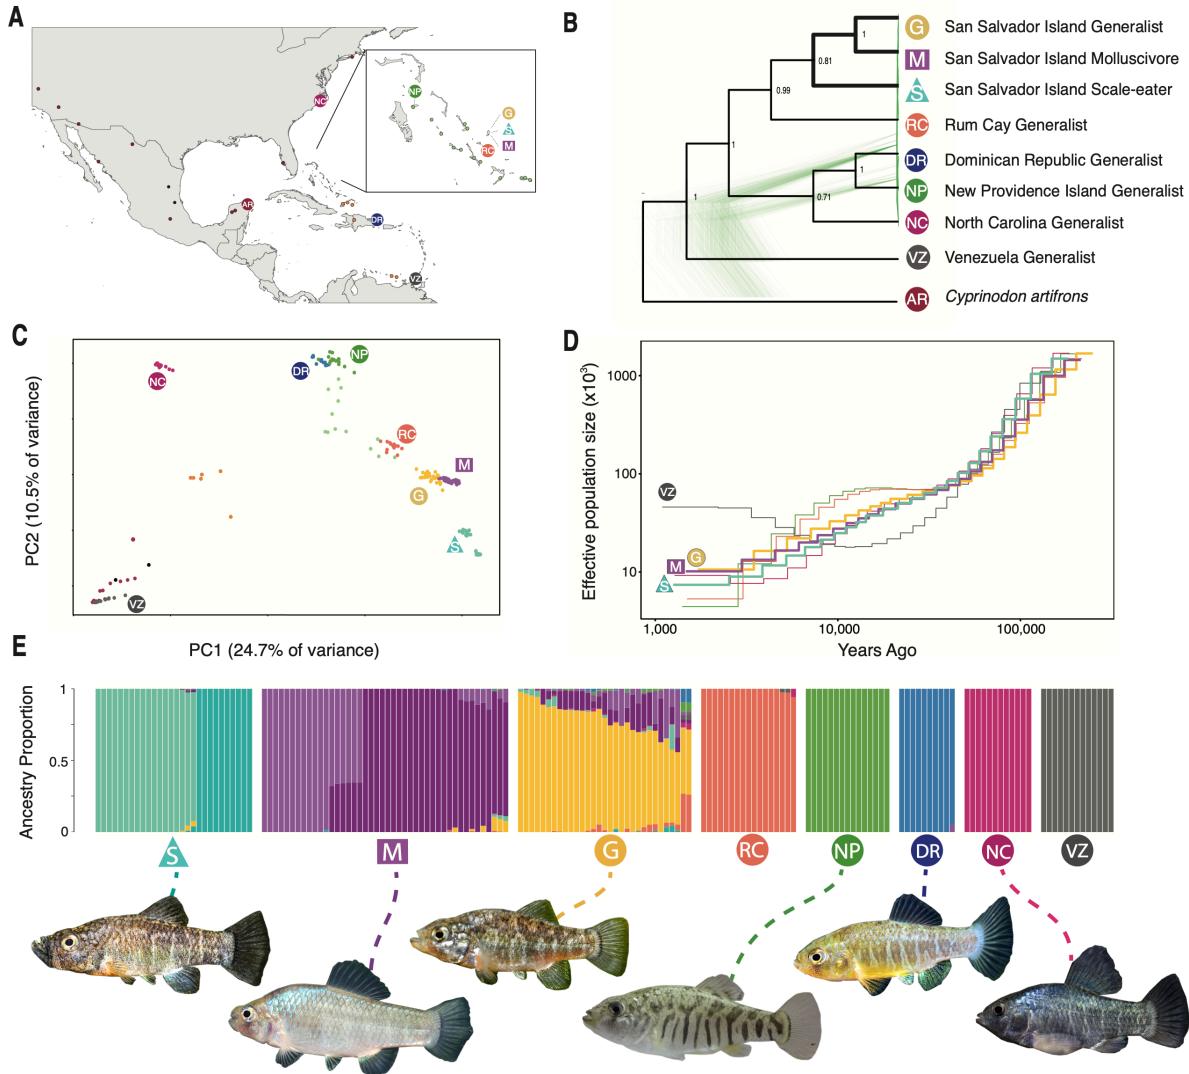

66

67

68

**Fig. 1. Genetic diversity of pupfishes across the Caribbean.** A) Sample locations of

69

*Cyprinodon* pupfishes ( $n = 202$ ) with eight focal populations ( $n \geq 10$  per population) marked

70

with symbols and single individuals from other locations in the Bahamas (light green), Caribbean

71

(orange), continental North and South America (maroon), and *Megupsilon* and *Cualac* outgroups

72

to *Cyprinodon* (black). B) Maximum clade credibility phylogeny estimated with SNAPP from

73

10K SNPs for focal populations and the outgroup *Cyprinodon artifrons* overlaying 500 gene

74

trees randomly sampled from the posterior distribution and visualized with Densitree. C)

75

Principal component analysis of *Cyprinodon* pupfishes. D) Changes in effective population size

76 over time for focal populations in the Caribbean inferred using MSMC. E) Ancestry proportions  
77 across individuals in San Salvador and 5 other Caribbean populations. Proportions estimated  
78 from a LD-pruned dataset in ADMIXTURE with  $k=11$ .

79

80 We scanned 5.5 million variants across 202 Caribbean-wide pupfish genomes to identify  
81 3,464 scale-eater and 1,491 molluscivore candidate adaptive variants, respectively, showing  
82 evidence of both strong genetic differentiation between trophic specialists ( $F_{st} \geq 0.95$ ) and a hard  
83 selective sweep (Fig. 2A; Fig S2; Data S2 and S3). 28% of these candidate adaptive variants  
84 were found in cis-regulatory regions, 12% in intronic regions, and 2% in coding regions,  
85 resulting in a total of 176 candidate genes for adaptive radiation (Table S2-S3). These genes  
86 were enriched ( $FDR < 0.05$ ) for developmental processes associated with the major axes of  
87 phenotypic diversification in this radiation, including feeding behavior, muscle tissue, and  
88 craniofacial development (Fig. 2C; Table S4). 45% of these genes were also differentially  
89 expressed between trophic specialists ( $FDR < 0.05$ ; Data S4-S5) in whole embryos at 2 and/or 8  
90 days post fertilization (dpf) (21).

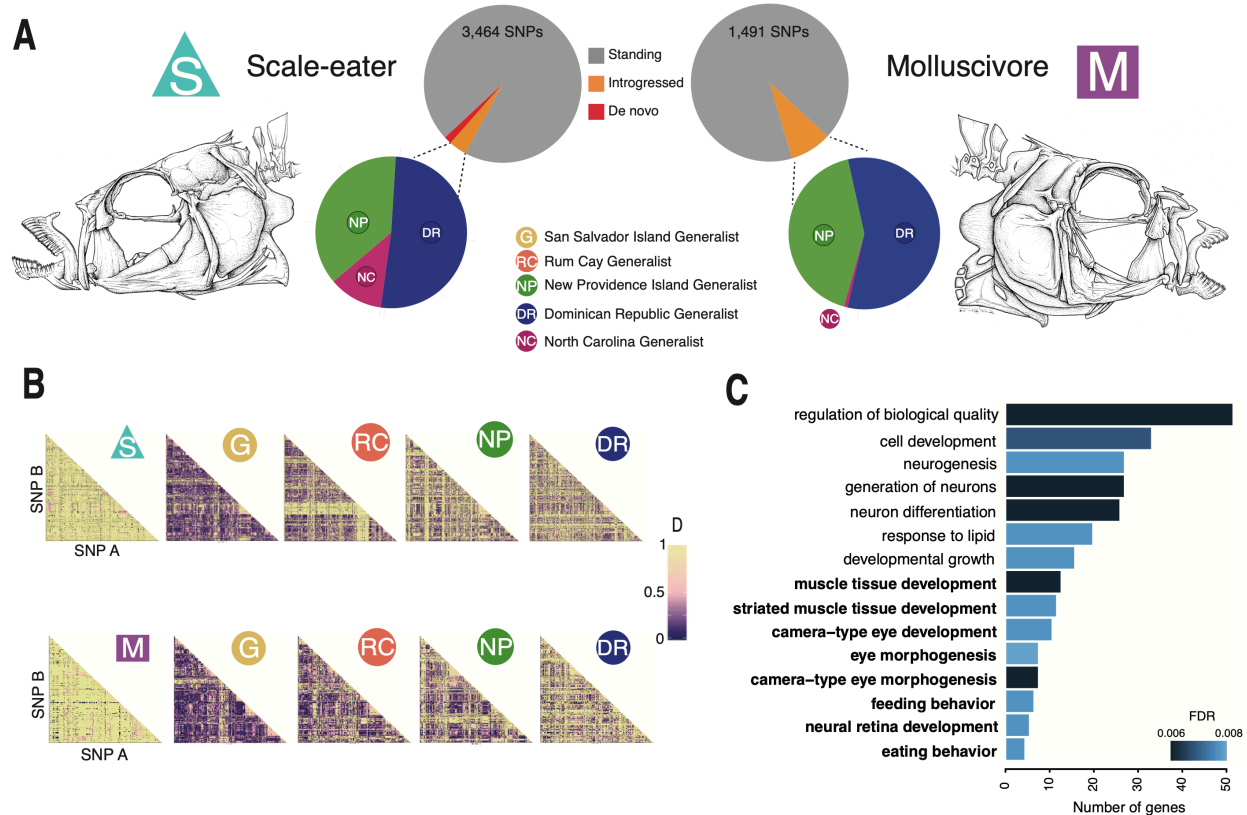

91  
 92 **Fig. 2. All candidate adaptive genetic variants underlying trophic specialist pupfishes. A)**  
 93 Origins of all candidate adaptive variants for trophic specialists ( $F_{st} > 0.95$ ; hard selective sweep  
 94  $CLR \geq 4.47$ ; see supplementary methods for more details) divided into three categories: SSI only  
 95 (de novo: red), introgression from a specific source population (introgressed: orange), or  
 96 observed in multiple Caribbean populations as standing genetic variation (standing: grey).  
 97 Introgressed variation is further broken down by focal source population (Tables S9-S12). B)  
 98 Heatmaps of linkage disequilibrium among all pairwise combinations of candidate adaptive  
 99 variants for scale-eaters (S; top row) and molluscivores (M; bottom row) on SSI in comparison  
 100 to linkage patterns among these SNPs in generalists on SSI (G) and three other focal generalist  
 101 populations across the Caribbean (Venezuela removed from comparison due to its unique  
 102 bottleneck history among the populations). Note the breakdown in linkage disequilibrium among  
 103 candidate adaptive variants outside of trophic specialist populations. C) Top 15 GO categories in

104 which scale-eater candidate adaptive variants were significantly enriched, with relevant terms  
105 corresponding to major axes of divergence in this radiation highlighted in bold (FDR < 0.01; full  
106 list of terms with FDR < 0.05 in Table S4).

107

108 Even though both trophic specialists are endemic to SSI, we also found nearly all their  
109 candidate adaptive variants to occur as standing genetic variation across the Caribbean  
110 (molluscivore: 100%; scale-eater: 98%; Fig. 2A). Furthermore, nearly half these variants were  
111 ancient and also found in *Cualac* or *Megupsilon* outgroups to *Cyprinodon* (41% and 55% of  
112 scale-eater and molluscivore adaptive variants, respectively), which diverged over 5 Mya (22).  
113 However, most adaptive variants did not show any evidence of selection in five other focal high-  
114 coverage Caribbean generalist populations (only 2% and 6% of scale-eater and molluscivore  
115 variants, respectively; Fig. S3) and strong linkage disequilibrium among adaptive variants in SSI  
116 trophic specialists was not observed in these focal populations (Fig. 2B). Thus, novel trophic  
117 specialists within a microendemic adaptive radiation were almost entirely assembled from  
118 ancient standing genetic variation through strong selection for new adaptive combinations of  
119 alleles.

120 Multiple lines of evidence suggest that more hybridization and adaptive introgression  
121 took place in SSI populations than other Caribbean island populations, consistent with the  
122 hypothesis that hybridization triggered adaptive radiation. First, the strongest signal of  
123 introgression across the Caribbean was into the root node of the SSI radiation (Fig. 3B). Second,  
124 trophic specialists on San Salvador experienced at least twice as much adaptive introgression as  
125 other generalist populations across the Caribbean ( $P < 0.006$ ; Fig. 3C). Third, based on

126 differences between the distribution of tract lengths for neutral and adaptively introgressed  
127 regions, we infer that adaptive introgression only resulted from older hybridization events with  
128 generalist source populations, despite evidence of recent and continuous introgression to the  
129 present (Fig 3D-E).



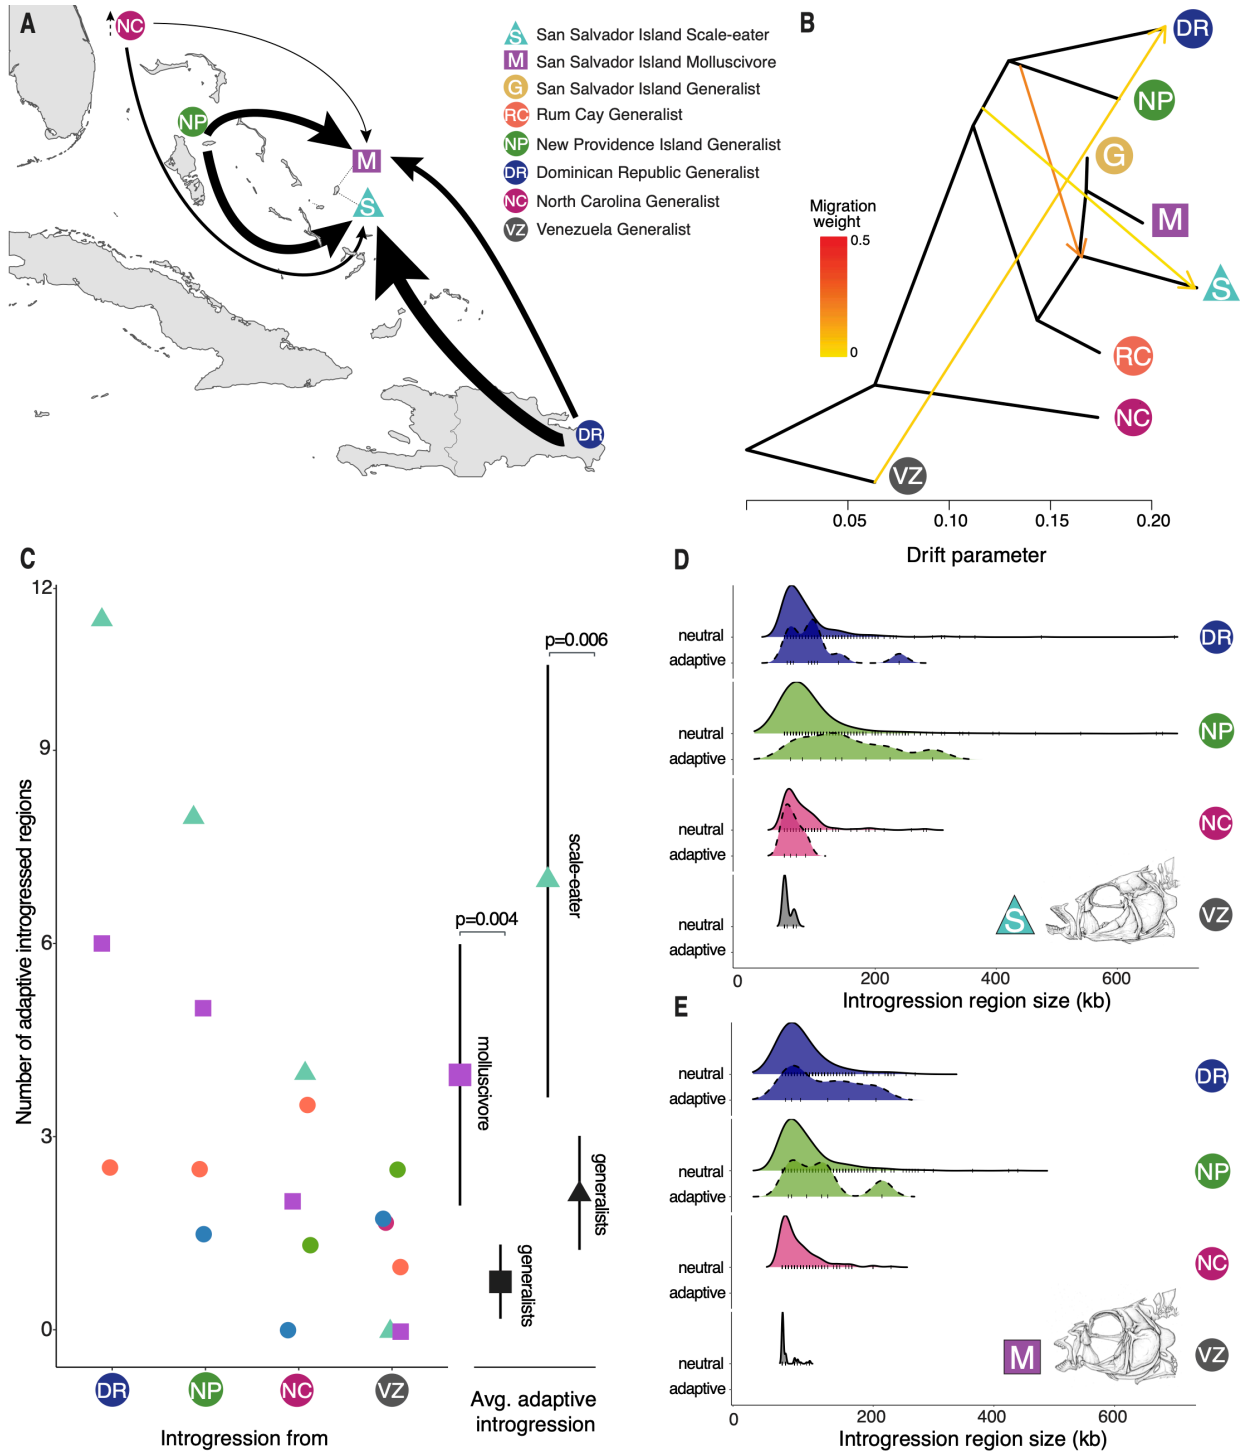

130

131

132

133

**Fig. 3. A history of hybridization across the Caribbean.** A) A summary map of adaptive introgression into SSI trophic specialists from focal generalist populations across the Caribbean, with thickness of arrows proportional to the number of outlier regions of the  $f_d$  statistic. B)

134 Genome-wide population graph inferred from *Treemix* with the 3 strongest signals of admixture.  
135 Note that the strongest signal is into the root node of the SSI radiation. C) The total number of  
136 candidate adaptive introgression regions from outgroup generalist populations is often larger in  
137 specialists (triangle: scale-eater and square: molluscivore) than in other outgroup generalist  
138 populations (circle, color matches population legend in panel A). The bootstrapped mean and  
139 confidence interval for the number of adaptive introgression events into the molluscivore and  
140 scale-eater populations compared to other Caribbean generalist populations are shown to the  
141 right of the panel (triangle: scale-eater introgression regions and square: molluscivore  
142 introgression regions). D-E) Density plots of the size distribution of adaptive introgression  
143 regions (dashed line) and neutral introgression regions (solid line) across the genomes of D)  
144 scale-eaters and E) molluscivores, divided into the four focal generalist source populations. Tick  
145 marks on the bottom of density curves indicate the number of introgression regions observed.

146

147 We also observed distinct temporal stages of adaptive radiation based on divergence time  
148 estimates of candidate loci and timing of selective sweeps. SSI pupfish diversified along the  
149 three major axes of vertebrate adaptive radiation (13), including their trophic environment  
150 (mediated through foraging behavior: scale-eating or snail-eating), trophic morphology, and  
151 sexual communication signals. Based on both GO annotations of genes near candidate adaptive  
152 variants and genome-wide association mapping (GWAS) in Caribbean pupfishes for these trait  
153 axes, we found that the divergence times of loci associated with these three major stages of  
154 adaptive radiation exhibited a significant temporal signal overall (ANOVA,  $P = 0.03$ ; Fig. 4A),  
155 driven by a ‘behavior-first’ pattern (permutation test;  $P=0.0041$ ). Independent adaptive variants

156 in the *cis*-regulatory regions of two genes associated with feeding behavior (*prlh*, *cfap20*; (23,  
157 24)) were the oldest estimated sweeps out of all adaptive loci associated with these axes and  
158 swept from standing genetic variation ten times older than the radiation itself (Fig. 4A,C; 95%  
159 HPD sweep ages: 6,747-8,490 and 6,594-9,210 years, respectively). *Cfap20* and *prlh* were also  
160 both differentially expressed between trophic specialists at early developmental stages,  
161 consistent with a *cis*-regulatory function of these variants (Data S4-S5;(21)).

162 Consistent with the second stage of trophic morphological divergence, adaptive variants  
163 in the regulatory regions of genes associated with eye development (*gnat2*, *tbc1d20*, *zhx2*),  
164 muscle development (*fhod3*, *smyd1*, *kcnk2*, *fhl2*, *pdim5*), and craniofacial morphology (*bcor*,  
165 *itga5*, *tfap2a*, *med1*) swept from both standing genetic variation and adaptive introgression from  
166 three different focal populations across the Caribbean (Fig. 4). We also observed a final stage of  
167 novel refinement in which two *de novo* variants associated with craniofacial morphology arose  
168 on SSI and swept in scale-eating populations (Fig 4). One of these variants is a non-synonymous  
169 substitution in the second exon of *twist1*, a transcription factor known to influence cleft palate  
170 and oral jaw size (25), which was significantly associated with SSI pupfish oral jaw size in a  
171 genome-wide association scan (99<sup>th</sup> PIP percentile GWAS; Fig 4B), is highly conserved across  
172 ray-finned fishes (GERP score: 2.19; Fig S4), and is one of the most recent sweeps of any  
173 adaptive variant detected in our analyses (95% HPD: 1,636-3,413 ya). The second variant is in  
174 the regulatory region upstream of the gene *galr2*, which produces a transmembrane receptor for  
175 galanin, a peptide known to facilitate bone formation (26). This gene was significantly associated  
176 with SSI pupfish oral jaw size (99<sup>th</sup> PIP percentile GWAS; Fig 4B; Data S6) and lies within a  
177 significant QTL that accounts for 15% of the variation in oral jaw size in an F2 intercross  
178 between SSI specialist species (Table S5; (27)). Molluscivores displayed similar temporal stages

179 with craniofacial variation sweeping recently (Fig. S5), but contained no *de novo* variants. 85%  
180 of candidate adaptive regions under selection in molluscivores were also under selection in scale-  
181 eaters but contained different fixed variants (Fig. S3), consistent with previously observed  
182 patterns of parallel metabolic pathway gene expression in trophic specialists but divergent  
183 genotypes (21).

184 There was no evidence for a temporally distinct third stage of diversification in sexual  
185 signals, despite the striking divergence in male reproductive pigmentation between SSI trophic  
186 specialists. Instead, pigmentation diverged throughout the process of adaptive radiation.  
187 Adaptive variants in two genes known to affect pigmentation (*tfap2a*, *th*; Fig 4A) and two  
188 additional candidate variants associated with pupfish caudal fin pigmentation (99th PIP  
189 percentile GWAS; Fig. 4B; Data S7) indicate that diversification in male reproductive coloration  
190 spans a range of divergence times, with some variants more ancient than the radiation itself (Fig  
191 4B). For example, two nearly fixed adaptive variants in the regulatory region of *card8*, a  
192 homolog of *nhrp1* which is associated with vitiligo and pigmentation loss in humans [(28); 99<sup>th</sup>  
193 PIP percentile GWAS; differentially expressed at 2 and 8 dpf; Fig 4B; Data S4-S5,S7], swept at  
194 the same time as many variants associated with craniofacial morphology during the second stage  
195 of adaptive radiation. Divergence estimates of loci associated with pigmentation also span a large  
196 range: from variants in the regulatory region of *card8*, which is ten times older than the radiation,  
197 to a single variant fixed in scale-eaters and in the neighboring Rum Cay generalist population  
198 found in the regulatory region of *pmel* (known to affect melanosome development (29);  
199 differentially expressed between specialists at 8 dpf ;Data S5), which is as young as the radiation  
200 itself (Fig. 4A). This broad range of divergence times and sweep ages may indicate that the  
201 distinctive light/dark reproductive coloration associated with trophic specialists diverged

202 throughout the process of adaptive radiation using existing standing genetic variation, rather than  
203 only during a final stage.

204 Intriguingly, along with distinct temporal patterns of adaptive divergence, we also find  
205 distinct spatial patterns to the sources of adaptive introgression. Introgression from different  
206 regions of the Caribbean brought in adaptive variation for different major axes of phenotypic  
207 diversification within the radiation. Adaptive variants associated with feeding behavior (*prlh*; Fig  
208 4A) and nasal protrusion (*tcf12*; 99<sup>th</sup> PIP percentile GWAS; Fig 4B; Data S8) originated in the  
209 northwestern Bahamas (New Providence Island, Exumas, and Cat Island) whereas adaptive  
210 introgression of variants associated with muscle development arrived from the southeastern  
211 Caribbean in the Dominican Republic (*cenpf*, *eya2*; Fig 4A). This suggests that the extant SSI  
212 radiation of trophic specialists was reassembled from pools of ancient genetic variation contained  
213 in at least two distinct environmental refugia in other regions of the Caribbean, perhaps due to  
214 previous ephemeral adaptive radiations within these regions, thus connecting micro- and  
215 macroevolutionary-scale processes (30, 31).

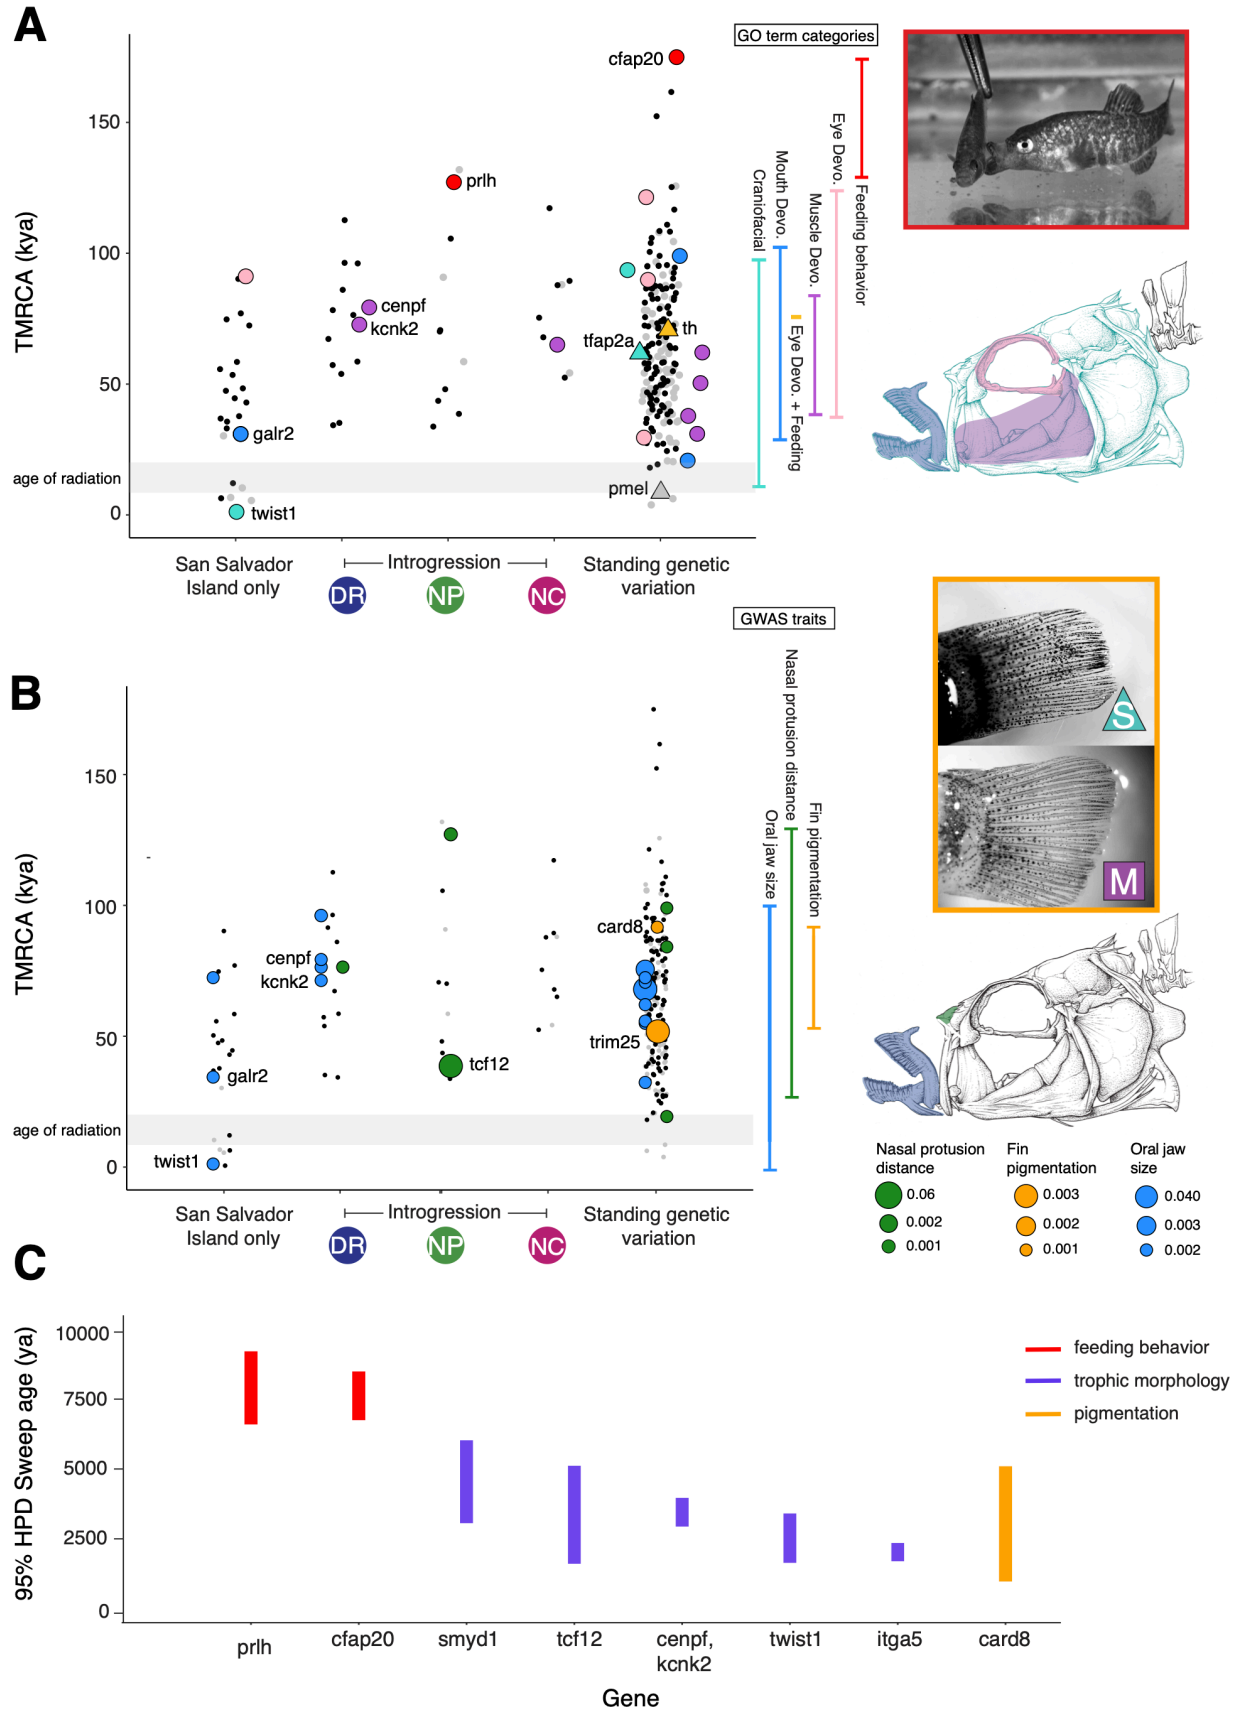

217 **Fig. 4. The spatiotemporal landscape of adaptive radiation in pupfish.** Time to most recent  
218 common ancestor (TMRCA) of candidate adaptive variants based on *Dxy* for 50-kb region  
219 containing candidate adaptive variants. Variants are separated by spatial distribution: SSI only  
220 (de novo), introgression, and standing genetic variation. Gray lines highlight the approximate age  
221 of the radiation: from the peak of the last glacial maximum (approximately 20 kya; (32)) to the  
222 youngest age estimate for filling of hypersaline lakes on SSI (~3 kya; (33)). A) Variants are  
223 colored by their adaptive relevance to this system. Black: adaptive variants annotated for non-  
224 focal GO terms or unannotated; Gray: nearly fixed neutral variants between specialists with no  
225 signal of hard selective sweep; and triangles represent variants associated with pigmentation. All  
226 variants annotated for the GO categories of feeding behavior (red), muscle (purple), eye, mouth  
227 development (blue), and craniofacial development (mouth and eye and/or muscle(teal)) are  
228 highlighted. Genes highlighted in the text are labeled by their associated variant. B) Variants are  
229 colored by significant association (99<sup>th</sup> percentile of PIP) in GWAS with a larger lower oral jaw  
230 size, darker caudal fin pigmentation, and smaller nasal protrusion distance. Dot sizes scale with  
231 PIP score. C) 95% HPD interval of the posterior distribution for selective sweep ages for focal  
232 gene regions. Regions are colored by GO and/or GWAS annotations relevant to the three major  
233 stages of adaptive radiation: habitat preference (feeding behavior), trophic morphology  
234 (craniofacial and muscle), and sexual communication (pigmentation).

235

236 In conclusion, the SSI adaptive radiation was triggered by the formation of a hybrid  
237 swarm of largely ancient alleles maintained within different pools of standing variation in  
238 Caribbean and mainland outgroups. Distinct temporal stages of adaptation observed in this  
239 nascent radiation are consistent with a behavior-first stage of vertebrate radiation. Much of the

240 adaptive variation contributing to major phenotypic axes of diversification in this radiation  
241 originated over longer timescales preceding the divergence of trophic specialist species on SSI,  
242 and across large spatial scales. Our results show that adaptive radiations can occupy expansive  
243 evolutionary spaces: spanning the existing radiation itself and the multitude of both past and  
244 present ephemeral pools of genetic variation that contributed to rapid diversification. Research  
245 into the broader spatiotemporal landscape of vertebrate radiations, including the hominin  
246 radiation (31), can provide clear answers regarding longstanding hypotheses about their origins  
247 and contributions to global patterns of biodiversity.

248

#### 249 **References and Notes:**

- 250 1. G. G. Simpson, *Tempo and mode of evolution* (Columbia University Press, ed. 15, 1944).
- 251 2. J. T. Stroud, J. B. Losos, Ecological Opportunity and Adaptive Radiation. *Annu. Rev. Ecol.*  
252 *Evol. Syst.* **47**, 507–532 (2016).
- 253 3. D. H. Erwin, Novelty and innovation in the history of life. *Curr. Biol.* **25**, R930–R940  
254 (2015).
- 255 4. C. E. Wagner, L. J. Harmon, O. Seehausen, Ecological opportunity and sexual selection  
256 together predict adaptive radiation. *Nature.* **487**, 366–369 (2012).
- 257 5. C. H. Martin, The cryptic origins of evolutionary novelty: 1,000-fold-faster trophic  
258 diversification rates without increased ecological opportunity or hybrid swarm. *Evolution*  
259 (*N. Y.*), 1–16 (2016).
- 260 6. D. L. Rabosky, Diversity-Dependence, Ecological Speciation, and the Role of Competition  
261 in Macroevolution. *Annu. Rev. Ecol. Evol. Syst.* **44**, 481–502 (2013).
- 262 7. O. Seehausen, Hybridization and adaptive radiation. *Trends Ecol. Evol.* **19**, 198–207  
263 (2004).
- 264 8. D. A. Marques, J. I. Meier, O. Seehausen, A Combinatorial View on Speciation and  
265 Adaptive Radiation. *Trends Ecol. Evol.* (2019),  
266 doi:<https://doi.org/10.1016/j.tree.2019.02.008>.
- 267 9. E. J. Richards, C. H. Martin, Adaptive introgression from distant Caribbean islands  
268 contributed to the diversification of a microendemic adaptive radiation of trophic  
269 specialist pupfishes. *PLoS Genet.* **13**, 1–35 (2017).
- 270 10. J. I. Meier, D. A. Marques, S. Mwaiko, C. E. Wagner, L. Excoffier, O. Seehausen, Ancient  
271 hybridization fuels rapid cichlid fish adaptive radiations. *Nat. Commun.* **8**, 14363 (2017).



- 272 11. The Heliconius Genome Consortium, K. K. Dasmahapatra, J. R. Walters, A. D. Briscoe, J.  
273 W. Davey, A. Whibley, N. J. Nadeau, A. V. Zimin, D. S. T. Hughes, L. C. Ferguson, S. H.  
274 Martin, C. Salazar, J. J. Lewis, S. Adler, S.-J. Ahn, D. a. Baker, S. W. Baxter, N. L.  
275 Chamberlain, R. Chauhan, B. a. Counterman, T. Dalmay, L. E. Gilbert, K. Gordon, D. G.  
276 Heckel, H. M. Hines, K. J. Hoff, P. W. H. Holland, E. Jacquin-Joly, F. M. Jiggins, R. T. Jones,  
277 D. D. Kapan, P. Kersey, G. Lamas, D. Lawson, D. Mapleson, L. S. Maroja, A. Martin, S.  
278 Moxon, W. J. Palmer, R. Papa, A. Papanicolaou, Y. Pauchet, D. A. Ray, N. Rosser, S. L.  
279 Salzberg, M. a. Supple, A. Surridge, A. Tenger-Trolander, H. Vogel, P. a. Wilkinson, D.  
280 Wilson, J. a. Yorke, F. Yuan, A. L. Balmuth, C. Eland, K. Gharbi, M. Thomson, R. A. Gibbs, Y.  
281 Han, J. C. Jayaseelan, C. Kovar, T. Mathew, D. M. Muzny, F. Onger, L.-L. Pu, J. Qu, R. L.  
282 Thornton, K. C. Worley, Y.-Q. Wu, M. Linares, M. L. Blaxter, R. H. French-Constant, M.  
283 Joron, M. R. Kronforst, S. P. Mullen, R. D. Reed, S. E. Scherer, S. Richards, J. Mallet, W.  
284 Owen McMillan, C. D. Jiggins, Butterfly genome reveals promiscuous exchange of  
285 mimicry adaptations among species. *Nature*. **487**, 94–98 (2012).
- 286 12. S. Lamichhaney, J. Berglund, M. S. Almén, K. Maqbool, M. Grabherr, A. Martinez-Barrio,  
287 M. Promerová, C.-J. Rubin, C. Wang, N. Zamani, B. R. Grant, P. R. Grant, M. T. Webster, L.  
288 Andersson, Evolution of Darwin’s finches and their beaks revealed by genome  
289 sequencing. *Nature*. **518**, 371–375 (2015).
- 290 13. T. J. Streebman, P. D. Danley, The stages of vertebrate evolutionary radiation. *Trends Ecol.*  
291 *Evol.* **18**, 126–131 (2003).
- 292 14. J. B. Losos, T. W. Schoener, D. A. Spiller, Endurance trials Dietary effects on ontogenic  
293 consistency and second analysis of natural selection. *Lett. to Nat.* **432**, 505–508 (2004).
- 294 15. J. Diamond, Evolution of ecological segregation in the New Guinea montane avifauna.  
295 *Community Ecol.*, 98–125 (1986).
- 296 16. R. B. Huey, P. E. Hertz, B. Sinervo, Behavioral drive versus behavioral inertia in evolution:  
297 A null model approach. *Am. Nat.* **161**, 357–366 (2003).
- 298 17. L. C. Sallan, M. Friedman, Heads or tails: Staged diversification in vertebrate evolutionary  
299 radiations. *Proc. R. Soc. B Biol. Sci.* **279**, 2025–2032 (2012).
- 300 18. R. E. Glor, Phylogenetic Insights on Adaptive Radiation. *Annu. Rev. Ecol. Evol. Syst.* **41**,  
301 251–270 (2010).
- 302 19. S. Duchêne, R. Lanfear, Phylogenetic uncertainty can bias the number of evolutionary  
303 transitions estimated from ancestral state reconstruction methods. *J. Exp. Zool. Part B*  
304 *Mol. Dev. Evol.* **324**, 517–524 (2015).
- 305 20. C. H. Martin, P. C. Wainwright, Trophic novelty is linked to exceptional rates of  
306 morphological diversification in two adaptive radiations of cyprinodon pupfish. *Evolution*  
307 *(N. Y.)*. **65**, 2197–2212 (2011).
- 308 21. J. A. McGirr, C. H. Martin, Parallel evolution of gene expression between trophic  
309 specialists despite divergent genotypes and morphologies. *Evol. Lett.* **2**, 62–75 (2018).
- 310 22. A. A. Echelle, E. W. Carson, A. F. Echelle, D. Bussche, T. E. Dowling, Historical

- 311 Biogeography of the New-World Pupfish Genus *Cyprinodon* (Teleostei: Cyprinodontidae).  
312 *Copeia*. **2005**, 320–339 (2005).
- 313 23. T. M. Maia, D. Gogendeau, C. Pennetier, C. Janke, R. Basto, Bug22 influences cilium  
314 morphology and the posttranslational modification of ciliary microtubules. *Biol. Open*. **3**,  
315 138–151 (2014).
- 316 24. Y. Takayanagi, H. Matsumoto, M. Nakata, T. Mera, S. Fukusumi, S. Hinuma, Y. Ueta, T.  
317 Yada, G. Leng, T. Onaka, Endogenous prolactin-releasing peptide regulates food intake in  
318 rodents. *J. Clin. Invest.* **118**, 4014–4024 (2008).
- 319 25. C. S. Teng, M. C. Ting, D. T. Farmer, M. Brockop, R. E. Maxson, J. G. Crump, Altered bone  
320 growth dynamics prefigure craniosynostosis in a zebrafish model of Saethre-Chotzen  
321 syndrome. *Elife*. **7**, 1–23 (2018).
- 322 26. H. W. McGowan, J. A. Schuijers, B. L. Grills, S. J. McDonald, A. C. McDonald, Galnon, a  
323 galanin receptor agonist, improves intrinsic cortical bone tissue properties but  
324 exacerbates bone loss in an ovariectomised rat model. *J. Musculoskelet. Neuronal*  
325 *Interact.* **14**, 162–172 (2014).
- 326 27. C. H. Martin, P. A. Erickson, C. T. Miller, The genetic architecture of novel trophic  
327 specialists: higher effect sizes are associated with exceptional oral jaw diversification in a  
328 pupfish adaptive radiation. *Mol. Ecol.* **26**, 624–638 (2017).
- 329 28. A. D. Osualdo, J. C. Reed, NLRP1, a regulator of innate immunity associated with vitiligo.  
330 *Pigment Cell Melanoma Res.*, 5–8 (2011).
- 331 29. H. B. Schonhaler, J. M. Lampert, J. Von Lintig, H. Schwarz, R. Geisler, S. C. F. Neuhaus, A  
332 mutation in the silver gene leads to defects in melanosome biogenesis and alterations in  
333 the visual system in the zebrafish mutant fading vision. *Dev. Biol.* **284**, 421–436 (2005).
- 334 30. E. B. Rosenblum, B. A. J. Sarver, J. W. Brown, S. Des Roches, K. M. Hardwick, T. D. Hether,  
335 J. M. Eastman, M. W. Pennell, L. J. Harmon, Goldilocks Meets Santa Rosalia: An  
336 Ephemeral Speciation Model Explains Patterns of Diversification Across Time Scales. *Evol.*  
337 *Biol.* **39**, 255–261 (2012).
- 338 31. C. H. Martin, E. J. Richards, The Paradox behind the Pattern of Rapid Adaptive Radiation:  
339 How Can the Speciation Process Sustain Itself through an Early Burst? *Annu. Rev. Ecol.*  
340 *Evol. Syst.* (2019).
- 341 32. P. U. Clark, A. S. Dyke, J. D. Shakun, A. E. Carlson, J. Clark, B. Wohlfarth, J. X. Mitrovica, S.  
342 W. Hostetler, A. M. McCabe, The Last Glacial Maximum. *Science (80-. )*. **325**, 710–714  
343 (2009).
- 344 33. B. J. Turner, D. D. Duvernell, T. M. Bunt, M. G. Barton, Reproductive isolation among  
345 endemic pupfishes (*Cyprinodon*) on San Salvador Island, Bahamas: Microsatellite  
346 evidence. *Biol. J. Linn. Soc.* **95**, 566–582 (2008).

347

348 **Acknowledgments:** We thank Rebecca Tarvin for helpful comments on the manuscript; the  
349 Gerace Research Centre and Troy Day for logistical support; the governments of the Bahamas,  
350 Dominican Republic, the National Park Service and U.S. Fish and Wildlife Service for  
351 permission to collect and export samples; the Vincent J. Coates Genomics Sequencing Center  
352 and Functional Genomics Laboratory at UC Berkeley for performing whole-genome library  
353 preparation and sequencing (supported by NIH S10 OD018174 Instrumentation Grant), and the  
354 University of North Carolina at Chapel Hill for computational resources. **Funding:** This work  
355 was funded by the National Science Foundation DEB CAREER grant #1749764, National  
356 Institutes of Health grant 5R01DE027052-02, the University of North Carolina at Chapel Hill,  
357 and the University of California, Berkeley to CHM. **Author contributions:** Conceptualization –  
358 EJR,CHM; Data Curation: EJR,JRW,MJS, DCOC; Formal Analyses: EJR,JAM,MSJ; Resources:  
359 CHM, BJT; Visualization: EJR,CHM; Writing – original draft: EJR; Writing – review & editing:  
360 EJR, CHM, JAM, MSJ, JRW, JWP, MJS. **Competing interests:** The authors declare no  
361 competing interests. **Data and materials availability:** Genomic and RNA sequence data are  
362 archived at the National Center for Biotechnology Information BioProject Database (Accession:  
363 XXX; PRJNA394148, PRJNA391309; and PRJNA305422); and additional data and scripts are  
364 on the Dryad Digital Repository (XXX) and Github (<https://github.com/joemcgirr>).

365 **Supplementary Materials:**

366 Materials and Methods

367 Figures S1-S13

368 Tables S1-S14

369 External Databases S1-S9

370 References (34-86)

371

372

373

374 **Materials and Methods**

375 Sampling

376 Pupfishes were collected from across the complete Atlantic and Caribbean range of *Cyprinodon*  
377 from Massachusetts to Venezuela. For the three species of the SSI radiation, individual pupfish  
378 were collected from 15 isolated hypersaline lakes on San Salvador Island (Table S1;Data S1) and  
379 one estuary (Pigeon Creek) using hand and seine nets between 2011 and 2018. 36 *Cyprinodon*  
380 *variegatus*, 47 *C. brontotheroides*, and 39 *C. desquamator* were sampled across these lakes,  
381 including six lakes in which one or two specialist species occur in sympatry with the generalists  
382 (Crescent Pond, Storr's Lake, Little Lake, Oyster Pond, Osprey Lake, Moon Rock Pond). The  
383 sampling of outgroup high-coverage focal populations of generalist pupfish included 17  
384 individuals from *C. laciniatus* from Lake Cunningham, New Providence Island, Bahamas; 18 *C.*  
385 *variegatus* from Lake George, Rum Cay, Bahamas; 12 *C. higuey* from Laguna Bavaro,  
386 Dominican Republic; 14 *C. variegatus* from Fort Fisher estuary, North Carolina, United States;  
387 and 14 *C. dearborni* from Isla Margarita, Venezuela. 37 individuals were also collected from  
388 other islands and localities spanning the range of *Cyprinodon* across the Caribbean and Atlantic  
389 coasts, including captive-bred individuals from the extinct species *Megupsilon aporus* and  
390 threatened species *Cualac tessellatus*, the most closely related outgroup genera to *Cyprinodon*  
391 (Fig. 1A; Table S1;Data S1;(1)).

392 Fishes were euthanized in an overdose of buffered MS-222 (Finquel, Inc.) following  
393 approved protocols from the University of California, Davis Institutional Animal Care and Use  
394 Committee (#17455), the University of North Carolina at Chapel Hill Animal Care and Use  
395 Committee (#18-061.0), and the University of California, Berkeley Animal Care and Use  
396 Committee (AUP-2015-01-7053) and preserved in 95-100% ethanol.

397

398 Genomic library preparation

399 DNA was extracted from muscle tissue using DNeasy Blood and Tissue kits (Qiagen, Inc.) and  
400 quantified on a Qubit 3.0 fluorometer (ThermoFisher Scientific, Inc.). Genomic libraries were  
401 prepared using the automated Apollo 324 system (WaterGen Biosystems, Inc.) at the Vincent J.  
402 Coates Genomic Sequencing Center (QB3). Samples were fragmented using Covaris sonication,  
403 barcoded with Illumina indices, and quality checked using a Fragment Analyzer (Advanced  
404 Analytical Technologies, Inc.). Nine to ten samples were pooled per lane for 150PE sequencing  
405 on four lanes of an Illumina HiSeq4000 and an additional 96 individuals were sequenced on one  
406 150PE lane of Illumina Novaseq with S4 chemistry. This included 42 individuals from a  
407 previous genomic study (2).

408

409 De novo genome assembly and annotation

410 We constructed a hybrid de novo assembly for an inbred lab-raised individual of *C.*  
411 *brontotheroides* using three different sequencing technologies. Oxford Nanopore sequencing was  
412 performed at UNC's High Throughput Sequencing Facility, a 10X Genomics synthetic long-read  
413 library was prepared and sequenced by Hudson Alpha, and Chicago and HiC libraries were  
414 prepared and sequenced by Dovetail Genomics. Genomic DNA was extracted from an inbred F4  
415 male *C. brontotheroides* individual, an offspring from three generations of full-sib mating in the  
416 lab, starting with an F0 generation collected from Crescent Pond, SSI. 10X sequencing was  
417 performed on this individual according to 10X Genomics' recommended protocol, sequenced on  
418 a HiSeq4000, resulting in 460 million 2x150 bp reads. DNA was extracted from this same  
419 molluscivore individual for Nanopore sequencing using modified a phenol:chloroform extraction  
420 protocol (3). Two libraries were sequenced on R9.4 flow cells on GridION – one using the Rapid

421 Sequencing Kit (RAD004) and one Ligation Kit (LSK109), producing 4.9 Gbp of sequences  
422 with a read length N50 of 4.7 Kbp.

423 10X Genomics sequences were first assembled using Supernova (v2.0.0, 10X Genomics)  
424 to produce a preliminary “pseudohap” assembly. Nanopore reads were corrected using FMLRC  
425 (4). The Supernova assembly was scaffolded with corrected nanopore reads using LINKS (5)  
426 using the recommended iterative approach (34 rounds). The nanopore-scaffolded assembly was  
427 further scaffolded using HiC and Chicago sequences; we predicted Hi-C contacts using Juicer  
428 (v1.6.2; (6)), followed by scaffolding with 3D-DNA (v180922) (7). We performed a final  
429 polishing with four rounds of Racon (v1.3.1; (8)) using corrected nanopore reads. The final  
430 assembly consists of 1.16 Gbp in 15,698 scaffolds with an N50 of 32,013,756 bp.

431 To further validate our assembly, we ran BUSCO (v3.0.1) (9) to identify known single-  
432 copy conserved genes. We found 86.4% of BUSCOs in the Actinopterygii class assembled  
433 completely, and 83.4% in a single copy. We annotated this assembly using the Maker pipeline  
434 (v3.01.02)(10), providing alternate ESTs and protein evidence for ab-initio gene prediction from  
435 *C. variegatus* (11), which is expected to have very similar genic structure and codon usage.  
436 Predicted genes were assigned putative function by aligning (BLASTp) to the UniProt database.

437

#### 438 Population genotyping

439 Raw reads were mapped from 222 individuals to a de-novo assembly of *Cyprinodon*  
440 *brontotheroides* reference genome (v 1.0; total sequence length = 1,162,855,435 bp; number of  
441 scaffold = 15,698, scaffold N50 = 32 Mbp) with bwa-mem (v 0.7.12;(12)). Duplicate reads were  
442 identified using MarkDuplicates and BAM indices were created using BuildBamIndex in the  
443 Picard software package ([http://picard.sourceforge.net\(v.2.0.1\)](http://picard.sourceforge.net(v.2.0.1))). We followed the best practices

444 guide recommended in the Genome Analysis Toolkit (v 3.5;(13)) to call and refine our single  
445 nucleotide polymorphism (SNP) variant dataset using the program HaplotypeCaller. We filtered  
446 SNPs based on the recommended hard filter criteria (i.e. QD < 2.0; FS < 60; MQRankSum < -  
447 12.5; ReadPosRankSum < -8;(13, 14)) because we lacked high-quality known variants for these  
448 non-model species. Variants for San Salvador Island individuals were additionally filtered to  
449 remove SNPs with a minor allele frequency below 0.05, genotype quality below 20, or  
450 containing more than 20% missing data across all individuals at the site using vcftools  
451 (v.0.1.15;(15)). This set of 9.3 million variants was then further filtered for variants that had  
452 minor allele frequencies above 0.05 and less than 50% missing data across all Caribbean  
453 outgroup individuals with population level sampling. Variants in poorly mapped regions were  
454 then removed using a mask file generated from the program SNPable (<http://bit.ly/snpable>; k-  
455 mer length =50, and 'stringency'=0.5). Our final dataset after filtering contained 5.5 million  
456 variants.

457

#### 458 Population genetic analyses

459 This dataset was first pruned for SNPs in strong linkage disequilibrium using the LD pruning  
460 function (--indep-pairwise 50 5 0.5) in plink (v1.9)(16), leaving 2.6 million variants. To visualize  
461 population structure in our dataset, we ran a principle component analysis using the eigenvectors  
462 outputted by plink's pca function (--pca). The first two principal components were plotted in R  
463 (R Core Team 2018 v3.5.0). To visualize admixture among the species we estimated the  
464 proportion of shared ancestry among individuals in our dataset using ADMIXTURE  
465 (v.1.3.0)(17). The number of populations (K) was decided upon using ADMIXTURE's cross-  
466 validation method (--cv) across 1-20 population values of K. A K of 11 populations was then

467 chosen using the broken-stick method. Ancestry proportions estimated by ADMIXTURE were  
468 plotted in R. Four individuals that appeared to exhibit recent hybrid ancestry between *C.*  
469 *variegatus* and *C. brontotheroides* and two individuals that appeared to exhibit recent hybrid  
470 ancestry between *C. variegatus* and *C. desquamator* were removed from downstream analyses.  
471 We also excluded 15 individuals that appeared as strong outliers in the PCA and ADMIXTURE  
472 analyses (3 *C. variegatus* from San Salvador Island, 1 *C. brontotheroides*, 3 *C. laciniatus*, 2 *C.*  
473 *higuey*, 3 *C. variegatus* from North Carolina, and 3 *C. dearborni* from Venezuela), resulting in  
474 32 *Cyprinodon variegatus*, 44 *C. brontotheroides*, and 26 *C. desquamator* individuals from San  
475 Salvador Island, 16 individuals from *C. laciniatus* from Lake Cunningham, New Providence  
476 Island in the Bahamas, 17 *C. variegatus* from Lake George, Rum Cay, 10 *C. higuey* from Lake  
477 Bavaro, Dominican Republic, 12 *C. variegatus* from Fort Fisher estuary North Carolina, and 11  
478 *C. dearborni* from Isla Margarita, Venezuela (Fig 1E). None of the 37 single individuals from  
479 other locations were removed. The final dataset used in downstream analyses included 202  
480 individuals.

481 Within-population nucleotide diversity ( $\pi$ ) was calculated in 50-kb windows across the  
482 genome for each of eight focal populations with more than 10 individuals sampled. To ensure an  
483 equal comparison among populations, we downsampled individuals from each population to the  
484 number of individuals in the focal population with the lowest sampling ( $n=10$ ). We did this by  
485 randomly selecting 10 individuals for each population before calculating  $\pi$  in sliding windows.  
486 We repeated this 100 times and averaged  $\pi$  across the replicates (Fig. S1). Due to the large  
487 sample size of windows for each population ( $n=30,762$ ), slight differences in mean genome-wide  
488 within-population genetic diversity resulted in statistically significant differences in genome-  
489 wide diversity among populations (ANOVA,  $P > 2.2 \times 10^{-16}$ ). However, the effect sizes of the



490 difference in these means was small in all comparisons except San Salvador Island generalists  
491 and North Carolina and Venezuela generalist populations (Cohen's  $d=0.87$  and  $1.38$   
492 respectively). The much lower within-population genetic diversity in Venezuela than other  
493 generalist populations could be explained by the fact that this population seems to have  
494 undergone a recent bottleneck in the past that was not observed in the other populations sampled  
495 (Fig. 1C and S1).

496 Genome-wide  $F_{st}$  for pairwise San Salvador Island species comparisons was calculated  
497 for each variant site and in 50-kb windows with at least 100 variant sites across the genome  
498 using the python script `popGenWindows.py` available from  
499 [https://github.com/simonhmartin/genomics\\_general](https://github.com/simonhmartin/genomics_general) (18). Allowing for some admixture among  
500 these recent species, we considered divergent SNPs to be those that were nearly fixed between  
501 specialist species ( $F_{st} \geq 0.95$ ; Fig. S2; Table S2-S3; Data S2-S3). All divergent variants that were  
502 also in a region of a hard selective sweep (see section below) were also in the 90<sup>th</sup> percentile of  
503  $D_{xy}$  across all genomic windows, as calculated for the same 50-kb windows using the python  
504 script `popGenWindows.py`.

505 A window size of 50-kb for sliding window tests was based on the extent of linkage  
506 disequilibrium (LD) along a scaffold. We calculated LD decay from pairwise calculations of LD  
507 between all SNPs within 100-kb of each other along the largest scaffold in the genome using  
508 PLINK's LD function ( $-r^2$ ). Linkage disequilibrium decayed to background rates after 50-kb at a  
509 threshold of  $r^2 \geq 0.1$  (Fig. S6).

510

511 Mutation rate estimation

512 The spontaneous mutation rate for Caribbean pupfishes was estimated from high coverage  
513 sequencing (15-69x) of parents and offspring from two independent pedigreed crosses of San  
514 Salvador Island species: one cross between a second generation inbred lab-reared generalist and  
515 third-generation inbred lab-reared molluscivore individual from Little Lake and another between  
516 a second-generation lab-reared generalist and second-generation lab-reared scale-eater from  
517 Little Lake. Using the same pipeline for alignment to the reference genome and variant calling  
518 with GATK as above, we obtained 9 million variants across 7 individuals from these two crosses  
519 after using GATK's recommend hard filter criteria (i.e.  $QD < 2.0$ ;  $FS < 60$ ;  $MQRankSum < -$   
520  $12.5$ ;  $ReadPosRankSum < -8$ ). We independently called variants for these same individuals again  
521 using samtools mpileup (v1.9) with the command line arguments *bcftools mpileup -Ou | bcftools*  
522 *call -m -Ob -f GQ,GP*. For both sets of variants (GATK and samtools), poorly mapped regions  
523 were then removed using a mask file generated from the program SNPable (<http://bit.ly/snpable>;  
524 k-mer length =50, and 'stringency'=0.5). We further excluded sequences in which indels were  
525 called in any sample, as well as 3 bp of sequence around the indel.

526 After variant calling, we searched for new mutations in the offspring: sites where an  
527 offspring is heterozygous for an allele not found in either of the parents. To determine a set of  
528 filters for new mutation sites in the offspring, we first looked for variants which were  
529 heterozygous in the offspring and alternatively homozygous in the parents (i.e. known  
530 heterozygous sites). Eleven measures of variant quality scores for these known heterozygous  
531 sites in the offspring were then used to filter sites for new mutations in the offspring (e.g. depth,  
532 genotype quality, mapping quality; see Table S6 for full details) following similar pipelines and  
533 filters from several previous studies ((19–21)). For example, only new mutation sites that had a  
534 depth within 2 standard deviations of the mean depth of the known heterozygous sites in the

535 offspring were kept (all thresholds reported in Table S6). Additionally, new mutations in the  
536 offspring were determined from sites in which parents were homozygous for the reference allele  
537 and the offspring were heterozygous with quality scores within those of the known heterozygote  
538 sites (Table S6) and had an allele balance score between 0.3 and 0.7. This set of variants was  
539 then filtered for those independently called in both GATK and samtools runs (Table S6) with no  
540 known segregating sites in the larger Caribbean population dataset (i.e. not sites where the  
541 alternative new allele in the offspring was found in four or more copies in the larger dataset).

542         Using the GATK function *callable loci*, we then determined the ‘accessible genome’: the  
543 total number of base pairs from the genome in which mutations could be confidently called for  
544 each cross. This number was estimated using similar variant quality filters as for the new  
545 mutation estimate, excluding those filters that were only applicable to the new mutations and  
546 heterozygous sites (i.e. filters assessing quality of alternative allele calls). This meant excluding  
547 genomic regions where 1) read map depth in any member was not within two standard deviations  
548 of the average read map depth (varies by sample; Table S6), 2) regions with mapping quality  
549 scores less than 50, and 3) regions with base quality scores less than 30.

550         Since the new mutations observed could have originated on either chromosome, the point  
551 estimate of per site mutation rate is the number of new mutations observed divided by two times  
552 the size of the accessible genome. The mutation rates were then averaged across individual  
553 offspring for each cross (Table S6) to obtain a mean mutation rate estimate of  $1.56 \times 10^{-8}$   
554 mutations per site per generation. This is faster than mutation rate estimates for other teleosts  
555 (20, 22, 23); however, short-lived smaller species with higher metabolism rates like pupfishes are  
556 expected to exhibit faster mutation rates (24). We estimate generation times in the field to be  
557 approximately one year based on laboratory and field (25) longevity studies.

558

## 559 Demographic Inferences

560 Various demographic histories can shift the distribution of low- and high-frequency derived  
561 variants to falsely resemble signatures of hard selective sweeps. In order to account for  
562 demography in downstream analyses, we used the MSMC (v. 1.0.1; 24) to infer historical  
563 effective population size ( $N_e$ ) changes in seven focal populations. We ran MSMC on unphased  
564 GATK-called genotypes separately for an individual in each of seven focal populations  
565 (excluding generalist *C. higuey* due to poor sequencing quality of our single high-coverage  
566 individual) with higher sequencing coverage (17-28x mean coverage across individuals; Fig  
567 1D; Table S7). As recommended in the MSMC documentation, we masked out sites with less  
568 than half or more than double the mean coverage for that individual or with a genotype quality  
569 below 20. We also excluded sites with <10 reads as recommended by Nadachowska-Brzyska et  
570 al. (27). To scale the output of MSMC to real time and effective population sizes, we used a one-  
571 year generation time (24) and the estimated spontaneous mutation rate of  $1.56 \times 10^{-8}$  for  
572 Caribbean pupfishes (see previous section).

573

## 574 Introgression

575 We characterized differential introgression between specialists in the SSI radiation on both a  
576 genome-wide and local level. We visualized the directionality of hybridization and introgression  
577 on a genome-wide level using *TreeMix* (v 1.13; (28)). *TreeMix* estimates a maximum likelihood  
578 phylogeny of the focal populations and then fits a user specified number of migration edges to  
579 the tree by comparing genetic covariances of allele frequencies among populations. We ran  
580

581 *TreeMix* with *C. dearborni* as the root node, and with 0 through 20 migration edges. The most  
582 likely number of migration events was chosen using the broken-stick approach (Fig. S7).

583 We investigated how signatures of hybridization at the genome-wide level contributed  
584 variation potentially important to the divergence between species using the  $f_d$  statistic, which is  
585 designed to look for signatures of introgression across sliding genomic windows (18). The  $f_d$   
586 statistic, a modified version of the  $D$ -statistic, looks at allele frequencies fitting two allelic  
587 patterns referred to as ABBA and BABA based on the tree (((P1,P2),P3),O), where O is an  
588 outgroup species in which no gene flow is thought to occur with the other populations (18). We  
589 used 2 individuals of *C. artifrons* from Cancun, Mexico as our distantly related outgroup  
590 population for this test, which forms the deepest divergence event with *C. variegatus* within the  
591 *Cyprinodon* clade (1), and focused on introgression between San Salvador Island specialists and  
592 Caribbean populations. Based on the tree (((P1,P2),P3), *C. artifrons*), the  $f_d$  statistic was  
593 calculated for the combinations of populations in which P2 was either the scale-eater or  
594 molluscivore and P3 was one of the Caribbean outgroup populations (Table S8 and S9) in 50-kb  
595 sliding windows with a minimum of 100 variant sites with no missing data within a population  
596 using the ABBABABA.py script (available on  
597 [https://github.com/simonhmartin/genomics\\_general](https://github.com/simonhmartin/genomics_general);(18)). To compare these patterns of  
598 introgression into the specialist to patterns of introgression into focal generalist populations on  
599 other islands, we also calculated  $f_d$  statistics across the genomes of generalist populations on  
600 islands where we had population-level sampling and sister groups to fit the relationship expected  
601 for the test (Table S9B and S9D).

602 Significance of  $f_d$  values in sliding windows across the genome was evaluated using  
603 simulations with no migration using ms-move (29) using estimates of effective population size

604 changes from our MSMC analyses and a divergence time between the two specialists set to  
605 10,000 years, the age of the hypersaline lakes on SSI (Table S8). Significant regions were  
606 determined by calculating the  $f_d$  statistic across a genome simulated under a coalescent model  
607 with no gene flow and consisting of 150,000 windows, each containing the mean number of  
608 variants found across 50-kb windows in the empirical genomes. Empirical windows were  
609 considered candidate introgressed regions if the  $f_d$  statistic was above the maximum simulated  $f_d$   
610 value (Table S8). Consecutive 50-kb  $f_d$  outlier windows were merged to estimate the range in the  
611 sizes of introgressed regions to approximate the age of introgression events (Fig. 2D).

612

### 613 **Candidate adaptive variants underlying San Salvador Island specialist phenotypes**

614

615 In the specialists, we also looked for regions that appeared to be under strong divergent selection  
616 in the form of a hard selective sweep from the site frequency spectrum calculated with SweeD  
617 (v.3.3.4;(30)). In this calculation of the composite likelihood ratio (CLR) of a sweep, we  
618 incorporated our empirical estimate of the decrease in population size for each focal population  
619 estimated from MSMC analyses in 50-kb windows across scaffolds that were at least 100-kb in  
620 length (99 scaffolds; 85.6% of the genome). We also calculated CLR ratios across 100,000 scaffolds  
621 consisting of neutrally evolving sequences simulated with ms-move (29), controlling for the  
622 impact of the inferred population size decreases over time for each population from MSMC runs  
623 mentioned above (Fig. 1D; Table S7). The CLR ratios for the simulated datasets were then used  
624 to assess outlier CLR ratios from the empirical dataset. Regions with CLR ratios above the 95<sup>th</sup>  
625 percentile value of CLR from the neutral simulated dataset were considered candidate hard  
626 selective sweep regions (scale-eater: CLR > 5.28; molluscivore: CLR > 4.47; Table S7).  
627 Candidate hard selective sweep regions were also independently inferred for the five focal

628 Caribbean generalist populations (sample size  $\geq 10$ ) following the same method outlined above  
629 for the specialists (Table S7).

630  
631 Spatial distribution of candidate adaptive variants

632  
633 To determine candidate adaptive variants underlying the divergence observed on San Salvador  
634 Island, we looked for regions of the genome that contained signatures of strong genetic  
635 divergence and hard selective sweeps. Variants that were nearly fixed between the species on  
636 San Salvador ( $F_{st} \geq 0.95$ ) and located in a candidate selective sweep region (empirical CLR >  
637 demographic simulations CLR; Table S7) were considered candidate adaptive variants (Table  
638 S2-S3; Data S2-S3). We then surveyed all pupfish individuals sampled from outside these  
639 populations for the specialist allele at their respective candidate variant sites (e.g. whether or not  
640 the scale-eater allele was found in other populations across the Caribbean). Variants were then  
641 separated into two categories of genetic variation: *de novo* (the specialist allele was found only  
642 on San Salvador Island) or standing (the specialist allele was also found in at least one generalist  
643 population sampled outside of San Salvador Island). Standing genetic variation that was found in  
644 candidate introgression regions from the  $f_d$  tests for introgression (see Introgression section) was  
645 further parsed into the category of introgressed variation and separated by geographic region of  
646 introgression (North Carolina (NC), New Providence Island (NP), or Dominican Republic (DR)).  
647 Given the amount of candidate adaptive variation that exists as standing genetic variation across  
648 the Caribbean (Fig. 2A), we looked for how many of these candidate regions also showed  
649 evidence of hard selective sweeps in focal generalist populations outside of San Salvador Island  
650 and found that very few of these regions exhibited signatures of a hard selective sweeps outside  
651 of San Salvador Island populations (Fig. S3).

652

653 Adaptive introgression

654  
655 We examined all introgressed regions for evidence of hard selective sweeps on SSI and genetic  
656 divergence between trophic specialists, which would provide evidence that secondary gene flow  
657 brought in variation potentially important for speciation. We looked for overlap between the  $f_d$   
658 introgression outliers, SweeD selective sweep outliers, and whether these overlapping regions  
659 contained at least one of the nearly fixed variants ( $F_{st} \geq 0.95$ ) between specialists (31) (Table  
660 S10-S14).

661 We were interested in whether San Salvador Island specialist genomes exhibited more  
662 introgression in regions undergoing hard selective sweeps on SSI than other generalist  
663 populations. In the absence of a clear null expectation for the number of introgressed regions, we  
664 calculated the number of these candidate adaptive regions for the specialists that were also  
665 outlier  $f_d$  regions in other combinations of populations across the Caribbean (Table S9), to  
666 compare to the number of adaptive introgression regions observed in the specialists. Since  
667 several outgroup generalist populations had multiple values for the number of adaptive  
668 introgression regions (due to different combinations of sister lineages (P1) available for testing  
669 against: Table S9), only the average number of adaptive introgression regions per generalist  
670 population was shown for ease of visualization (Table S9; Fig. 3C). We then performed a Mann-  
671 Whitney U test to determine if the mean number of adaptive introgression regions in each  
672 specialist was greater than the mean from the rest of the Caribbean (Table S9A v. S9B and Table  
673 S9C v. S9D) and calculated 95% confidence intervals around these means using the `boot.ci`  
674 function in the R package `boot` (v1.3; Fig. 3C). Since neither of the SSI specialists appear to have  
675 experienced adaptive introgression from the Venezuela *C. dearborni* population, it was excluded



676 as a potential donor population for the focal generalist populations on other islands as well in  
677 these comparative analyses.

678  
679 Functional analysis of candidate adaptive variants

680  
681 *GO analysis of candidate variant regions*

682  
683 We performed gene ontology (GO) enrichment analyses for genes near candidate adaptive  
684 variants using ShinyGo (v.0.51;(32)). In the *C. brontotheroides* reference genome annotations  
685 (described in *de novo* genome assembly and annotation section), gene symbols largely match  
686 human gene symbols. Thus, we searched for enrichment across biological process ontologies  
687 curated for human gene functions.

688 For genes with focal GO terms (e.g. feeding behavior, muscle, mouth, eye and  
689 craniofacial development) relevant to stages of diversification in this system (i.e. habitat  
690 preference, trophic morphology, and pigmentation; Fig. 2C; Fig. 4; Table S4), we checked other  
691 annotation databases and studies for verification of putative function, including Phenoscape  
692 Knowledgebase (<https://kb.phenoscape.org/#/home>), NCBI's PubMed  
693 (<https://www.ncbi.nlm.nih.gov/pubmed>), and the Gene Ontology database using AMIGO2 (33) .

694 All genes had consistent annotations across databases, except *galr2*. *Galr2* was annotated for  
695 feeding behavior in the Biological Processes database (Ensemble 92), but to our knowledge, the  
696 most recent studies indicate that it does not play a role in feeding behavior (34, 35). Thus, we  
697 removed its annotation as a candidate gene for feeding behavior, but kept it as a candidate for  
698 trophic morphology.

699  
700 *Differential gene expression*

701

702 Additionally, we looked for overlap between genes associated with candidate variants and genes  
703 differentially expressed between the two specialists in whole embryos at two early  
704 developmental stages (2 and 8 days post-fertilization (dpf)) reported in a previous study (36).  
705 Tables with differentially expressed genes at 2 and 8 dpf from this study are provided in Data S4  
706 and S5.

707

### 708 *Morphometrics and caudal fin pigmentation*

709

710 We measured two key morphological traits associated with the major axes of phenotypic  
711 diversification in the SSI radiation, lower jaw length and nasal protrusion distance. Ethanol-  
712 preserved specimens from SSI were measured from external landmarks on the skull using digital  
713 calipers. Measurements were repeated on both lateral sides and averaged for each specimen.  
714 Lower jaw length was measured from the quadrate-articular jaw joint to the tip of the most  
715 anterior tooth on the dentary (Data S6). Nasal protrusion distance was measured by placing a  
716 tangent line from the dorsal surface of the neurocranium to the tip of the premaxilla and  
717 measuring the perpendicular distance that the nasal region protrudes from this tangent (Fig. S8A;  
718 Data S6). Each specimen was also measured for standard length using digital calipers in order to  
719 remove the effects of variation in body size on the craniofacial trait measurements among  
720 individuals and species. We log-transformed morphological measurements and regressed them  
721 against log-transformed standard length (Fig. S9; Data S6) and used the residuals for association  
722 mapping analyses.

723 The major axis of divergence in reproductive coloration and patterning between trophic  
724 specialists on SSI is the overall lightness or darkness of breeding males. Scale-eaters reach a  
725 nearly jet black coloration in the wild while guarding a breeding territory whereas molluscivore

726 males remain paler throughout their body and fins. This pair of sympatric specialists exceeds the  
727 lightness contrast in male reproductive breeding coloration observed across all other *Cyprinodon*  
728 pupfishes. Females of each species show the same general pattern of lightness/darkness. We  
729 detected no difference in the total number of melanocytes on the caudal, anal, or pectoral fins  
730 among the SSI species (data not shown). Instead, we found that scale-eater individuals were  
731 significantly darker on their caudal fins (two-tailed *t*-test,  $t=5.25$ ,  $df=45.5$ ,  $P$ -value=  $3.8 \times 10^{-6}$ ;  
732 Fig. 4B; Data S6), perhaps due to the larger melanocyte areas relative to molluscivores. We  
733 found similar patterns for anal and pectoral fins and used only caudal fin lightness values for  
734 GWAS (data not shown). A Meiji EMZ-8TR stereomicroscope with standardized external  
735 illumination and an OMAX 18 Mp digital microscope camera was used to take lateral  
736 photographs of the caudal fin of each individual against the same white reference background in  
737 each image (Fig. 4B;Data S6). Adobe Photoshop (Creative Cloud) was used to select a  
738 rectangular area from inside the caudal fin, not including the caudal peduncle region or terminal  
739 marginal band and measure the mean overall lightness of this region relative to a control region  
740 selected from the illuminated white background. Standardized caudal fin pigmentation was then  
741 calculated as the proportion of the caudal fin lightness value relative to the control background  
742 lightness value for downstream GWAS analyses.

743

#### 744 *Genome-wide association mapping analyses*

745

746 We employed a Bayesian Sparse Linear Mixed Model (BSLMM) implemented in the GEMMA  
747 software package (v. 0.94.1; (37)) to identify genomic regions associated with variation in lower  
748 oral jaw length, caudal fin pigmentation, and nasal protrusion distance. The BSLMM uses  
749 Markov Chain Monte Carlo sampling to estimate the proportion of phenotypic variation

750 explained by all SNPs included in the analysis (proportion of phenotypic variance explained  
751 (PVE);Fig. S10A-C), explained by SNPs of large effect (proportion of genetic variance  
752 explained by sparse effects (PGE); Fig. S10D-F), and the number of large-effect SNPs needed to  
753 explain PGE (nSNPs;Fig. S10G-I). GEMMA also estimates a posterior inclusion probability  
754 (PIP) for each SNP. We used PIP (the proportion of iterations in which a SNP is estimated to  
755 have a non-zero effect on phenotypic variation) to assess the significance of regions associated  
756 with jaw size variation. We performed 10 independent runs of the BSLMM using a step size of  
757 100 million with a burn-in of 50 million steps for three traits (lower oral jaw size ( $n = 78$ ), caudal  
758 fin pigmentation ( $n = 61$ ), and nasal protrusion distance ( $n = 65$ )). We chose to only include SSI  
759 individuals in these analyses given extensive Caribbean-wide population structure that could  
760 confound significant associations (Fig. 1C). We summed PIP parameter estimates across 20-kb  
761 windows to avoid dispersion of the posterior probability density across SNPs in linkage  
762 disequilibrium due to physical linkage. Independent runs were consistent in reporting the  
763 strongest associations for the same 20-kb windows. We identified regions with strong association  
764 with our traits of interests as ones that had a PIP score in the 99<sup>th</sup> percentile of PIP scores across  
765 all regions (Data S7-9). Our PIP estimates for strongly associated windows suggest that jaw  
766 length may be controlled predominantly by a few loci of moderate effect (see bimodal PGE  
767 distribution, Fig. S10H). This is consistent with a previous QTL mapping study in an  
768 F2 intercross between SSI trophic specialists which detected one significant QTL with moderate  
769 effects on oral jaw size explaining up to 15% of the variation and three to four additional  
770 potential quantitative trait loci (QTL) with similar moderate effects (38).

771

772 *QTL analysis for jaw size*

773

774 We also investigated candidate variants for effects on craniofacial morphology by overlapping  
775 scaffolds with a previously published linkage map and QTL analysis of an F2 intercross between  
776 specialist species (38). We overlapped markers from this study that spanned the 95% Bayesian  
777 credible interval for a significant QTL for lower jaw length (LG15; taken from Fig S2 in (38)).  
778 The fasta sequences for these two markers bookending the QTL region on a single scaffold were  
779 then blasted against the *Cyprinodon brontotheriodes* genome using the blastn function in  
780 BLAST+ (39) and we selected the result with the highest percent identity and lowest e-value  
781 (Table S5). We then looked at all the genic regions within the interval between these two  
782 markers to investigate overlap between the QTL region and the candidate variants in this current  
783 study. The top hits for overlap between the sequences of two markers that spanned the LG15  
784 QTL region and the *Cyprinodon brontotheriodes* reference genome showed that this QTL  
785 corresponds to a 18 Mb region on scaffold c\_bro\_v1\_0\_scaf8 (Table S5). However, this large  
786 region contained only a few candidate adaptive variants associated with the genes *map2k6* (3  
787 variants), *galr2* (2 variants), and *grid2ip* (4 variants).

788  
789  
790 Timing of divergence for candidate adaptive variants

791  
792 If adaptive diversification in this radiation of pupfishes followed the temporal stages hypothesis  
793 (habitat preference first, then trophic morphology, and finally sexual communication; (40)), we  
794 predicted an ordering of divergence times among candidate regions containing genes annotated  
795 for traits related to these axes of diversification, with regions containing genes related to habitat  
796 preference having older divergence times, followed by regions with genes related to trophic  
797 morphology, and finally regions with pigmentation genes having the youngest divergence times.  
798 In order to determine if there have been stages of adaptive diversification in this adaptive

799 radiation of pupfishes, we first estimated divergence times between molluscivores and scale-  
800 eaters for each candidate adaptive region (i.e. each 50 kb window containing signatures of a hard  
801 selective sweep in either specialist and a nearly fixed variant between specialists).

802 Many methods for estimating divergence times and allele ages rely on the pattern of  
803 variation in the haplotype background surrounding the allele of interest. Heuristic approaches,  
804 particularly those that use point estimates of number of derived mutations within a chosen  
805 distance of the site are accessible, quick ways to approximate divergence times among regions  
806 and allele ages without extensive haplotype data (41, 42). We estimated sequence divergence in  
807 regions surrounding candidate variants using  $D_{xy}$ , an absolute measure of genetic divergence. To  
808 get a heuristic estimate of divergence time between specialists at these regions, we used this  $D_{xy}$   
809 count of the number of variants that have accumulated between specialists and the approximation  
810 that the observed genetic differences between two lineages should be equal to  $2\mu t$ :  $t$ , the time  
811 since their divergence and  $\mu$ , the mutation rate (43). Using the per generation mutation rate  
812 estimated above ( $1.56 \times 10^{-8}$ ), we calculated the time since divergence for candidate regions and  
813 compared that time to the estimated 10-15 kya age of the radiation (based on estimates of the last  
814 period of drying of hypersaline lake basins on San Salvador Island during the last glacial  
815 maximum (44)).

816 We plotted the divergence time estimates for candidate adaptive regions by the spatial  
817 categories they were assigned to (de novo, introgression, standing genetic variation), and against  
818 a background of neutral regions that contained a nearly fixed variant, but no signature of a hard  
819 selective sweep (Fig 4, S5 and S11). So that each point in the plot was independent, we pruned  
820 variants by randomly selecting one from the group of variants that fell within the same 50-kb  
821 window. Some windows had multiple variants with different spatial distributions (e.g. de novo

822 vs. standing genetic variation), so to make sure all points on the figure were independent, we  
823 made alternative plots for alternative spatial distributions of variants that occurred within a single  
824 50 kb window (the smaller vs larger spatial distribution; Fig. 4 and Fig. S11). This applied to  
825 several variants that were characterized as either introgressed or standing genetic variation in  
826 four regions containing genes with relevant adaptive annotations (*galr2*, *gmp6a*, and *kcnk2*) from  
827 the plot with the smaller spatial distribution (Fig. 4). The alternative, larger spatial distribution  
828 (i.e. the regions containing these genes were assigned to the standing genetic variation column  
829 instead of the int rogression column) for each of these four annotated 50 kb windows is shown in  
830 Figure S11.

831 To look for stages of diversification along different trait axes, we matched regions to  
832 potential phenotypes in two ways: 1) from our GO enrichment analyses that implicated genes in  
833 the region as relevant to the major axes of adaptive radiation in this system (e.g. craniofacial  
834 development, pigmentation, feeding behavior), and 2) with regions strongly associated with  
835 either lower jaw size, nasal protrusion distance, or caudal fin pigmentation in the GWAS for San  
836 Salvador Island pupfish species. Regions associated with traits in the GWAS were then polarized  
837 for effects on trait values that were in directions relevant to each specialist. For scale-eaters, this  
838 meant filtering for regions with significant association with darker caudal fin pigmentation,  
839 larger lower oral jaws, and smaller nasal protrusion distances. For molluscivores, this meant  
840 filtering for regions with significant associations for lighter caudal fin pigmentation, larger lower  
841 oral jaws, and larger nasal protrusion distances. We found 23 regions containing genes with  
842 relevant GO terms and 24 regions containing variants significantly associated with traits in the  
843 GWAS.

844 Based on relevant GO terms, we found that regions with genes annotated for feeding  
845 behavior have some of the oldest divergence times (Fig 4A and S11) while regions with genes  
846 related to craniofacial morphology and pigmentation had younger divergence times (Fig 4A and  
847 S11). Similarly, we found younger divergence times among regions with genes annotated for  
848 traits related to trophic morphology based on GWAS annotations (Fig 4B).

849 Considering there are only 23 and 24 observations used to test for stages of adaptive  
850 diversification, we also checked that this pattern was statistically robust and not due to chance.  
851 First, we used linear models to determine if divergence times among adaptive variant regions  
852 could be predicted by the associated adaptive traits. In our first linear model used to test for  
853 stages, major GO categories relevant to divergent traits in this system (feeding behavior, eye,  
854 mouth, muscle, and craniofacial development) were used as the predictor variable and the rank  
855 ordering of divergence times was the response variable. We found that relevant GO categories  
856 significantly predicted the rank ordering of divergence times among regions ( $df=5$ ,  $F= 3.03$ ,  $P$ -  
857 value= 0.039). From this, we then tested all pairwise comparisons of different categories of  
858 relevant traits to determine which were driving the significant difference in ordering using  
859 Tukey's HSD test. For the stages of trait diversification based on relevant GO terms (feeding  
860 behavior, eye, mouth, muscle, and craniofacial development): diversification in feeding behavior  
861 was significantly older than mouth development ( $P = 0.022$ ), and moderately older than muscle  
862 and craniofacial development ( $P = 0.05$  for both). This conservative test supports a 'behavior-  
863 first' ordering to trait diversification in this system (45). Divergence in behavioral traits as a  
864 major stage of radiation in pupfish makes sense because both specialists are more aggressive  
865 than generalist species (46), and adaptive kinematic traits important for scale-eating performance  
866 are behaviorally mediated (47).



867 Evidence for the behavior first stage of adaptive diversification is largely driven by the  
868 fact that the two oldest divergences times occur in regions with genes annotated for feeding  
869 behavior. Therefore, we further investigated the probability that this ‘behavior first’ pattern could  
870 have occur by chance given our small sample size. We used a permutation test to calculate the  
871 probability of the two regions with the oldest divergence times both being related to feeding  
872 behavior can occur randomly. We first ranked the 23 candidate regions based on their  
873 corresponding age and randomly reassigned these rankings for each region 10,000 times. We  
874 then assessed how many of each of these iterations had the two regions with the oldest  
875 divergence times assigned to feeding behavior (as observed in the empirical data). We found that  
876 only 41 of the iterations matched the observed value, suggesting that the probability of observing  
877 the two regions with the oldest divergence times related to feeding behavior by chance alone is  
878 extremely small ( $P$ -value = 0.0041).

879 In our second linear model to test for stages of adaptive radiation, significant association  
880 with three key adaptive traits measured for our GWAS (lower oral jaw size, caudal fin  
881 pigmentation, and nasal protrusion distance) was used as the predictor variable and ordering of  
882 divergence times was the response variable. We found that GWAS trait association did not  
883 significantly predict the ordering of divergence times among regions ( $df=3$ ,  $F= 1.67$ ,  $P$ -value =  
884 0.197). However, this is qualitatively similar to our results from the GO analyses considering  
885 that we lack a behavioral trait related to feeding behavior in our GWAS analyses.

886

#### 887 Timing of selection for candidate adaptive variants

888

889 We also estimated the age of hard selective sweeps using the R package *McSwan* (v1.1.1;;  
890 <https://github.com/sunyatini/McSwan>; (48)). *McSwan* detects hard selective sweeps by comparing

891 local site frequency spectra (SFS) simulated under neutral and selective demographic models,  
892 which it uses to assign selective sweeps to regions of the genome and predict the age of selection  
893 events (48). By using information from the SFS, *McSwan* is advantageous for estimating  
894 selective sweep ages in non-model organisms because it does not require high quality haplotype  
895 data to detect sweeps and predict their ages. However, this flexibility comes at the cost of not  
896 jointly estimating the selection coefficient of a particular sweep, so it assumes the strength of  
897 selection is equal across all sweeps. With the input of a mutation rate estimate, neutral  
898 demographic model (effective population size changes, divergence events), and variant file,  
899 *McSwan* generates simulated and observed SFSs and a prior of sweep ages, whose upper bound  
900 is determine by the divergence time estimate specified in the demographic model (in our case:  
901 10,000 years). *McSwan* uses these simulated selective and neutral SFSs to scan the input variant  
902 file for selective sweep regions and produce a posterior distribution of sweep ages for each  
903 sweep region it detects.

904 To simulate SFSs, we used the mutation rate estimated above ( $1.56 \times 10^{-8}$ ), the same  
905 demographic models of changes in effective population sizes used in our SweeD runs for the  
906 generalists and scale-eater populations (Table S7), and a divergence time estimate between San  
907 Salvador Island generalist and scale-eater of 10,000 years (based on dating of last glacial  
908 maximum when the hypersaline lakes were dry on San Salvador Island). We first simulated  
909 neutral and selection SFSs that were each comprised of 2,000 simulations (default  
910 recommendation) across sequences 50-kb in length. To look for selective sweeps in the  
911 specialists, we then generated empirical SFSs from scans across the 500-kb region surrounding  
912 each of the 23 sets of candidate variants highlighted in Figure 4. In order to precisely determine  
913 the boundaries of hard selective sweep, *McSwan* iterates its genomic scans over adjacent

914 windows of various lengths and offsets and compares the empirical SFS to the simulated SFS  
915 under selection to assign regions as selective sweeps. We set up the iterative scans across these  
916 500-kb regions in sliding windows that ranged from 1000 bp to 200-kb in length and a minimum  
917 of 50 variants required per window. Each sliding scan of the 500-kb region was done in 100  
918 overlapping steps (default setting). We then looked for overlap between the regions detected as  
919 hard selective sweeps by McSwan to the candidate regions previously detected with SweeD and  
920  $F_{st}$  (Table S2-S3). For the scale-eater population only 9 of the 23 sets of candidate variants  
921 detected as hard selective sweeps using SweeD were also detected as hard selective sweeps using  
922 *McSwan* and given age estimates. In Tournebize et al. 2019 (48), investigations of McSwan's  
923 performance noted poor performance to detect selective sweeps when selection was relatively  
924 weak ( $s \leq 0.05$ ) and recent ( $\leq 16$  kya; Supplemental information Section 2 of (48)). Thus, the  
925 thirteen additional candidate adaptive regions undetected by McSwan may be under weaker  
926 selection or more recent. The candidate variants surrounding the consecutively spaced genes  
927 *cenpf* and *kcnk2* were detected as within the same selective sweep in *McSwan* and thus have the  
928 same age estimates (Fig. 4C and Fig. S12).

929 For these 8 regions, we then filtered these distributions of sweep ages for estimates that  
930 had a stability value (a parameter that represents the strength of support for a selective sweep  
931 model over a neutral model) in the 95<sup>th</sup> percentile. To get a likely range of selective sweep age  
932 estimates for each region, we calculated the 95% high posterior density (HPD) region with the R  
933 package HDIntervals (v0.2; <https://cran.r-project.org/web/packages/HDInterval/index.html>) from  
934 their respective posterior distributions. We repeated this process for the 6 sets of candidate  
935 regions found in the molluscivore, only three of which were also detected as being under a  
936 selective sweep in *McSwan* and given age estimates. The 95% HPD of these age estimates for

937 the scale-eater and molluscivore populations are presented in Figure 4C, S5 and Table S14 and  
938 the full posteriors are shown in Figure S12 and S13.

939

## 940 References

941

- 942 1. A. A. Echelle, E. W. Carson, A. F. Echelle, D. Bussche, T. E. Dowling, Historical  
943 Biogeography of the New-World Pupfish Genus *Cyprinodon* (Teleostei:  
944 Cyprinodontidae). *Copeia*. **2005**, 320–339 (2005).
- 945 2. E. J. Richards, C. H. Martin, Adaptive introgression from distant Caribbean islands  
946 contributed to the diversification of a microendemic adaptive radiation of trophic  
947 specialist pupfishes. *PLoS Genet.* **13**, 1–35 (2017).
- 948 3. M. R. Green, J. Sambrook, Isolation of high-molecular-weight DNA using organic  
949 solvents. *Cold Spring Harb. Protoc.* **2017**, 356–359 (2017).
- 950 4. J. R. Wang, J. Holt, L. McMillan, C. D. Jones, FMLRC: Hybrid long read error correction  
951 using an FM-index. *BMC Bioinformatics.* **19**, 1–11 (2018).
- 952 5. R. L. Warren, C. Yang, B. P. Vandervalk, B. Behsaz, A. Lagman, S. J. M. Jones, I. Birol,  
953 LINKS: Scalable, alignment-free scaffolding of draft genomes with long reads.  
954 *Gigascience.* **4** (2015), doi:10.1186/s13742-015-0076-3.
- 955 6. N. C. Durand, M. S. Shamim, I. Machol, S. S. P. Rao, M. H. Huntley, E. S. Lander, E. L.  
956 Aiden, Juicer Provides a One-Click System for Analyzing Loop-Resolution Hi-C  
957 Experiments. *Cell Syst.* **3**, 95–98 (2016).
- 958 7. O. Dudchenko, S. S. Batra, A. D. Omer, S. K. Nyquist, M. Hoeger, N. C. Durand, M. S.  
959 Shamim, I. Machol, E. S. Lander, A. P. Aiden, E. L. Aiden, *Science (80-. )*, in press,  
960 doi:10.1126/science.aal3327.
- 961 8. R. Vaser, I. Sovic, N. Nagarajan, Š. Mile, Fast and accurate de novo genome assembly  
962 from long uncorrected reads. *Genome Res.*, 1–10 (2017).
- 963 9. F. A. Simão, R. M. Waterhouse, P. Ioannidis, E. V Kriventseva, E. M. Zdobnov, BUSCO:  
964 assessing genome assembly and annotation completeness with single-copy orthologs.  
965 *Bioinformatics.* **31**, 3210–3212 (2015).
- 966 10. B. L. Cantarel, I. Korf, S. M. C. Robb, G. Parra, E. Ross, B. Moore, C. Holt, A. S.  
967 Alvarado, M. Yandell, MAKER: An easy-to-use annotation pipeline designed for  
968 emerging model organism genomes. *Genome Res.* **18**, 188–196 (2008).
- 969 11. E. S. Lencer, W. C. Warren, R. Harrison, A. R. McCune, The *Cyprinodon variegatus*  
970 genome reveals gene expression changes underlying differences in skull morphology  
971 among closely related species. *BMC Genomics.* **18**, 424 (2017).
- 972 12. H. Li, R. Durbin, Inference of human population history from individual whole-genome  
973 sequences. *Nature.* **475**, 493–496 (2011).
- 974 13. M. A. DePristo, E. Banks, R. Poplin, K. V Garimella, J. R. Maguire, C. Hartl, A. A.  
975 Philippakis, G. del Angel, M. A. Rivas, M. Hanna, A. McKenna, T. J. Fennell, A. M.  
976 Kernysky, A. Y. Sivachenko, K. Cibulskis, S. B. Gabriel, D. Altshuler, M. J. Daly, A  
977 framework for variation discovery and genotyping using next-generation DNA sequencing  
978 data. *Nat. Genet.* **43**, 491–8 (2011).
- 979 14. C. D. Marsden, Y. Lee, K. Kreppel, A. Weakley, A. Cornel, H. M. Ferguson, E. Eskin, G.

- 980 C. Lanzaro, Diversity, differentiation, and linkage disequilibrium: prospects for  
981 association mapping in the malaria vector *Anopheles arabiensis*. *G3 (Bethesda)*. **4**, 121–31  
982 (2014).
- 983 15. P. Danecek, A. Auton, G. Abecasis, C. A. Albers, E. Banks, M. A. DePristo, R. E.  
984 Handsaker, G. Lunter, G. T. Marth, S. T. Sherry, G. McVean, R. Durbin, 1000 Genomes  
985 Project Analysis Group, The variant call format and VCFtools. *Bioinformatics*. **27**, 2156–  
986 2158 (2011).
- 987 16. S. Purcell, B. Neale, K. Todd-Brown, L. Thomas, M. A. R. Ferreira, D. Bender, J. Maller,  
988 P. Sklar, P. I. W. de Bakker, M. J. Daly, P. C. Sham, PLINK: A Tool Set for Whole-  
989 Genome Association and Population-Based Linkage Analyses. *Am. J. Hum. Genet.* **81**,  
990 559–575 (2007).
- 991 17. D. H. Alexander, J. Novembre, K. Lange, Fast model-based estimation of ancestry in  
992 unrelated individuals. *Genome Res.* **19**, 1655–1664 (2009).
- 993 18. S. H. Martin, J. W. Davey, C. D. Jiggins, Evaluating the use of ABBA-BABA statistics to  
994 locate introgressed loci. *Mol. Biol. Evol.* **32**, 244–257 (2015).
- 995 19. F. L. Wu, A. Strand, C. Ober, J. D. Wall, P. Moorjani, M. Przeworski, A comparison of  
996 humans and baboons suggests germline mutation rates do not track cell divisions. *bioRxiv*,  
997 844910 (2019).
- 998 20. M. Malinsky, H. Svardal, A. M. Tyers, E. A. Miska, M. J. Genner, G. F. Turner, R.  
999 Durbin, Whole-genome sequences of Malawi cichlids reveal multiple radiations  
1000 interconnected by gene flow. *Nat. Ecol. Evol.* **2**, 1940–1955 (2018).
- 1001 21. C. Feng, M. Pettersson, S. Lamichhaney, C. J. Rubin, N. Rafati, M. Casini, A. Folkvord,  
1002 L. Andersson, Moderate nucleotide diversity in the Atlantic herring is associated with a  
1003 low mutation rate. *Elife*. **6**, 1–14 (2017).
- 1004 22. A. F. Kautt, G. Machado-Schiaffino, A. Meyer, Multispecies Outcomes of Sympatric  
1005 Speciation after Admixture with the Source Population in Two Radiations of Nicaraguan  
1006 Crater Lake Cichlids. *PLoS Genet.* **12**, 1–33 (2016).
- 1007 23. B. Guo, F. J. J. Chain, E. Bornberg-Bauer, E. H. Leder, J. Merilä, Genomic divergence  
1008 between nine- and three-spined sticklebacks. *BMC Genomics*. **14**, 756 (2013).
- 1009 24. C. H. Martin, J. E. Crawford, B. J. Turner, L. H. Simons, Diabolical survival in Death  
1010 Valley: recent pupfish colonization, gene flow and genetic assimilation in the smallest  
1011 species range on earth. *Proc. R. Soc. B Biol. Sci.* **283**, 20152334 (2016).
- 1012 25. C. H. Martin, K. Gould, C. Bocklage, Surprising spatiotemporal stability and frequency-  
1013 independence across multiple fitness peaks driving adaptive radiation in the wild (2019).
- 1014 26. S. Schiffels, R. Durbin, Inferring human population size and separation history from  
1015 multiple genome sequences. *Nat. Genet.* **46**, 919 (2014).
- 1016 27. K. Nadachowska-Brzyska, R. Burri, L. Smeds, H. Ellegren, PSMC analysis of effective  
1017 population sizes in molecular ecology and its application to black-and-white *Ficedula*  
1018 flycatchers. *Mol. Ecol.* **25**, 1058–1072 (2016).
- 1019 28. J. K. Pickrell, J. K. Pritchard, Inference of Population Splits and Mixtures from Genome-  
1020 Wide Allele Frequency Data. *PLoS Genet.* **8**, e1002967 (2012).
- 1021 29. D. Garrigan, A. Geneva, msmove: A modified version of Hudson’s coalescent simulator  
1022 ms allowing for finer control and tracking of migrant genealogies (2014), ,  
1023 doi:10.6084/m9.figshare.1060474.
- 1024 30. P. Pavlidis, D. Živković, A. Stamatakis, N. Alachiotis, SweeD: Likelihood-based  
1025 detection of selective sweeps in thousands of genomes. *Mol. Biol. Evol.* **30**, 2224–2234

- 1026 (2013).
- 1027 31. E. J. Richards, M. R. Servedio, C. H. Martin, Searching for Sympatric Speciation in the  
1028 Genomic Era. *BioEssays*. **41**, 1900047 (2019).
- 1029 32. S. X. Ge, D. Jung, ShinyGO: a graphical enrichment tool for animals and plants. *bioRxiv*,  
1030 2 (2018).
- 1031 33. E. Balsa-Canto, D. Henriques, A. Gabor, J. R. Banga, AMIGO2, a toolbox for dynamic  
1032 modeling, optimization and control in systems biology. *Bioinformatics*. **32**, 1–2 (2016).
- 1033 34. M. E. Anderson, J. Runesson, I. Saar, Ü. Langel, J. K. Robinson, Galanin, through GalR1  
1034 but not GalR2 receptors, decreases motivation at times of high appetitive behavior. *Behav.*  
1035 *Brain Res.* **239**, 90–93 (2013).
- 1036 35. S. Wang, L. Ghibaudi, T. Hashemi, C. He, C. Strader, M. Bayne, H. Davis, J. J. Hwa, The  
1037 GalR2 galanin receptor mediates galanin-induced jejunal contraction, but not feeding  
1038 behavior, in the rat: Differentiation of central and peripheral effects of receptor subtype  
1039 activation. *FEBS Lett.* **434**, 277–282 (1998).
- 1040 36. J. A. McGirr, C. H. Martin, Parallel evolution of gene expression between trophic  
1041 specialists despite divergent genotypes and morphologies, 62–75 (2018).
- 1042 37. X. Zhou, P. Carbonetto, M. Stephens, Polygenic modeling with bayesian sparse linear  
1043 mixed models. *PLoS Genet.* **9**, e1003264 (2013).
- 1044 38. C. H. Martin, P. A. Erickson, C. T. Miller, The genetic architecture of novel trophic  
1045 specialists: higher effect sizes are associated with exceptional oral jaw diversification in a  
1046 pupfish adaptive radiation. *Mol. Ecol.* **26**, 624–638 (2017).
- 1047 39. C. Camacho, G. Coulouris, V. Avagyan, N. Ma, J. Papadopoulos, K. Bealer, T. L.  
1048 Madden, BLAST+: Architecture and applications. *BMC Bioinformatics*. **10**, 1–9 (2009).
- 1049 40. T. J. Streebman, P. D. Danley, The stages of vertebrate evolutionary radiation. *Trends*  
1050 *Ecol. Evol.* **18**, 126–131 (2003).
- 1051 41. R. R. Hudson, The Variance of Coalescent Time Estimates from DNA Sequences. *J. Mol.*  
1052 *Evol.* **64**, 702–705 (2007).
- 1053 42. G. Coop, K. Bullaughey, F. Luca, M. Przeworski, The Timing of Selection at the Human  
1054 FOXP2 Gene. *Mol. Biol. Evol.* **25**, 1257–1259 (2008).
- 1055 43. N. Masatoshi, Genetic distance between populations. *Am. Nat.* **106**, 283–292 (1972).
- 1056 44. F. M. Hagey, J. . Mylroie, Pleistocene lake and lagoon deposits, San Salvador Island,  
1057 Bahamas. *Geol. Soc. Am.* **30**, 77–90 (1995).
- 1058 45. R. B. Huey, P. E. Hertz, B. Sinervo, Behavioral drive versus behavioral inertia in  
1059 evolution: A null model approach. *Am. Nat.* **161**, 357–366 (2003).
- 1060 46. M. E. St. John, J. A. McGirr, C. H. Martin, The behavioral origins of novelty: did  
1061 increased aggression lead to scale-eating in pupfishes? *Behav. Ecol.* (2018),  
1062 doi:10.1093/beheco/ary196.
- 1063 47. M. E. St. John, C. H. Martin, Scale-eating specialists evolved adaptive feeding kinematics  
1064 within a microendemic radiation of San Salvador Island pupfishes. *bioRxiv*. **648451**,  
1065 648451 (2019).
- 1066 48. R. Tournebize, V. Poncet, M. Jakobsson, Y. Vigouroux, S. Manel, McSwan: A joint site  
1067 frequency spectrum method to detect and date selective sweeps across multiple population  
1068 genomes. *Mol. Ecol. Resour.* **19**, 283–295 (2019).
- 1069 49. M. M. Stevenson, Karyomorphology of Several Species of Cyprinodon. *Copeia*, 494–498  
1070 (1981).
- 1071 50. Y. Ofra, B. Rost, ISIS: Interaction sites identified from sequence. *Bioinformatics*. **23**,

- 1072 13–16 (2007).  
1073 51. E. V. Davydov, D. L. Goode, M. Sirota, G. M. Cooper, A. Sidow, S. Batzoglou,  
1074 Identifying a high fraction of the human genome to be under selective constraint using  
1075 GERP++. *PLoS Comput. Biol.* **6** (2010), doi:10.1371/journal.pcbi.1001025.  
1076 52. M. Nei, W. H. Li, *Proc. Natl. Acad. Sci.*, in press, doi:10.1073/pnas.76.10.5269.  
1077

1078

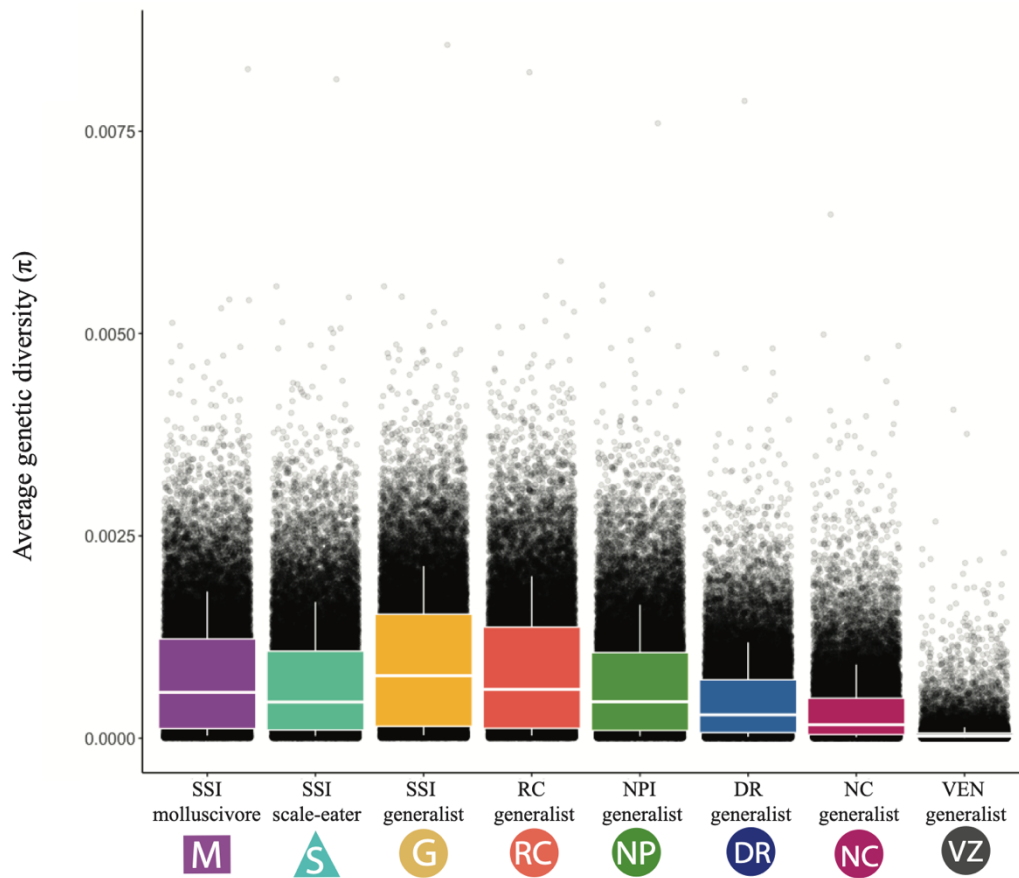

1079

1080

**Fig. S1.**

1081

1082

1083

1084

1085

1086

**Average genetic diversity is similar across Caribbean pupfish populations.** Within population ( $\pi$ ) nucleotide diversity in 50-kb sliding windows across the genomes of the San Salvador Island (SSI) species and generalist species on Rum Cay (RC), New Providence Island (NPI), Dominican Republic (DR), North Carolina (NC) and Venezuela (VZ).  $\pi$  values are averaged across 100 random samples of 10 individuals from each population in order to down-sample from populations with larger sample sizes and compare  $\pi$  across populations.



1087

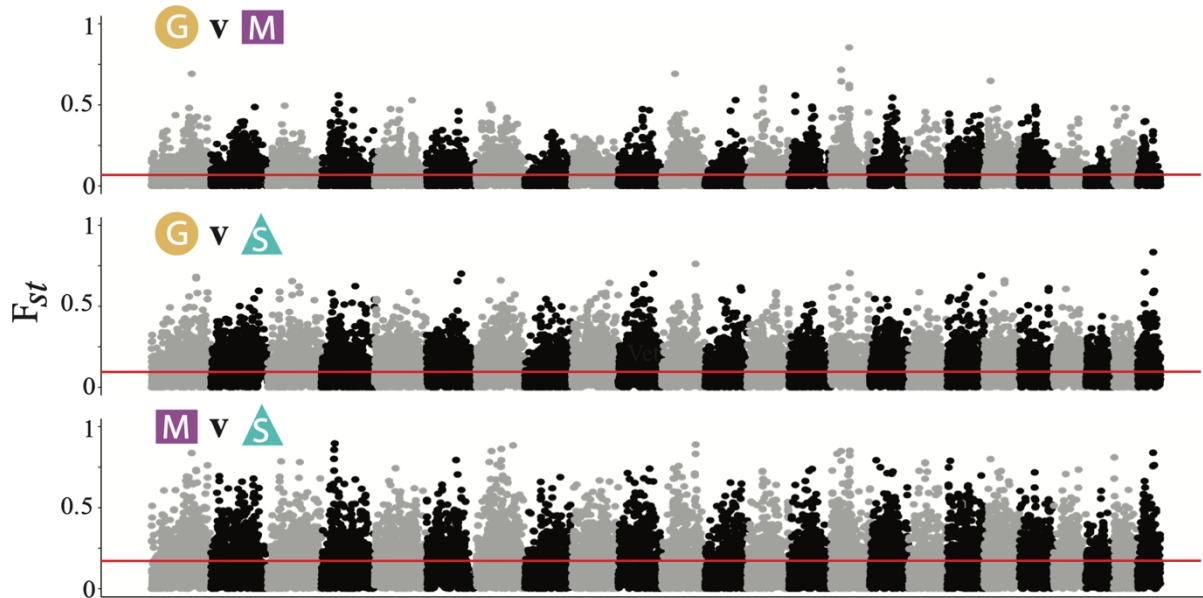

1088

1089

**Fig. S2.**

1090

1091

1092

1093

1094

**Genetic divergence among SSI species.** Manhattan plot of  $F_{st}$  in 50-kb windows across the genome for the three SSI species on the largest 24 scaffolds in the molluscivore (*C. brontotheroides*) genome corresponding to the 24 chromosomes in *Cyprinodon* (49). Solid red line represents the average  $F_{st}$  values for each comparison (generalist vs. molluscivore; 0.07; generalist vs. scale-eater: 0.11; molluscivore vs. scale-eater: 0.15).

1095

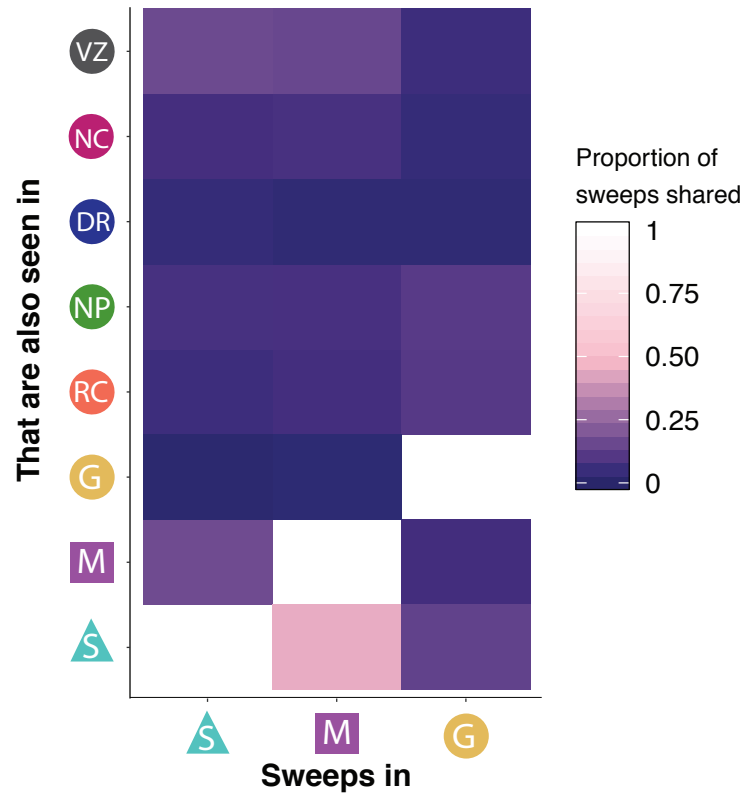

1096

1097

**Fig. S3.**

**Selective sweeps in SSI population shared with other Caribbean populations.** The proportion of hard selective sweeps in the SSI species that are also found sweeping in other Caribbean populations. Note that 42% of selective sweeps in the molluscivore population also showed signs of a sweep in the scale-eater population.

1098

1099

1100

1101

A

```

Generalist 1 MSEENLGEESGSSPVSPVDSLNSSEGEPAKQPKRGGGRKRRTSRKSGDDSDSPTPGKR GK 60
Scale-eater 1 MSEENLGEESGSSPVSPVDSLNSSEGEPAKQPKRGGGRKRRTSRKSGDDSDSPTPGKR GK 60

Generalist 61 KSGSSS[Q]SFEELQSQRVMANVRERQRTQSLNEAFAALRKIIPTLPSDKLSKIQTLKLA A 120
Scale-eater 61 KSGSSS[Q]SFEELQSQRVMANVRERQRTQSLNEAFAALRKIIPTLPSDKLSKIQTLKLA A 120

Generalist 121 RYIDFLCQVLQSDDELDSKMSSCSYVAHERLSYAFSVWRMEGAWSMSTSH*
Scale-eater 121 RYIDFLCQVLQSDDELDSKMSSCSYVAHERLSYAFSVWRMEGAWSMSTSH*
    
```

B

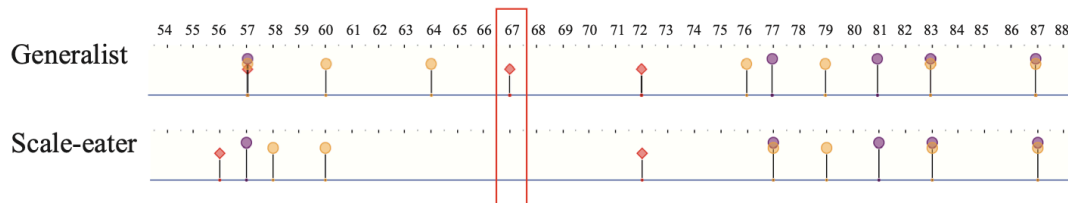

C

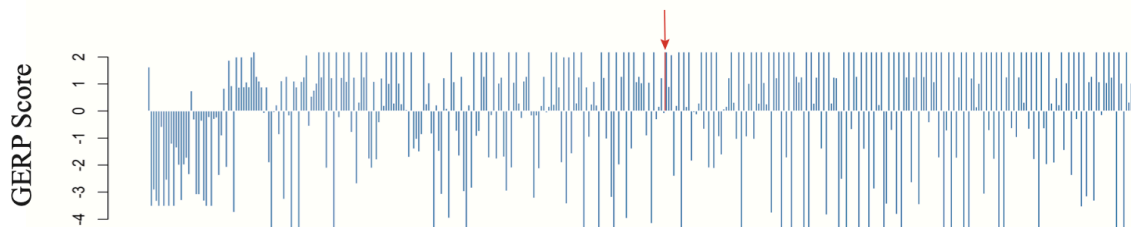

1102  
1103  
1104  
1105  
1106  
1107  
1108  
1109  
1110  
1111  
1112

**Fig. S4.**

**Sequence conservation among fishes around candidate gene *twist1*.** A) Amino acid sequence of *twist1* protein for SSI generalists and scale-eaters. The non-synonymous substitution that is nearly fixed between the two species changes the amino acid from a proline to histidine (highlighted in black). B) This amino acid substitution alters a protein binding site (highlighted in red box) predicted and visualized with Predict Protein Open (<https://open.predictprotein.org>) using the machine-learning prediction method PPsites2 (50). C) GERP scores for the 500 base pair region surrounding the non-synonymous coding substitution in *twist1* (red arrow) found only on SSI. Conservation scores were obtained from aligning scale-eater genomes to the 60 fish EPO low coverage genome alignment on Ensembl (release 98) and a conservation score above 2 is considered highly conserved (51).

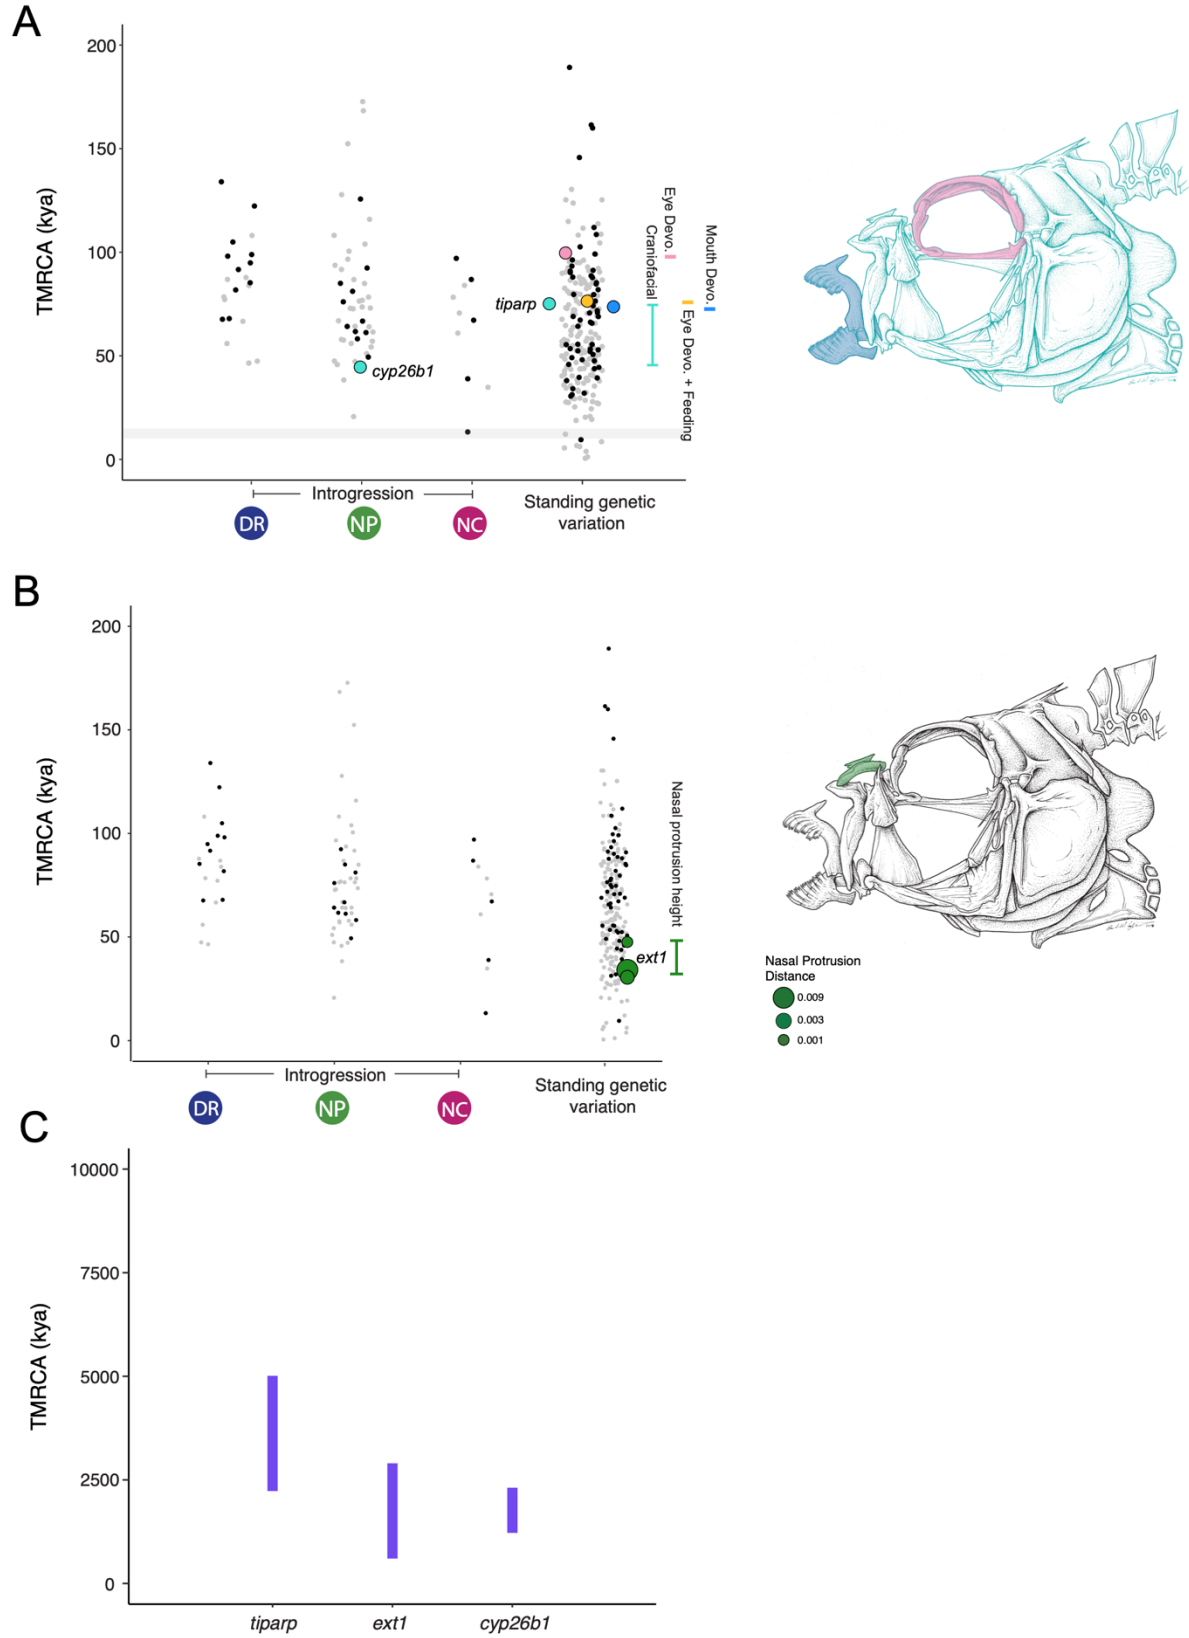

1114  
1115  
1116  
1117  
1118  
1119  
1120  
1121  
1122  
1123  
1124  
1125  
1126  
1127  
1128  
1129  
1130  
1131  
1132  
1133

**Fig. S5.**

**The spatiotemporal landscape of genetic variation for the molluscivore.** Time to most recent common ancestor (TMRCA) of the region surrounding candidate adaptive variants (LD-pruned so that each point is independent) based on relative genetic divergence metric  $D_a$  (52) which captures only the amount divergence that has accumulated since the two populations diverged. Variants are separated by spatial distribution into: introgressed from a single population and standing genetic variation observed in more than two populations. No variants existed as de novo variation in the molluscivore populations on SSI. No nearly fixed variants introgressed from the Venezuela population. Points are colored by their adaptive relevance to this system (black points: adaptive variants annotated for non-focal GO terms or unannotated; gray points: nearly fixed variants between specialists that are not under hard selective sweeps). A) All variants annotated for GO categories from the Biological Processes database (Ensemble 92) for feeding behavior, muscle, eye, and mouth development, or craniofacial (mouth and/or eye, muscle) are shown. B) All variants in the 99<sup>th</sup> percentile of PIP scores for association with either smaller oral jaw size, lighter caudal fin pigmentation, or premaxillary nasal protrusion from GWAS are shown. Dot sizes represent PIP score of each GWAS hit within a trait. C) The 95% high posterior density of the posterior distribution of ages of selective sweeps in focal gene regions. Focal regions are colored based on GO and GWAS annotations relevant to the stages of adaptive radiation hypothesis: habitat preference (feeding behavior: red), trophic morphology (craniofacial and muscle: blue-violet), and sexual communication (pigmentation: orange).

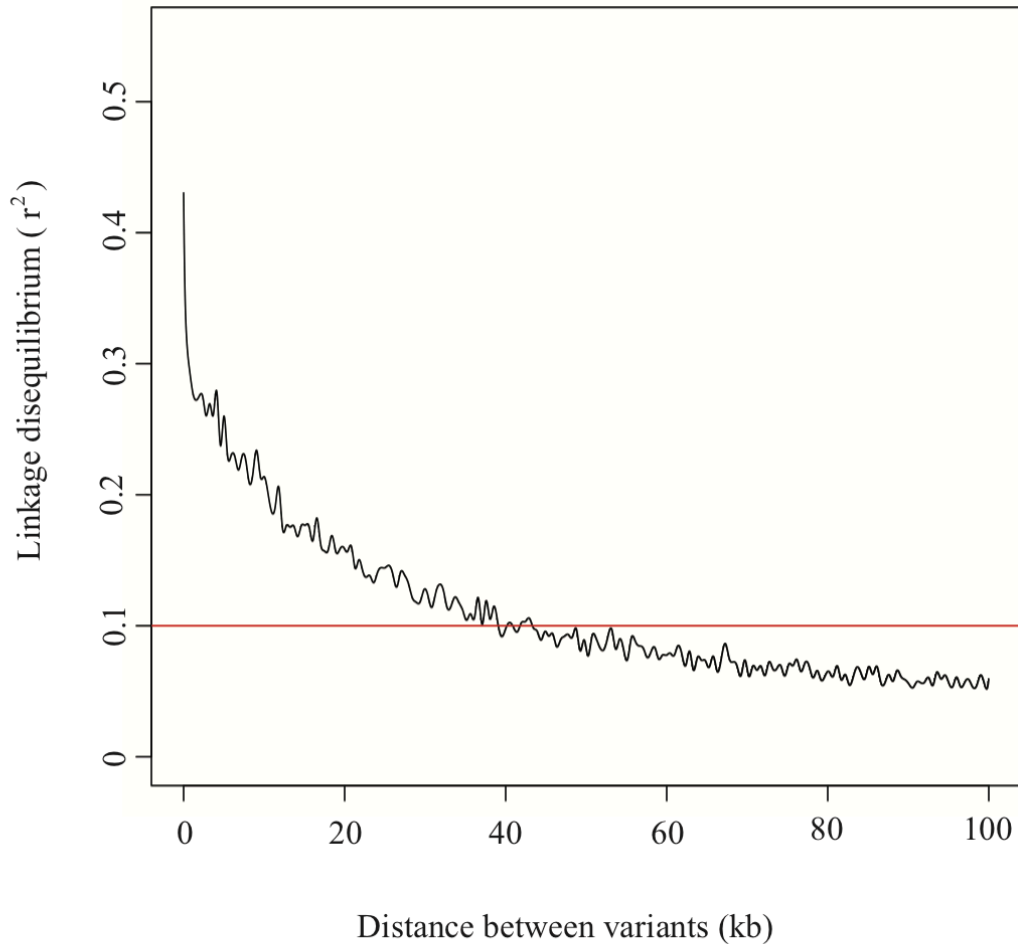

1134  
1135  
1136  
1137  
1138  
1139

**Fig. S6.**

**Linkage disequilibrium decay along the genome.** LD decay over pairwise combinations of variants within 100 kb of each other on the longest scaffold in the genome (49,059,223 bp), with  $r^2=0.1$  marked for reference. From this pattern of decay, we chose a window size of 50-kb for sliding windows analyses used in this study.

1140

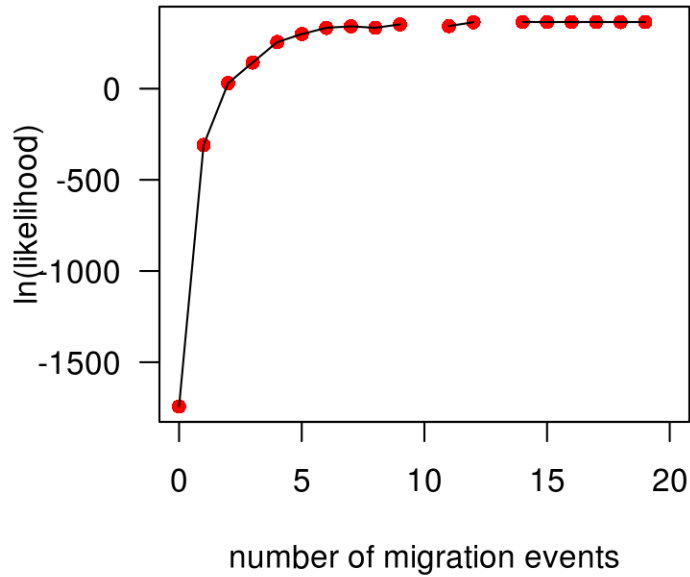

1150

1159

1160

**Fig. S7.**

1161

**The log likelihood of number of migration events on the population graph inferred using TREEMIX (28). The rate of change in the likelihood began to decline after three migration events, so three migration arrows were included in the population graph in Fig. 4B.**

1163

1164

1165

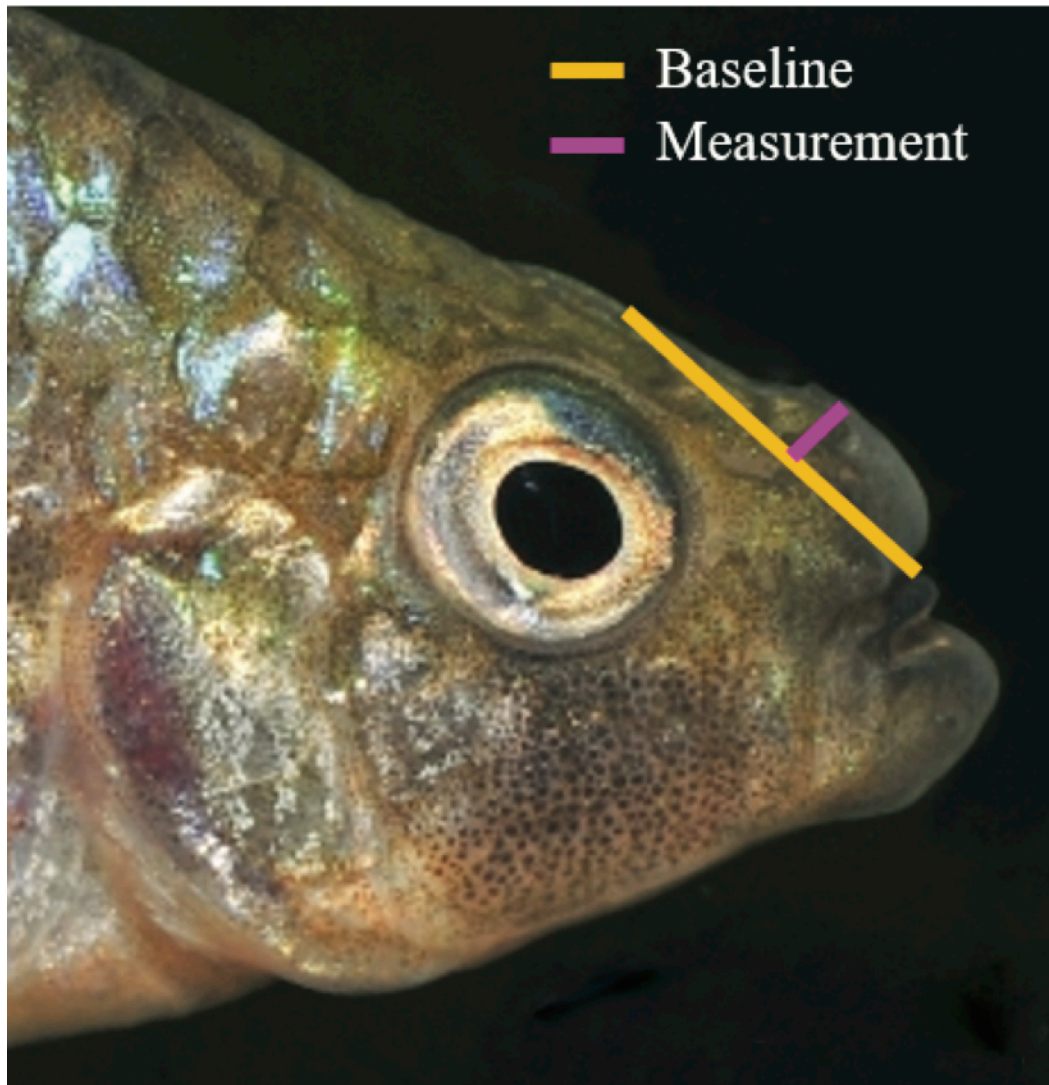

1166  
1167  
1168  
1169

**Fig S8. Example image of nasal protrusion distance measurement for GWAS.** The Purple line represents the nasal protrusion distance. The yellow line represents a baseline tangent line from the dorsal surface of the neurocranium to the tip of the premaxilla used for reference.



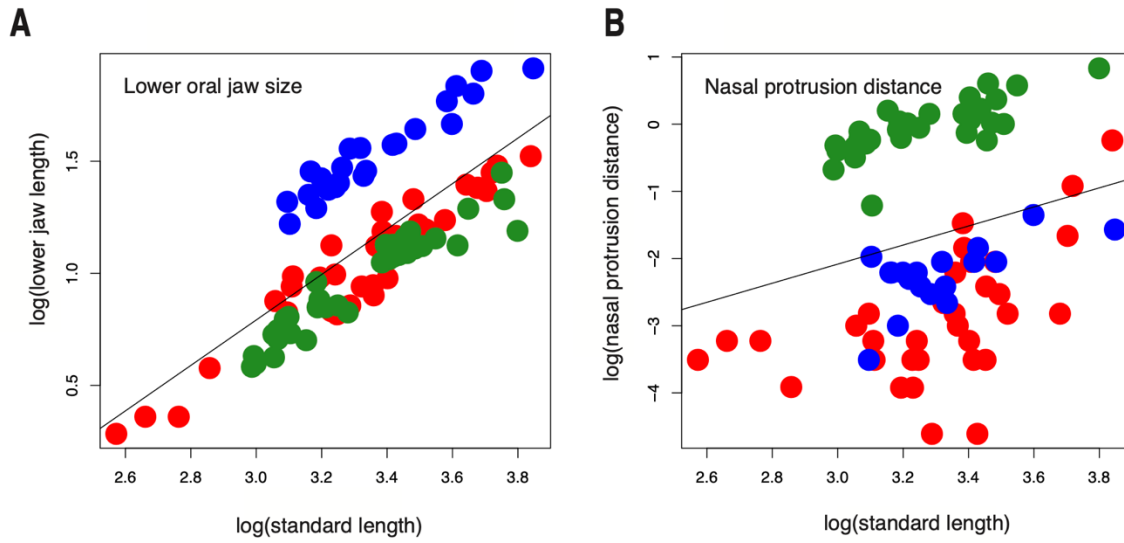

1170  
1171  
1172  
1173  
1174  
1175

**Fig. S9. Standardized craniofacial trait measurements in SSI species.** Log-transformed A) lower oral jaw length (mm) and B) nasal protrusion distance (mm) standardized by log-transformed standard length (mm) for SSI generalist (red), molluscivore (green), and scale-eater (blue).

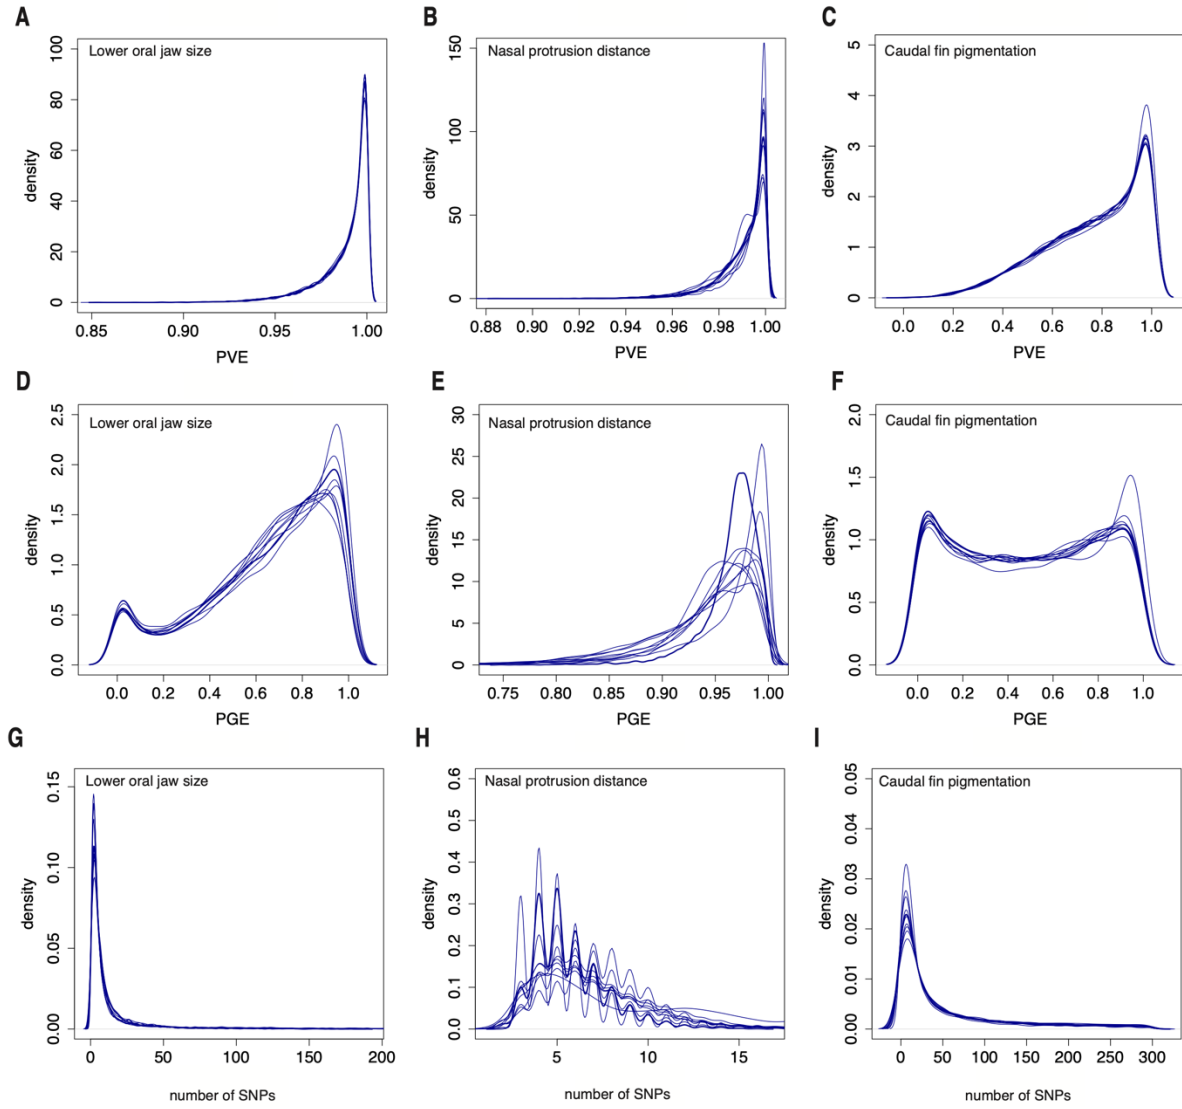

1176  
1177  
1178  
1179  
1180  
1181  
1182  
1183  
1184  
1185

**Fig. S10.**

**Posterior density distributions for hyper-parameters describing the proportion of variance in phenotypes for the three focal traits (lower jaw size, nasal protrusion distance, and caudal fin pigmentation) explained by A-C) every SNP (proportion of phenotype variance explained ( PVE)), D-F) SNPs of large effect (proportion of genetic variance explained by sparse effects) PGE), and G-H) the number of large effect SNPs required to explain PGE. Individual lines represent 10 independent MCMC runs of GEMMA's Bayesian sparse linear mixed model.**

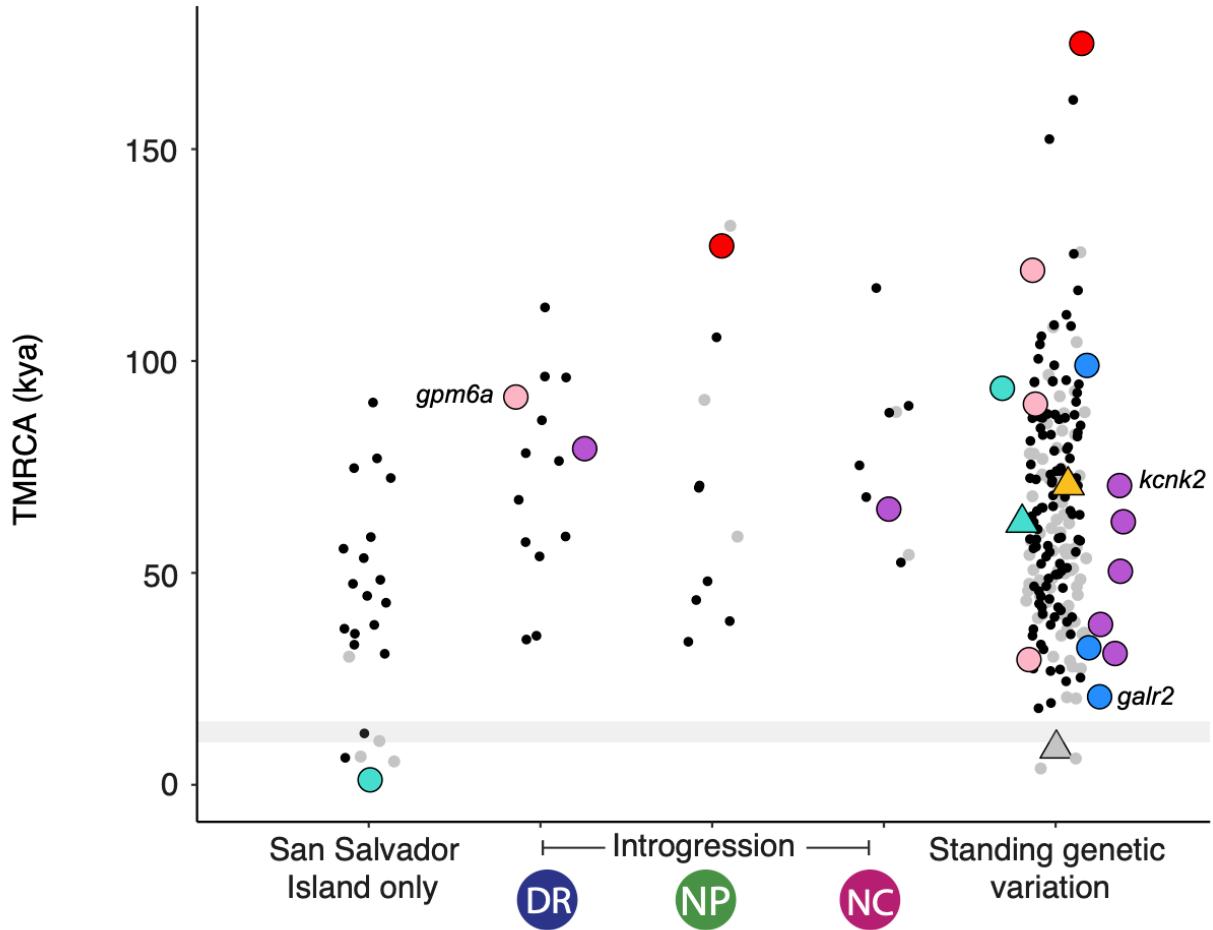

1186  
1187  
1188  
1189  
1190  
1191  
1192  
1193  
1194  
1195  
1196  
1197  
1198  
1199  
1200

**Fig. S11. The spatiotemporal landscape of adaptive radiation from the perspective of the alternative allele (larger spatial distribution).** Time to most recent common ancestor (TMRCA) of the region surrounding candidate adaptive variants (LD-pruned so that each point is independent) based on relative genetic divergence metric  $D_{xy}$  (52) which captures only the amount divergence that has accumulated since the two populations diverged. Variants are separated by spatial distribution into: de novo, introgressed from a single population and standing genetic variation observed in more than two populations. No nearly fixed variants introgressed from the Venezuela population. Points are colored by significantly enriched GO terms chosen for their adaptive relevance to this system (black points: adaptive variants annotated for non-focal GO terms or unannotated; gray points: nearly fixed variants between specialists that are not under hard selective sweeps) and triangle points represent those variants also associated with pigmentation. All variants annotated for GO categories from the Biological Processes database (Ensemble 92) for feeding behavior, muscle, eye, and mouth development, or craniofacial (mouth and/or eye, muscle) are shown. Points labeled with gene names indicate the three regions which have alternative spatial distributions shown in Fig. 4.

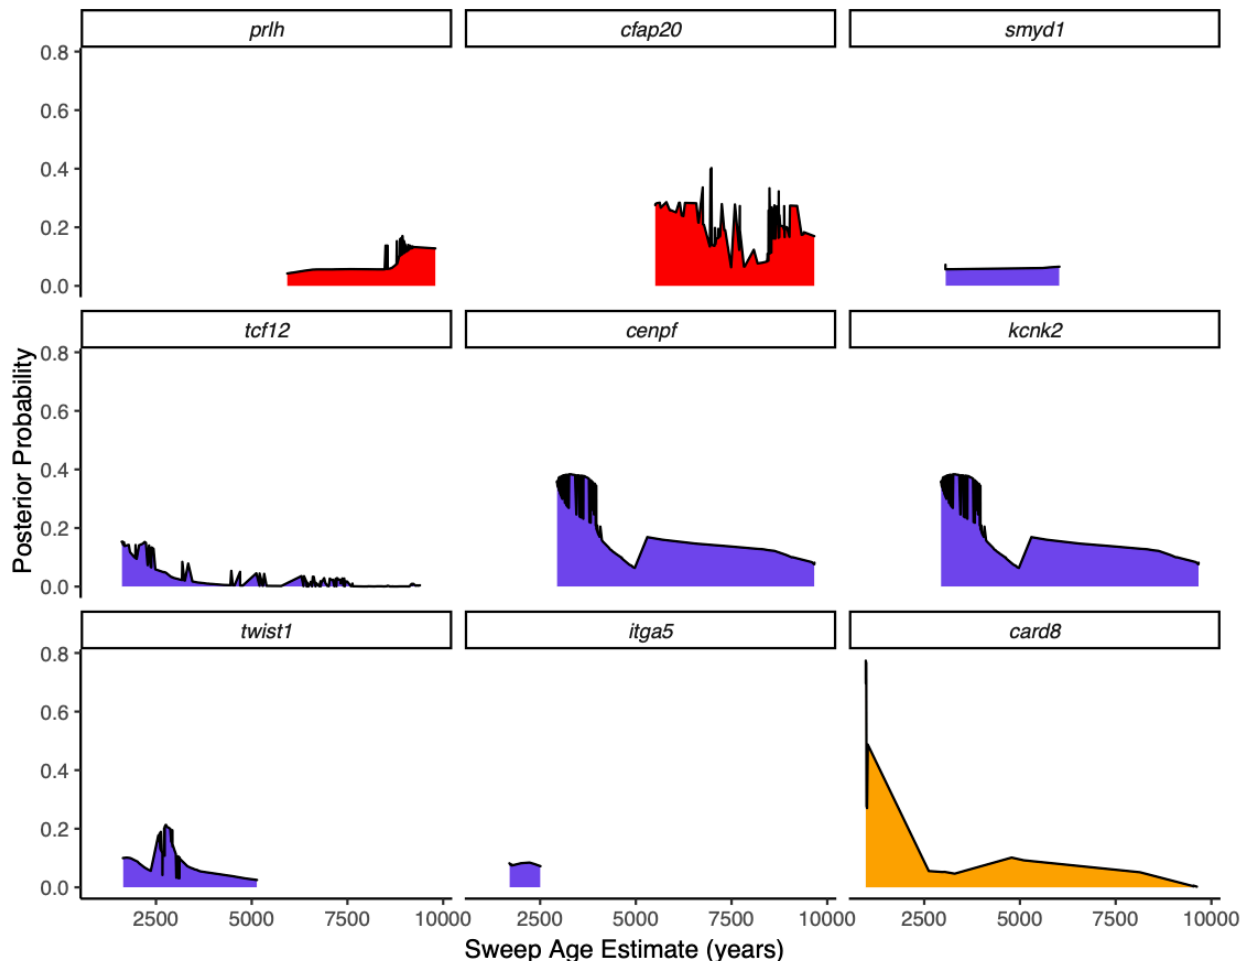

**Fig. S12. Posterior distributions for scale-eater sweeps.** The posterior distributions of sweep ages estimated from focal regions (Table S13). These nine regions were found under a hard selective sweep using both SweeD and McSwan. Posterior distributions of ages were calculated in McSwan. Focal regions are colored based on GO and GWAS annotations relevant to the stages proposed in the stages of adaptive radiation hypothesis: habitat preference (feeding behavior: red), trophic morphology (craniofacial and muscle: blue-violet), and sexual communication (pigmentation: orange).

1201  
1202  
1203  
1204  
1205  
1206  
1207  
1208  
1209  
1210

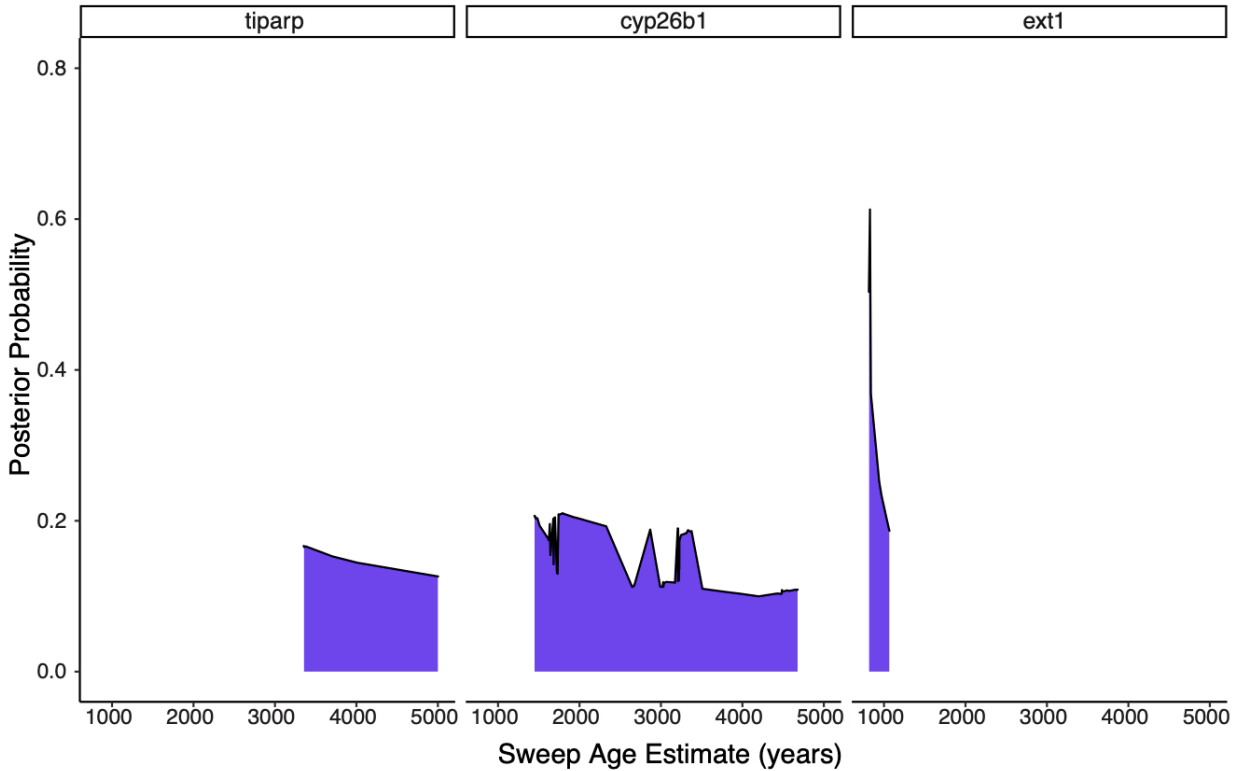

1211  
1212  
1213  
1214  
1215  
1216  
1217

**Fig. S13. Posterior distributions for molluscivore sweeps.** The posterior distributions of sweep ages estimated from focal regions (Table S13). These three regions were found under a hard selective sweep using both SweeD and McSwan. Posteriors distributions of ages were calculated in McSwan. Focal regions are colored based on GO and GWAS annotations relevant to the stages proposed in the stages of adaptive radiation hypothesis: trophic morphology (craniofacial and muscle: blue-violet).

1218  
1219  
1220  
1221  
1222  
1223

## Table S1.

**Summary of Caribbean pupfish sampling.** The sampling localities of individuals that were whole genome resequenced from San Salvador Island radiation (SSI), other *Cyprinodon* across the Caribbean, Mexico, and United States, and two outgroups. Full details including sample codes, collector identities, GPS coordinates are included in Data S1 table.

| Group            | Species                           | Lake/Site         | Island/Nation                | Sample size |
|------------------|-----------------------------------|-------------------|------------------------------|-------------|
| SSI generalist   | <i>Cyprinodon variegatus</i>      | Clear Pond        | San Salvador Island, Bahamas | 1           |
| SSI generalist   | <i>Cyprinodon variegatus</i>      | Crescent Pond     | San Salvador Island, Bahamas | 4           |
| SSI generalist   | <i>Cyprinodon variegatus</i>      | Granny Lake       | San Salvador Island, Bahamas | 1           |
| SSI generalist   | <i>Cyprinodon variegatus</i>      | Great Lake        | San Salvador Island, Bahamas | 2           |
| SSI generalist   | <i>Cyprinodon variegatus</i>      | Little Lake       | San Salvador Island, Bahamas | 1           |
| SSI generalist   | <i>Cyprinodon variegatus</i>      | Stout's Pond      | San Salvador Island, Bahamas | 2           |
| SSI generalist   | <i>Cyprinodon variegatus</i>      | Mermaid Pond      | San Salvador Island, Bahamas | 1           |
| SSI generalist   | <i>Cyprinodon variegatus</i>      | Moon Rock Pond    | San Salvador Island, Bahamas | 1           |
| SSI generalist   | <i>Cyprinodon variegatus</i>      | North Little Lake | San Salvador Island, Bahamas | 1           |
| SSI generalist   | <i>Cyprinodon variegatus</i>      | Osprey Lake       | San Salvador Island, Bahamas | 12          |
| SSI generalist   | <i>Cyprinodon variegatus</i>      | Oyster Lake       | San Salvador Island, Bahamas | 2           |
| SSI generalist   | <i>Cyprinodon variegatus</i>      | Oyster Lake       | San Salvador Island, Bahamas | 1           |
| SSI generalist   | <i>Cyprinodon variegatus</i>      | Pain Pond         | San Salvador Island, Bahamas | 1           |
| SSI generalist   | <i>Cyprinodon variegatus</i>      | Reckley Hill Pond | San Salvador Island, Bahamas | 1           |
| SSI generalist   | <i>Cyprinodon variegatus</i>      | Six Pack Pond     | San Salvador Island, Bahamas | 1           |
| SSI generalist   | <i>Cyprinodon variegatus</i>      | Wild Dilly Pond   | San Salvador Island, Bahamas | 1           |
| SSI molluscivore | <i>Cyprinodon brontotheroides</i> | Crescent Pond     | San Salvador Island, Bahamas | 12          |
| SSI molluscivore | <i>Cyprinodon brontotheroides</i> | Little Lake       | San Salvador Island, Bahamas | 5           |
| SSI molluscivore | <i>Cyprinodon brontotheroides</i> | Moon Rock Pond    | San Salvador Island, Bahamas | 6           |
| SSI molluscivore | <i>Cyprinodon brontotheroides</i> | Osprey Lake       | San Salvador Island, Bahamas | 12          |
| SSI molluscivore | <i>Cyprinodon brontotheroides</i> | Oyster Pond       | San Salvador Island, Bahamas | 8           |
| SSI scale-eater  | <i>Cyprinodon desquamator</i>     | Crescent Pond     | San Salvador Island, Bahamas | 10          |
| SSI scale-eater  | <i>Cyprinodon desquamator</i>     | Little Lake       | San Salvador Island, Bahamas | 5           |
| SSI scale-eater  | <i>Cyprinodon desquamator</i>     | Osprey Lake       | San Salvador Island, Bahamas | 10          |

|                                    |                                 |                                  |                                |    |
|------------------------------------|---------------------------------|----------------------------------|--------------------------------|----|
| SSI scale-eater                    | <i>Cyprinodon desquamator</i>   | Oyster Lake                      | San Salvador Island, Bahamas   | 1  |
| Dominican Republic                 | <i>Cyprinodon higuey</i>        | Laguna Bavaro                    | Dominican Republic             | 10 |
| New Providence Island              | <i>Cyprinodon laciniatus</i>    | Lake Cunningham                  | New Providence Island, Bahamas | 16 |
| Rum Cay                            | <i>Cyprinodon variegatus</i>    | Lake George - main lake          | Rum Cay, Bahamas               | 17 |
| North Carolina                     | <i>Cyprinodon variegatus</i>    | Fort Fisher estuary              | NC, USA                        | 11 |
| Venezuela                          | <i>Cyprinodon dearborni</i>     | Isla Margarita                   | Venezuela                      | 11 |
| Caribbean outgroup generalist      | <i>Cyprinodon artifrons</i>     | Cancun                           | Mexico                         | 2  |
| Caribbean outgroup generalist      | <i>Cyprinodon variegatus</i>    | North Salt Pond                  | Acklins Island, Bahamas        | 1  |
| Caribbean outgroup generalist      | <i>Cyprinodon dearborni</i>     | --                               | Bonaire                        | 1  |
| Caribbean outgroup generalist      | <i>Cyprinodon variegatus</i>    | --                               | Caicos Island                  | 1  |
| Caribbean outgroup generalist      | <i>Cyprinodon variegatus</i>    | Great Lake                       | Cat Island, Bahamas            | 1  |
| Caribbean outgroup generalist      | <i>Cyprinodon dearborni</i>     | --                               | Curacao                        | 2  |
| North American outgroup generalist | <i>Cyprinodon albivelis</i>     | Rio Yaqui basin                  | Mexico                         | 1  |
| North American outgroup generalist | <i>Cyprinodon eremus</i>        | Quitobaquito Spring              | AZ, USA                        | 1  |
| North American outgroup generalist | <i>Cyprinodon eximius</i>       | Rio Conchos basin                | Mexico                         | 1  |
| North American outgroup generalist | <i>Cyprinodon fontinalis</i>    | Ojo de Carbonera Spring          | Mexico                         | 1  |
| North American outgroup generalist | <i>Cyprinodon longidorsalis</i> | Charco Palma                     | Mexico                         | 1  |
| North American outgroup generalist | <i>Cyprinodon macularius</i>    | Coachella                        | CA, USA                        | 1  |
| North American outgroup generalist | <i>Cyprinodon macrolepis</i>    | Ojo de Hacienda Delores          | Mexico                         | 1  |
| North American outgroup generalist | <i>Cyprinodon radiosus</i>      | Owens Valley                     | CA, USA                        | 1  |
| Caribbean outgroup generalist      | <i>Cyprinodon veronicae</i>     | Ojo de Agua Charco Azul          | Mexico                         | 1  |
| North American outgroup generalist | <i>Cyprinodon variegatus</i>    | Salt pond near Dean's blue hole  | Long Island, Bahamas           | 1  |
| Caribbean outgroup generalist      | <i>Cyprinodon variegatus</i>    | Unnamed lake 'near Rokers Point' | Exumas, Bahamas                | 2  |
| Caribbean outgroup generalist      | <i>Cyprinodon variegatus</i>    | Unnamed lake 'Ephemeral'         | Exumas, Bahamas                | 1  |
| Caribbean outgroup generalist      | <i>Cyprinodon bondi</i>         | Etang Saumautre                  | Dominican Republic             | 1  |
| Caribbean outgroup generalist      | <i>Cyprinodon variegatus</i>    | Unnamed lake                     | Mayaguana                      | 1  |
| Caribbean outgroup generalist      | <i>Cyprinodon variegatus</i>    | Sarasota estuary                 | Florida, United States         | 1  |

|                                            |                              |                         |                                |   |
|--------------------------------------------|------------------------------|-------------------------|--------------------------------|---|
| Caribbean outgroup generalist              | <i>Cyprinodon variegatus</i> | Lake Kilarney           | New Providence Island, Bahamas | 1 |
| Caribbean outgroup generalist              | <i>Cyprinodon variegatus</i> | Great Lake in the south | Long Island, Bahamas           | 1 |
| Caribbean outgroup generalist              | <i>Cyprinodon ovinus</i>     | Falmouth River          | Massachusetts, USA             | 1 |
| Caribbean outgroup generalist              | <i>Cyprinodon variegatus</i> | New Bight               | Cat Island, Bahamas            |   |
| Caribbean outgroup generalist              | <i>Cyprinodon variegatus</i> | Pirate's Well Lake      | Mayaguana, Bahamas             | 1 |
| Caribbean outgroup generalist              | <i>Cyprinodon variegatus</i> | Salt Pond               | Exumas, Bahamas                | 1 |
| Caribbean outgroup generalist              | <i>Cyprinodon variegatus</i> | Scully Lake             | Mayaguana, Bahamas             | 1 |
| Lake Chichancab pupfish radiation outgroup | <i>Cyprinodon maya</i>       | Laguna Chichancanab     | Quintana Roo, Mexico           | 1 |
| Lake Chichancab pupfish radiation outgroup | <i>Cyprinodon simus</i>      | Laguna Chichancanab     | Quintana Roo, Mexico           | 1 |
| <i>Cualac</i> outgroup                     | <i>Cualac tessellatus</i>    | Media Luna              | Mexico                         | 1 |
| <i>Megupsilon</i> outgroup                 | <i>Megupsilon aporus</i>     | El Potosi               | Mexico                         | 1 |

1224  
1225



1226  
1227  
1228  
1229  
1230  
1231  
1232

**Table S2.**

**Candidate adaptive regions for the San Salvador Island scale-eater.** Location of the genic regions that contained signatures of a strong selective sweep in the scale-eater (SweeD CLR  $\geq 5.28$ ) and at least one divergent variant between the specialists ( $F_{st} \geq 0.95$ ). Full list of variants, including unannotated candidate regions provided in Data S2. Regions highlighted in Figure 4 are listed in bold.

| Gene               | Scaffold                 | Gene Start     | Gene End       | Number of Variants |
|--------------------|--------------------------|----------------|----------------|--------------------|
| <i>coq7</i>        | c_bro_v1_0_scaf1         | 28974409       | 28979038       | 3                  |
| <i>gpr83</i>       | c_bro_v1_0_scaf1         | 38351481       | 38355816       | 2                  |
| <i>klf1</i>        | c_bro_v1_0_scaf1         | 29239984       | 29242454       | 13                 |
| <i>notum2</i>      | c_bro_v1_0_scaf1         | 28950946       | 28957848       | 1                  |
| <i>rbm20</i>       | c_bro_v1_0_scaf1         | 15024176       | 15044016       | 1                  |
| <i>rps15a</i>      | c_bro_v1_0_scaf1         | 28942599       | 28947456       | 2                  |
| <i>ube2k</i>       | c_bro_v1_0_scaf1         | 41168936       | 41171561       | 2                  |
| <i>atp8a2</i>      | c_bro_v1_0_scaf11        | 13000335       | 13035561       | 92                 |
| <i>cd226</i>       | c_bro_v1_0_scaf11        | 10936603       | 10941232       | 7                  |
| <i>cdk8</i>        | c_bro_v1_0_scaf11        | 13057400       | 13067971       | 1                  |
| <i>cmb1</i>        | c_bro_v1_0_scaf11        | 9934853        | 9938096        | 11                 |
| <i>crispld1</i>    | c_bro_v1_0_scaf11        | 11066268       | 11081938       | 7                  |
| <i>dok6</i>        | c_bro_v1_0_scaf11        | 10963193       | 10972277       | 50                 |
| <i>fbxl7</i>       | c_bro_v1_0_scaf11        | 21351783       | 21356510       | 6                  |
| <i>hnf4g</i>       | c_bro_v1_0_scaf11        | 8350195        | 8354295        | 1                  |
| <i>med1</i>        | c_bro_v1_0_scaf11        | 21393330       | 21400087       | 26                 |
| <i>mtrr</i>        | c_bro_v1_0_scaf11        | 9943625        | 9954042        | 2                  |
| <i>ncoa2</i>       | c_bro_v1_0_scaf11        | 11949666       | 11977882       | 4                  |
| <b><i>prlh</i></b> | <b>c_bro_v1_0_scaf11</b> | <b>9494231</b> | <b>9495565</b> | <b>18</b>          |
| <i>rmf6</i>        | c_bro_v1_0_scaf11        | 13047328       | 13052736       | 4                  |
| <i>shisa2</i>      | c_bro_v1_0_scaf11        | 12945178       | 12953040       | 38                 |
| <i>slc51a</i>      | c_bro_v1_0_scaf11        | 9862250        | 9873650        | 29                 |
| <i>spice1</i>      | c_bro_v1_0_scaf11        | 12934206       | 12942196       | 2                  |
| <i>zfhx4</i>       | c_bro_v1_0_scaf11        | 8078834        | 8095610        | 1                  |
| <i>zbed1</i>       | c_bro_v1_0_scaf14        | 23383635       | 23383982       | 9                  |
| <i>abhd8</i>       | c_bro_v1_0_scaf16        | 13452740       | 13457468       | 24                 |
| <i>b3gnt3</i>      | c_bro_v1_0_scaf16        | 10003286       | 10004410       | 15                 |
| <i>bmb</i>         | c_bro_v1_0_scaf16        | 10649637       | 10654441       | 38                 |
| <i>brinp3</i>      | c_bro_v1_0_scaf16        | 11738302       | 11756508       | 33                 |
| <i>crocc</i>       | c_bro_v1_0_scaf16        | 32985892       | 33009791       | 1                  |
| <i>dda1</i>        | c_bro_v1_0_scaf16        | 13466708       | 13470377       | 2                  |
| <i>eef1d</i>       | c_bro_v1_0_scaf16        | 10028318       | 10042958       | 30                 |
| <i>ptprs</i>       | c_bro_v1_0_scaf16        | 8205473        | 8246024        | 56                 |

|                  |                          |                |                |          |
|------------------|--------------------------|----------------|----------------|----------|
| <i>pycr3</i>     | c_bro_v1_0_scaf16        | 10045452       | 10047013       | 8        |
| <i>rfc4</i>      | c_bro_v1_0_scaf16        | 35817866       | 35832867       | 38       |
| <i>serpinb1</i>  | c_bro_v1_0_scaf16        | 10634868       | 10638000       | 14       |
| <i>tdrd5</i>     | c_bro_v1_0_scaf16        | 12808042       | 12822317       | 47       |
| <i>tjp3</i>      | c_bro_v1_0_scaf16        | 35777675       | 35795399       | 21       |
| <i>tsta3</i>     | c_bro_v1_0_scaf16        | 10641946       | 10647463       | 23       |
| <i>zfp2</i>      | c_bro_v1_0_scaf16        | 35859060       | 35860865       | 8        |
| <i>zfp26</i>     | c_bro_v1_0_scaf16        | 35907423       | 35909825       | 2        |
| <i>znf271</i>    | c_bro_v1_0_scaf16        | 35840463       | 35842592       | 7        |
| <i>znf45</i>     | c_bro_v1_0_scaf16        | 35879283       | 35880581       | 7        |
| <i>anks1a</i>    | c_bro_v1_0_scaf18        | 18164811       | 18167681       | 1        |
| <i>gnat2</i>     | c_bro_v1_0_scaf18        | 13731762       | 13735798       | 2        |
| <i>itga5</i>     | c_bro_v1_0_scaf18        | 28908235       | 28944244       | 2        |
| <i>mybph</i>     | c_bro_v1_0_scaf18        | 26461834       | 26474649       | 15       |
| <i>nfasc</i>     | c_bro_v1_0_scaf18        | 17031686       | 17047770       | 1        |
| <i>sarg</i>      | c_bro_v1_0_scaf18        | 18185730       | 18187828       | 2        |
| <i>slc16a1</i>   | c_bro_v1_0_scaf18        | 29586755       | 29599009       | 1        |
| <i>nap114</i>    | c_bro_v1_0_scaf19        | 7836170        | 7842620        | 1        |
| <i>smap</i>      | c_bro_v1_0_scaf19        | 2027249        | 2028419        | 2        |
| <b><i>th</i></b> | <b>c_bro_v1_0_scaf19</b> | <b>7787018</b> | <b>7794685</b> | <b>1</b> |
| <i>trim44</i>    | c_bro_v1_0_scaf19        | 6431393        | 6435783        | 13       |
| <i>aasdhppt</i>  | c_bro_v1_0_scaf21        | 26911467       | 26919394       | 1        |
| <i>b3gat1</i>    | c_bro_v1_0_scaf21        | 29988110       | 29992848       | 1        |
| <i>cntn5</i>     | c_bro_v1_0_scaf21        | 10012673       | 10063457       | 1        |
| <i>col26a1</i>   | c_bro_v1_0_scaf21        | 20284619       | 20287102       | 12       |
| <i>emid1</i>     | c_bro_v1_0_scaf21        | 20254093       | 20266161       | 2        |
| <i>ifi44</i>     | c_bro_v1_0_scaf21        | 32843968       | 32848322       | 9        |
| <i>irf8</i>      | c_bro_v1_0_scaf21        | 41216201       | 41218789       | 1        |
| <i>mrm3</i>      | c_bro_v1_0_scaf21        | 15198156       | 15201994       | 1        |
| <i>nipsnap2</i>  | c_bro_v1_0_scaf21        | 24482700       | 24491999       | 33       |
| <i>nxn</i>       | c_bro_v1_0_scaf21        | 15204991       | 15221395       | 8        |
| <i>pde4d</i>     | c_bro_v1_0_scaf21        | 32298408       | 32320844       | 1        |
| <i>slc35e1</i>   | c_bro_v1_0_scaf21        | 31978195       | 31986378       | 1        |
| <i>tiparp</i>    | c_bro_v1_0_scaf21        | 33709833       | 33728566       | 1        |
| <i>trargl</i>    | c_bro_v1_0_scaf21        | 25190856       | 25191383       | 1        |
| <i>atad2</i>     | c_bro_v1_0_scaf22        | 7942666        | 7961336        | 3        |
| <i>cyp26b1</i>   | c_bro_v1_0_scaf24        | 20457960       | 20473004       | 8        |
| <i>dysf</i>      | c_bro_v1_0_scaf24        | 20196578       | 20211497       | 1        |
| <i>ext1</i>      | c_bro_v1_0_scaf26        | 271389         | 272345         | 8        |
| <i>ext1b</i>     | c_bro_v1_0_scaf26        | 241224         | 252635         | 1        |

|                           |                          |                 |                 |           |
|---------------------------|--------------------------|-----------------|-----------------|-----------|
| <i>ppp1r3a</i>            | c_bro_v1_0_scaf26        | 8473965         | 8479904         | 4         |
| <i>soga3</i>              | c_bro_v1_0_scaf26        | 428526          | 434421          | 23        |
| <i>washc5</i>             | c_bro_v1_0_scaf26        | 301047          | 314009          | 1         |
| <i>zdhhc14</i>            | c_bro_v1_0_scaf2748      | 17727           | 21969           | 1         |
| <i>bri3bp</i>             | c_bro_v1_0_scaf33        | 12638129        | 12642531        | 28        |
| <i>gnaq</i>               | c_bro_v1_0_scaf33        | 12884125        | 12889121        | 9         |
| <i>pip5k1b</i>            | c_bro_v1_0_scaf33        | 2845282         | 2870905         | 6         |
| <i>wdr31</i>              | c_bro_v1_0_scaf33        | 12650071        | 12652945        | 20        |
| <i>cadps</i>              | c_bro_v1_0_scaf34        | 25394387        | 25411387        | 3         |
| <i>eya2</i>               | c_bro_v1_0_scaf34        | 32387513        | 32410375        | 2         |
| <i>srgap3</i>             | c_bro_v1_0_scaf34        | 26044753        | 26082456        | 2         |
| <i>st7l</i>               | c_bro_v1_0_scaf34        | 31252675        | 31262720        | 1         |
| <b><i>tfap2a</i></b>      | <b>c_bro_v1_0_scaf34</b> | <b>32260190</b> | <b>32264933</b> | <b>6</b>  |
| <i>znf362</i>             | c_bro_v1_0_scaf34        | 27775403        | 27792854        | 1         |
| <i>arhgap29</i>           | c_bro_v1_0_scaf37        | 30354970        | 30373446        | 1         |
| <i>atp5if1a</i>           | c_bro_v1_0_scaf37        | 3215186         | 3217688         | 1         |
| <b><i>cfap20</i></b>      | <b>c_bro_v1_0_scaf37</b> | <b>5089635</b>  | <b>5093234</b>  | <b>24</b> |
| <i>chrna7</i>             | c_bro_v1_0_scaf37        | 3585852         | 3605137         | 8         |
| <i>dgat1</i>              | c_bro_v1_0_scaf37        | 5067735         | 5086382         | 37        |
| <i>dlx6a</i>              | c_bro_v1_0_scaf37        | 12742190        | 12744024        | 1         |
| <i>gpr20</i>              | c_bro_v1_0_scaf37        | 5101678         | 5107779         | 6         |
| <i>kcnn3</i>              | c_bro_v1_0_scaf37        | 3554189         | 3565883         | 4         |
| <i>mylipa</i>             | c_bro_v1_0_scaf37        | 8279827         | 8292615         | 1         |
| <i>slc45a4</i>            | c_bro_v1_0_scaf37        | 5115894         | 5125512         | 11        |
| <i>tbc1d20</i>            | c_bro_v1_0_scaf37        | 5047715         | 5065680         | 25        |
| <i>trim46</i>             | c_bro_v1_0_scaf37        | 3671825         | 3693120         | 1         |
| <i>trps1</i>              | c_bro_v1_0_scaf37        | 5649512         | 5665892         | 2         |
| <i>rmi1</i>               | c_bro_v1_0_scaf39        | 4258986         | 4266819         | 1         |
| <i>smyd1</i>              | c_bro_v1_0_scaf39        | 1675166         | 1684412         | 7         |
| <i>ubox5</i>              | c_bro_v1_0_scaf39        | 1621625         | 1630916         | 7         |
| <i>c1d</i>                | c_bro_v1_0_scaf43        | 30356623        | 30357420        | 6         |
| <i>dst</i>                | c_bro_v1_0_scaf43        | 16259900        | 16336750        | 2         |
| <i>ppp3r1</i>             | c_bro_v1_0_scaf43        | 30309740        | 30313100        | 4         |
| <i>sertad2</i>            | c_bro_v1_0_scaf43        | 10397273        | 10398532        | 4         |
| <i>spilc3</i>             | c_bro_v1_0_scaf43        | 12316311        | 12350292        | 3         |
| <i>tmem26</i>             | c_bro_v1_0_scaf43        | 26556107        | 26570766        | 5         |
| <i>znf451</i>             | c_bro_v1_0_scaf43        | 16192481        | 16198948        | 15        |
| <i>atp8a1</i>             | c_bro_v1_0_scaf44        | 14934291        | 14999736        | 19        |
| <b><i>cenpf,kcnk2</i></b> | <b>c_bro_v1_0_scaf44</b> | <b>12548021</b> | <b>12569724</b> | <b>16</b> |
| <i>gpm6a</i>              | c_bro_v1_0_scaf44        | 24566260        | 24570802        | 9         |

|                      |                          |                 |                 |           |
|----------------------|--------------------------|-----------------|-----------------|-----------|
| <b><i>kcnk2</i></b>  | <b>c_bro_v1_0_scaf44</b> | <b>12526223</b> | <b>12538276</b> | <b>23</b> |
| <i>tsc22d3</i>       | c_bro_v1_0_scaf44        | 11339700        | 11340952        | 3         |
| <i>tstd1</i>         | c_bro_v1_0_scaf44        | 12012710        | 12013203        | 1         |
| <b><i>card8</i></b>  | <b>c_bro_v1_0_scaf46</b> | <b>1328324</b>  | <b>1329460</b>  | <b>10</b> |
| <i>ccdc178</i>       | c_bro_v1_0_scaf46        | 15536795        | 15561009        | 1         |
| <i>xrn1</i>          | c_bro_v1_0_scaf46        | 25988805        | 26007498        | 39        |
| <i>dnm1</i>          | c_bro_v1_0_scaf47        | 21986865        | 22007761        | 1         |
| <i>map1b</i>         | c_bro_v1_0_scaf47        | 16222149        | 16245672        | 9         |
| <i>pdlim5</i>        | c_bro_v1_0_scaf47        | 24141068        | 24152322        | 1         |
| <i>ptger4</i>        | c_bro_v1_0_scaf47        | 16158956        | 16164333        | 4         |
| <i>aldh1a2</i>       | c_bro_v1_0_scaf5         | 27683247        | 27700000        | 1         |
| <i>esrp2</i>         | c_bro_v1_0_scaf5         | 34229725        | 34252121        | 1         |
| <i>gse1</i>          | c_bro_v1_0_scaf5         | 28378694        | 28397287        | 1         |
| <b><i>tcfl2</i></b>  | <b>c_bro_v1_0_scaf5</b>  | <b>27885956</b> | <b>27895543</b> | <b>15</b> |
| <i>bcor</i>          | c_bro_v1_0_scaf52        | 5564938         | 5578475         | 2         |
| <i>chpf</i>          | c_bro_v1_0_scaf52        | 21895691        | 21907353        | 1         |
| <i>nr4a2</i>         | c_bro_v1_0_scaf52        | 13846770        | 13849514        | 4         |
| <i>st6gal2</i>       | c_bro_v1_0_scaf52        | 6730438         | 6731400         | 2         |
| <i>vgl13</i>         | c_bro_v1_0_scaf52        | 23953279        | 23956671        | 1         |
| <i>cox6b1</i>        | c_bro_v1_0_scaf53        | 24790612        | 24793003        | 8         |
| <i>cyp21a2</i>       | c_bro_v1_0_scaf53        | 18529622        | 18536111        | 2         |
| <i>eva1b</i>         | c_bro_v1_0_scaf53        | 29794772        | 29795353        | 2         |
| <i>fhod3</i>         | c_bro_v1_0_scaf53        | 18622119        | 18644926        | 2         |
| <i>galnt1</i>        | c_bro_v1_0_scaf53        | 20852048        | 20872629        | 17        |
| <i>glipr2</i>        | c_bro_v1_0_scaf53        | 20433230        | 20435503        | 3         |
| <i>hdac9b</i>        | c_bro_v1_0_scaf53        | 19008287        | 19034268        | 1         |
| <i>mag</i>           | c_bro_v1_0_scaf53        | 17408478        | 17413240        | 2         |
| <i>map7d1</i>        | c_bro_v1_0_scaf53        | 29904810        | 29922183        | 25        |
| <i>mindy3</i>        | c_bro_v1_0_scaf53        | 20097197        | 20106215        | 8         |
| <i>nacad</i>         | c_bro_v1_0_scaf53        | 20437309        | 20451974        | 2         |
| <i>pxn1</i>          | c_bro_v1_0_scaf53        | 20366555        | 20367417        | 1         |
| <i>rasip1</i>        | c_bro_v1_0_scaf53        | 24769523        | 24786366        | 13        |
| <i>slc2a3</i>        | c_bro_v1_0_scaf53        | 24809669        | 24817209        | 15        |
| <i>steap4</i>        | c_bro_v1_0_scaf53        | 20313856        | 20325260        | 26        |
| <i>tbrg4</i>         | c_bro_v1_0_scaf53        | 20454806        | 20462512        | 2         |
| <i>them4</i>         | c_bro_v1_0_scaf53        | 21823050        | 21830844        | 5         |
| <i>tnc</i>           | c_bro_v1_0_scaf53        | 18536783        | 18542213        | 1         |
| <b><i>twist1</i></b> | <b>c_bro_v1_0_scaf53</b> | <b>18968733</b> | <b>18969242</b> | <b>1</b>  |
| <i>zhx2</i>          | c_bro_v1_0_scaf53        | 11078442        | 11084544        | 6         |
| <i>znf628</i>        | c_bro_v1_0_scaf53        | 24721275        | 24732863        | 6         |

|                      |                          |                 |                 |          |
|----------------------|--------------------------|-----------------|-----------------|----------|
| <b><i>trim25</i></b> | <b>c_bro_v1_0_scaf60</b> | <b>1610217</b>  | <b>1614325</b>  | <b>2</b> |
| <i>znf214</i>        | c_bro_v1_0_scaf60        | 1787099         | 1793538         | 1        |
| <i>foxo3</i>         | c_bro_v1_0_scaf7         | 12823341        | 12824321        | 3        |
| <i>myct1</i>         | c_bro_v1_0_scaf7         | 13100090        | 13100656        | 1        |
| <i>otof</i>          | c_bro_v1_0_scaf7         | 12616933        | 12629352        | 3        |
| <i>otof</i>          | c_bro_v1_0_scaf7         | 12642391        | 12658039        | 5        |
| <i>smek1</i>         | c_bro_v1_0_scaf7         | 12319537        | 12332574        | 1        |
| <i>43530</i>         | c_bro_v1_0_scaf752       | 1258            | 12292           | 29       |
| <i>nat1</i>          | c_bro_v1_0_scaf752       | 13172           | 14020           | 7        |
| <i>zdhhc20</i>       | c_bro_v1_0_scaf752       | 16935           | 24566           | 7        |
| <b><i>galr2</i></b>  | <b>c_bro_v1_0_scaf8</b>  | <b>19974117</b> | <b>19979248</b> | <b>2</b> |
| <i>grid2ip</i>       | c_bro_v1_0_scaf8         | 21581872        | 21603752        | 4        |
| <i>map2k6</i>        | c_bro_v1_0_scaf8         | 19746299        | 19760895        | 3        |
| <i>dcun1d2</i>       | c_bro_v1_0_scaf9         | 28311034        | 28313774        | 7        |
| <i>fhl2</i>          | c_bro_v1_0_scaf9         | 25288775        | 25292382        | 1        |
| <i>fut9</i>          | c_bro_v1_0_scaf9         | 25262573        | 25263652        | 16       |

1233  
1234

1235  
1236  
1237  
1238  
1239  
1240  
1241  
1242

**Table S3. Candidate adaptive regions for the San Salvador Island molluscivore.** Location of the genic regions that contained signatures of a strong selective sweep in the molluscivore (SweeD CLR  $\geq 4.47$ ) and at least one divergent variant between the specialists ( $F_{st} \geq 0.95$ ). Full list of variants, including one unannotated candidate regions provided in Data S3. Regions highlighted in Figure S5 are listed in bold.

| Gene           | Scaffold                 | Gene Start      | Gene Stop       | Number of Variants |
|----------------|--------------------------|-----------------|-----------------|--------------------|
| alox15b        | c_bro_v1_0_scaf1         | 34682742        | 34695090        | 1                  |
| coq7           | c_bro_v1_0_scaf1         | 28974409        | 28979038        | 3                  |
| gga1           | c_bro_v1_0_scaf1         | 29195804        | 29209213        | 5                  |
| gpr83          | c_bro_v1_0_scaf1         | 38351481        | 38355816        | 2                  |
| klf1           | c_bro_v1_0_scaf1         | 29239984        | 29242454        | 13                 |
| notum2         | c_bro_v1_0_scaf1         | 28950946        | 28957848        | 1                  |
| rhm20          | c_bro_v1_0_scaf1         | 15024176        | 15044016        | 1                  |
| rps15a         | c_bro_v1_0_scaf1         | 28942599        | 28947456        | 2                  |
| atp8a2         | c_bro_v1_0_scaf11        | 13000335        | 13035561        | 92                 |
| cd226          | c_bro_v1_0_scaf11        | 10936603        | 10941232        | 6                  |
| ncoa2          | c_bro_v1_0_scaf11        | 11949666        | 11977882        | 7                  |
| shisa2         | c_bro_v1_0_scaf11        | 12945178        | 12953040        | 18                 |
| spice1         | c_bro_v1_0_scaf11        | 12934206        | 12942196        | 4                  |
| ube2w          | c_bro_v1_0_scaf11        | 11253461        | 11259709        | 48                 |
| abhd8          | c_bro_v1_0_scaf16        | 13452740        | 13457468        | 17                 |
| b3gnt3         | c_bro_v1_0_scaf16        | 10003286        | 10004410        | 15                 |
| b3gnt3         | c_bro_v1_0_scaf16        | 10019232        | 10020410        | 1                  |
| eef1d          | c_bro_v1_0_scaf16        | 10028318        | 10042958        | 64                 |
| ptprs          | c_bro_v1_0_scaf16        | 8205473         | 8246024         | 20                 |
| pycr3          | c_bro_v1_0_scaf16        | 10045452        | 10047013        | 8                  |
| rfc4           | c_bro_v1_0_scaf16        | 35817866        | 35832867        | 31                 |
| anks1a         | c_bro_v1_0_scaf18        | 18164811        | 18167681        | 1                  |
| mybph          | c_bro_v1_0_scaf18        | 26461834        | 26474649        | 7                  |
| nfasc          | c_bro_v1_0_scaf18        | 17031686        | 17047770        | 1                  |
| sarg           | c_bro_v1_0_scaf18        | 18185730        | 18187828        | 2                  |
| trim44         | c_bro_v1_0_scaf19        | 6431393         | 6435783         | 14                 |
| b3gat1         | c_bro_v1_0_scaf21        | 29988110        | 29992848        | 1                  |
| cntn5          | c_bro_v1_0_scaf21        | 10012673        | 10063457        | 1                  |
| <b>tiparp</b>  | <b>c_bro_v1_0_scaf21</b> | <b>33709833</b> | <b>33728566</b> | <b>1</b>           |
| trarg1         | c_bro_v1_0_scaf21        | 25190856        | 25191383        | 1                  |
| atad2          | c_bro_v1_0_scaf22        | 7942666         | 7961336         | 3                  |
| <b>cyp26b1</b> | <b>c_bro_v1_0_scaf24</b> | <b>20457960</b> | <b>20473004</b> | <b>8</b>           |

|         |                   |          |          |    |
|---------|-------------------|----------|----------|----|
| ext1    | c_bro_v1_0_scaf26 | 271389   | 272345   | 8  |
| ext1b   | c_bro_v1_0_scaf26 | 241224   | 252635   | 1  |
| sox9    | c_bro_v1_0_scaf27 | 22135691 | 22136918 | 2  |
| bri3bp  | c_bro_v1_0_scaf33 | 12638129 | 12642531 | 26 |
| gnaq    | c_bro_v1_0_scaf33 | 12884125 | 12889121 | 9  |
| wdr31   | c_bro_v1_0_scaf33 | 12650071 | 12652945 | 20 |
| cadps   | c_bro_v1_0_scaf34 | 25394387 | 25411387 | 2  |
| znf362  | c_bro_v1_0_scaf34 | 27775403 | 27792854 | 1  |
| dlx6a   | c_bro_v1_0_scaf37 | 12742190 | 12744024 | 1  |
| mylipa  | c_bro_v1_0_scaf37 | 8279827  | 8292615  | 1  |
| trps1   | c_bro_v1_0_scaf37 | 5649512  | 5665892  | 2  |
| vps9d1  | c_bro_v1_0_scaf4  | 15227575 | 15257418 | 1  |
| slc29a3 | c_bro_v1_0_scaf43 | 13679707 | 13685975 | 2  |
| ttc33   | c_bro_v1_0_scaf47 | 16128909 | 16148227 | 7  |
| esrp2   | c_bro_v1_0_scaf5  | 34229725 | 34252121 | 1  |
| fn1     | c_bro_v1_0_scaf52 | 19355212 | 19387175 | 1  |
| st6gal2 | c_bro_v1_0_scaf52 | 6730438  | 6731400  | 2  |
| vgl13   | c_bro_v1_0_scaf52 | 23953279 | 23956671 | 1  |
| cox6b1  | c_bro_v1_0_scaf53 | 24790612 | 24793003 | 8  |
| map7d1  | c_bro_v1_0_scaf53 | 29904810 | 29922183 | 25 |
| rasip1  | c_bro_v1_0_scaf53 | 24769523 | 24786366 | 13 |
| slc2a3  | c_bro_v1_0_scaf53 | 24809669 | 24817209 | 15 |
| zhx2    | c_bro_v1_0_scaf53 | 11078442 | 11084544 | 5  |
| znf628  | c_bro_v1_0_scaf53 | 24721275 | 24732863 | 5  |
| foxo3   | c_bro_v1_0_scaf7  | 12823341 | 12824321 | 3  |
| otof    | c_bro_v1_0_scaf7  | 12616933 | 12629352 | 11 |
| otof    | c_bro_v1_0_scaf7  | 12642391 | 12658039 | 5  |
| smek1   | HiC_scaffold_7    | 12319537 | 12332574 | 1  |

1243  
1244  
1245  
1246  
1247  
1248  
1249  
1250  
1251  
1252  
1253  
1254  
1255  
1256  
1257

**Table S4.**  
**Full list of functional terms associated with genes in candidate regions for the scale-eaters that were significantly enriched (FDR <0.05) in a GO analysis. Focal functional terms related**

1258 to key axes of diversification in this system: habitat preference (scale-eating/snail-eating niches),  
1259 trophic morphology, and/or pigmentation.



| Functional Category                               | Enrichment FDR | Genes in list | Total genes | Genes                                                                                                                                                                                                                                                                                                                      |
|---------------------------------------------------|----------------|---------------|-------------|----------------------------------------------------------------------------------------------------------------------------------------------------------------------------------------------------------------------------------------------------------------------------------------------------------------------------|
| Neuron differentiation                            | 0.00608452     | 25            | 1400        | <i>map1b,atp8a2,tcf12,gpm6a,nr4a2,brinp3,tnc,ptprs,mag,foxo3,med1,rnf6,aldh1a2,gnat2,pdlim5,trim46,nfasc,washc5,zhx2,th,ext1,galr2,anks1a,chrna7,dok6</i>                                                                                                                                                                  |
| Camera-type eye morphogenesis                     | 0.00608452     | 7             | 114         | <i>tbc1d20,atp8a2,gnat2,zhx2,th,tfap2a,twist1</i>                                                                                                                                                                                                                                                                          |
| Generation of neurons                             | 0.00608452     | 26            | 1553        | <i>map1b,atp8a2,tcf12,gpm6a,nr4a2,brinp3,tnc,ptprs,mag,foxo3,twist1,med1,rnf6,aldh1a2,gnat2,pdlim5,trim46,nfasc,washc5,zhx2,th,ext1,galr2,anks1a,chrna7,dok6</i>                                                                                                                                                           |
| Muscle tissue development                         | 0.00608452     | 12            | 400         | <i>cyp26b1,eya2,kcnk2,smyd1,fhl2,cenpf,twist1,med1,aldh1a2,fhod3,pdlim5,tiparp</i>                                                                                                                                                                                                                                         |
| Regulation of biological quality                  | 0.00608452     | 50            | 4146        | <i>kcnk2,klf1,dnm1,foxo3,atp8a1,abhd8,atp8a2,gnaq,ptger4,chrna7,gpr20,pde4d,xrn1,cyp26b1,cfap20,ube2k,rasip1,trim44,crocc,eya2,prlh,ptprs,mag,map2k6,otof,med1,rnf6,s teap4,aldh1a2,map1b,gnat2,fhod3,dysf,slc16a1,tsc22d3,pdlim5,cadps,tiparp,nxn,rmi1,th,galr2,dgat1,grid2ip,tbc1d20,tbrg4,them4,trim46,rfc4,cyp21a2</i> |
| Cell development                                  | 0.00708671     | 32            | 2196        | <i>map1b,atp8a2,tcf12,gpm6a,brinp3,tnc,ptprs,mag,fhl2,foxo3,twist1,med1,tbc1d20,rnf6,aldh1a2,gnat2,fhod3,dysf,nr4a2,tdrd5,pdlim5,trim46,nfasc,washc5,zhx2,th,ext1,galr2,anks1a,pde4d,chrna7,dok6</i>                                                                                                                       |
| Neural retina development                         | 0.00819009     | 5             | 64          | <i>atp8a2,gnat2,gpm6a,zhx2,tfap2a</i>                                                                                                                                                                                                                                                                                      |
| Feeding behavior                                  | 0.00819009     | 6             | 102         | <i>cfap20,prlh,atp8a2,rmi1,th,galr2</i>                                                                                                                                                                                                                                                                                    |
| Striated muscle tissue development                | 0.00819009     | 11            | 385         | <i>cyp26b1,eya2,kcnk2,smyd1,fhl2,cenpf,twist1,med1,aldh1a2,fhod3,pdlim5</i>                                                                                                                                                                                                                                                |
| Neurogenesis                                      | 0.00819009     | 26            | 1663        | <i>map1b,atp8a2,tcf12,gpm6a,nr4a2,brinp3,tnc,ptprs,mag,foxo3,twist1,med1,rnf6,aldh1a2,gnat2,pdlim5,trim46,nfasc,washc5,zhx2,th,ext1,galr2,anks1a,chrna7,dok6</i>                                                                                                                                                           |
| Response to lipid                                 | 0.00819009     | 19            | 997         | <i>rnf6,brinp3,ptger4,card8,med1,cyp26b1,tnc,pde4d,xrn1,foxo3,trim25,gpr83,aldh1a2,ncoa2,irf8,nr4a2,hnf4g,th,fhl2</i>                                                                                                                                                                                                      |
| Eating behavior                                   | 0.00819009     | 4             | 33          | <i>prlh,atp8a2,rmi1,th</i>                                                                                                                                                                                                                                                                                                 |
| Camera-type eye development                       | 0.00819009     | 10            | 317         | <i>med1,tbc1d20,aldh1a2,atp8a2,gnat2,gpm6a,zhx2,th,tfap2a,twist1</i>                                                                                                                                                                                                                                                       |
| Developmental growth                              | 0.00819009     | 15            | 651         | <i>tnc,prlh,kcnk2,ptprs,mag,pde4d,foxo3,med1,rnf6,map1b,atp8a2,dysf,pdlim5,rmi1,trim46</i>                                                                                                                                                                                                                                 |
| Eye morphogenesis                                 | 0.0084973      | 7             | 152         | <i>tbc1d20,atp8a2,gnat2,zhx2,th,tfap2a,twist1</i>                                                                                                                                                                                                                                                                          |
| Embryonic camera-type eye development             | 0.01187832     | 4             | 39          | <i>aldh1a2,th,twist1,tfap2a</i>                                                                                                                                                                                                                                                                                            |
| Regulation of phospholipid translocation          | 0.01187832     | 2             | 3           | <i>atp8a1,atp8a2</i>                                                                                                                                                                                                                                                                                                       |
| Positive regulation of phospholipid translocation | 0.01187832     | 2             | 3           | <i>atp8a1,atp8a2</i>                                                                                                                                                                                                                                                                                                       |
| Negative regulation of axon extension             | 0.01370935     | 4             | 41          | <i>ptprs,mag,rnf6,trim46</i>                                                                                                                                                                                                                                                                                               |

|                                                        |            |    |      |                                                                                                                                                                                                                                                                                                        |
|--------------------------------------------------------|------------|----|------|--------------------------------------------------------------------------------------------------------------------------------------------------------------------------------------------------------------------------------------------------------------------------------------------------------|
| Eye development                                        | 0.01408643 | 10 | 365  | <i>med1,tbc1d20,aldh1a2,atp8a2,gnat2,gpm6a,zhx2,th,tfap2a,twist1</i>                                                                                                                                                                                                                                   |
| Growth                                                 | 0.01408643 | 18 | 1018 | <i>sertad2,st7l,tnc,prlh,kcnk2,ptprs,mag,pde4d,foxo3,med1,rnf6,map1b,atp8a2,dysf,irf8,pdlim5,rmi1,trim46</i>                                                                                                                                                                                           |
| Cellular response to lipid                             | 0.01408643 | 14 | 671  | <i>rnf6,brinp3,ptger4,card8,med1,cyp26b1,tnc,pde4d,foxo3,aldh1a2,irf8,nr4a2,hnf4g,fhl2</i>                                                                                                                                                                                                             |
| Visual system development                              | 0.01408643 | 10 | 366  | <i>med1,tbc1d20,aldh1a2,atp8a2,gnat2,gpm6a,zhx2,th,tfap2a,twist1</i>                                                                                                                                                                                                                                   |
| Anatomical structure morphogenesis                     | 0.01669332 | 34 | 2702 | <i>map1b,tfap2a,cyp26b1,tnc,esrp2,ptprs,rasip1,mag,fhl2,foxo3,twist1,med1,tbc1d20,rnf6,aldh1a2,atp8a2,gnat2,fhod3,dysf,gpm6a,nr4a2,itga5,pdlim5,trim46,nfasc,tiparp,zhx2,th,ext1,crispld1,chrna7,bcor,eya2,dok6</i>                                                                                    |
| Neuron development                                     | 0.01669332 | 19 | 1140 | <i>map1b,atp8a2,gpm6a,tnc,ptprs,mag,rnf6,gnat2,nr4a2,pdlim5,trim46,nfasc,washc5,th,ext1,galr2,anks1a,chrna7,dok6</i>                                                                                                                                                                                   |
| Sensory system development                             | 0.01669332 | 10 | 377  | <i>med1,tbc1d20,aldh1a2,atp8a2,gnat2,gpm6a,zhx2,th,tfap2a,twist1</i>                                                                                                                                                                                                                                   |
| Cell differentiation                                   | 0.01725075 | 48 | 4372 | <i>tnc,klf1,map1b,atp8a2,tcf12,gpm6a,nr4a2,brinp3,smyd1,foxo3,glipr2,med1,tfap2a,cyp26b1,prlh,ptprs,rasip1,mag,fhl2,cenpf,twist1,tbc1d20,rnf6,steap4,aldh1a2,gnat2,fhod3,dysf,irf8,tdrd5,pdlim5,trim46,nfasc,tiparp,washc5,nxn,ptger4,zhx2,th,ext1,galr2,itga5,anks1a,trps1,pde4d,chrna7,eya2,dok6</i> |
| Behavior                                               | 0.01791936 | 13 | 619  | <i>cfap20,prlh,kcnk2,atp8a1,atp8a2,ncoa2,nr4a2,slc16a1,itga5,rmi1,th,chrna7,galr2</i>                                                                                                                                                                                                                  |
| Intracellular receptor signaling pathway               | 0.02008492 | 9  | 323  | <i>rnf6,med1,cyp26b1,twist1,aldh1a2,nr4a2,hnf4g,fhl2,map2k6</i>                                                                                                                                                                                                                                        |
| Reduction of food intake in response to dietary excess | 0.02011061 | 2  | 5    | <i>prlh,rmi1</i>                                                                                                                                                                                                                                                                                       |
| Nervous system development                             | 0.02011061 | 31 | 2439 | <i>cox6b1,map1b,atp8a2,tcf12,gpm6a,nr4a2,brinp3,tnc,prlh,ptprs,mag,foxo3,twist1,med1,rnf6,aldh1a2,gnat2,pdlim5,trim46,nfasc,washc5,fut9,zhx2,th,ext1,galr2,cenpf,anks1a,tfap2a,chrna7,dok6</i>                                                                                                         |
| Sensory organ development                              | 0.02011061 | 12 | 561  | <i>cyp26b1,kcnk2,med1,tbc1d20,aldh1a2,atp8a2,gnat2,gpm6a,zhx2,th,tfap2a,twist1</i>                                                                                                                                                                                                                     |
| Regulation of axon extension                           | 0.02011061 | 5  | 94   | <i>ptprs,mag,rnf6,map1b,trim46</i>                                                                                                                                                                                                                                                                     |
| Response to vitamin                                    | 0.02011061 | 5  | 92   | <i>cyp26b1,tnc,trim25,med1,aldh1a2</i>                                                                                                                                                                                                                                                                 |
| Cellular hormone metabolic process                     | 0.02011061 | 6  | 142  | <i>cyp26b1,aldh1a2,tiparp,dgat1,med1,cyp21a2</i>                                                                                                                                                                                                                                                       |
| Negative regulation of growth                          | 0.02011061 | 8  | 267  | <i>sertad2,st7l,kcnk2,ptprs,mag,rnf6,irf8,trim46</i>                                                                                                                                                                                                                                                   |
| Retina morphogenesis in camera-type eye                | 0.02011061 | 4  | 53   | <i>atp8a2,gnat2,zhx2,tfap2a</i>                                                                                                                                                                                                                                                                        |
| Sensory organ morphogenesis                            | 0.02011061 | 8  | 267  | <i>cyp26b1,tbc1d20,atp8a2,gnat2,zhx2,th,tfap2a,twist1</i>                                                                                                                                                                                                                                              |
| Negative regulation of                                 | 0.02019114 | 6  | 147  | <i>atad2,xrn1,twist1,znf451,bcor,cenpf</i>                                                                                                                                                                                                                                                             |

|                                                       |            |    |      |                                                                                                                                                                                                                                                                                                        |
|-------------------------------------------------------|------------|----|------|--------------------------------------------------------------------------------------------------------------------------------------------------------------------------------------------------------------------------------------------------------------------------------------------------------|
| chromosome organization                               |            |    |      |                                                                                                                                                                                                                                                                                                        |
| Regulation of neuron differentiation                  | 0.02113374 | 13 | 656  | <i>tcf12,brinp3,ptprs,mag,foxo3,med1,rnf6,map1b,atp8a2,pdlim5,washc5,zhx2,trim46</i>                                                                                                                                                                                                                   |
| Retina development in camera-type eye                 | 0.02113374 | 6  | 149  | <i>med1,atp8a2,gnat2,gpm6a,zhx2,tfap2a</i>                                                                                                                                                                                                                                                             |
| Neuron projection morphogenesis                       | 0.02244972 | 13 | 662  | <i>map1b,ptprs,mag,rnf6,atp8a2,gpm6a,nr4a2,pdlim5,trim46,nfasc,ext1,chrna7,dok6</i>                                                                                                                                                                                                                    |
| Response to hormone                                   | 0.02411051 | 17 | 1031 | <i>foxo3,med1,rnf6,ncoa2,nr4a2,ptger4,chrna7,tnc,prlh,xrn1,gpr83,aldh1a2,hnf4g,th,trarg1,fhl2,gnaq</i>                                                                                                                                                                                                 |
| Negative regulation of developmental growth           | 0.02447961 | 5  | 105  | <i>kcnk2,ptprs,mag,rnf6,trim46</i>                                                                                                                                                                                                                                                                     |
| Cell morphogenesis involved in neuron differentiation | 0.02447961 | 12 | 591  | <i>map1b,ptprs,mag,rnf6,atp8a2,nr4a2,pdlim5,trim46,nfasc,ext1,chrna7,dok6</i>                                                                                                                                                                                                                          |
| Cell projection morphogenesis                         | 0.02447961 | 13 | 678  | <i>map1b,ptprs,mag,rnf6,atp8a2,gpm6a,nr4a2,pdlim5,trim46,nfasc,ext1,chrna7,dok6</i>                                                                                                                                                                                                                    |
| Axon development                                      | 0.02447961 | 11 | 510  | <i>map1b,tnc,ptprs,mag,rnf6,atp8a2,nr4a2,trim46,nfasc,ext1,dok6</i>                                                                                                                                                                                                                                    |
| Plasma membrane bounded cell projection morphogenesis | 0.02447961 | 13 | 676  | <i>map1b,ptprs,mag,rnf6,atp8a2,gpm6a,nr4a2,pdlim5,trim46,nfasc,ext1,chrna7,dok6</i>                                                                                                                                                                                                                    |
| Response to organic cyclic compound                   | 0.02545138 | 16 | 962  | <i>rnf6,med1,tiparp,tnc,pde4d,xrn1,foxo3,trim25,gpr83,aldh1a2,ncoa2,nr4a2,slc16a1,hnf4g,th,fhl2</i>                                                                                                                                                                                                    |
| Negative regulation of neuron differentiation         | 0.02545138 | 7  | 224  | <i>ptprs,mag,foxo3,med1,rnf6,zhx2,trim46</i>                                                                                                                                                                                                                                                           |
| Embryonic camera-type eye morphogenesis               | 0.02545138 | 3  | 28   | <i>th,twist1,tfap2a</i>                                                                                                                                                                                                                                                                                |
| Regulation of extent of cell growth                   | 0.02545138 | 5  | 109  | <i>ptprs,mag,rnf6,map1b,trim46</i>                                                                                                                                                                                                                                                                     |
| Protein K48-linked ubiquitination                     | 0.02545138 | 4  | 62   | <i>ube2k,march6,trim44,rnf6</i>                                                                                                                                                                                                                                                                        |
| Negative regulation of chromatin organization         | 0.02545138 | 4  | 63   | <i>atad2,twist1,znf451,bcor</i>                                                                                                                                                                                                                                                                        |
| Cellular developmental process                        | 0.02579863 | 48 | 4587 | <i>tnc,klf1,map1b,atp8a2,tcf12,gpm6a,nr4a2,brinp3,smyd1,foxo3,glipr2,med1,tfap2a,cyp26b1,prlh,ptprs,rasip1,mag,fhl2,cenpf,twist1,tbc1d20,rnf6,steap4,aldh1a2,gnat2,fhod3,dysf,irf8,tdrd5,pdlim5,trim46,nfasc,tiparp,washc5,nxn,ptger4,zhx2,th,ext1,galr2,itga5,anks1a,trps1,pde4d,chrna7,eya2,dok6</i> |

|                                                   |            |    |      |                                                                                                                                                                                                                                             |
|---------------------------------------------------|------------|----|------|---------------------------------------------------------------------------------------------------------------------------------------------------------------------------------------------------------------------------------------------|
| Circulatory system development                    | 0.02618802 | 17 | 1064 | <i>th,kcnk2,rasip1,smyd1,fhl2,twist1,med1,aldh1a2,fhod3,dysf,itga5,pdlim5,tiparp,nxn,rbm20,chrna7,bcor</i>                                                                                                                                  |
| Cell part morphogenesis                           | 0.0264455  | 13 | 697  | <i>map1b,ptprs,mag,rnf6,atp8a2,gpm6a,nr4a2,pdlim5,trim46,nfasc,ext1,chrna7,dok6</i>                                                                                                                                                         |
| Anatomical structure maturation                   | 0.0264455  | 6  | 167  | <i>foxo3,aldh1a2,nr4a2,nfasc,washc5,anks1a</i>                                                                                                                                                                                              |
| Response to extracellular stimulus                | 0.02777357 | 11 | 532  | <i>nr4a2,cyp26b1,tnc,prlh,foxo3,trim25,med1,aldh1a2,slc16a1,rmi1,th</i>                                                                                                                                                                     |
| Response to oxygen-containing compound            | 0.0281392  | 23 | 1689 | <i>foxo3,nr4a2,brinp3,ptger4,th,card8,chrna7,cyp26b1,tnc,prlh,klf1,dnm1,map2k6,pde4d,xrn1,trim25,med1,aldh1a2,ncoa2,irf8,rmi1,trarg1,gnaq</i>                                                                                               |
| Cellular response to oxygen-containing compound   | 0.02824704 | 18 | 1178 | <i>foxo3,nr4a2,brinp3,ptger4,card8,cyp26b1,tnc,klf1,map2k6,pde4d,xrn1,med1,aldh1a2,irf8,th,trarg1,gnaq,chrna7</i>                                                                                                                           |
| Response to axon injury                           | 0.02862969 | 4  | 69   | <i>tnc,kcnk2,ptprs,mag</i>                                                                                                                                                                                                                  |
| Negative regulation of axonogenesis               | 0.02862969 | 4  | 69   | <i>ptprs,mag,rnf6,trim46</i>                                                                                                                                                                                                                |
| Developmental growth involved in morphogenesis    | 0.02862969 | 7  | 237  | <i>tnc,ptprs,mag,med1,rnf6,map1b,trim46</i>                                                                                                                                                                                                 |
| Negative regulation of protein polyubiquitination | 0.02862969 | 2  | 8    | <i>trim44,dysf</i>                                                                                                                                                                                                                          |
| Regulation of phospholipid transport              | 0.02862969 | 2  | 8    | <i>atp8a1,atp8a2</i>                                                                                                                                                                                                                        |
| Positive regulation of phospholipid transport     | 0.02862969 | 2  | 8    | <i>atp8a1,atp8a2</i>                                                                                                                                                                                                                        |
| Neuron projection development                     | 0.02913429 | 16 | 997  | <i>map1b,gpm6a,tnc,ptprs,mag,rnf6,atp8a2,nr4a2,pdlim5,trim46,nfasc,washc5,ext1,galr2,chrna7,dok6</i>                                                                                                                                        |
| Cell maturation                                   | 0.03039891 | 6  | 178  | <i>foxo3,nr4a2,tdrd5,nfasc,washc5,anks1a</i>                                                                                                                                                                                                |
| Axon extension                                    | 0.03039891 | 5  | 120  | <i>ptprs,mag,rnf6,map1b,trim46</i>                                                                                                                                                                                                          |
| Heart development                                 | 0.03089855 | 11 | 552  | <i>th,kcnk2,smyd1,fhl2,twist1,med1,aldh1a2,fhod3,pdlim5,rbm20,bcor</i>                                                                                                                                                                      |
| Cellular response to chemical stimulus            | 0.03089855 | 38 | 3443 | <i>foxo3,med1,rnf6,ncoa2,nr4a2,brinp3,ptger4,shisa2,cyp26b1,card8,tfap2a,irf8,tiparp,trim44,tnc,kcnk2,klf1,map2k6,pde4d,xrn1,trim25,twist1,aldh1a2,dysf,slc16a1,hnf4g,nxn,th,trarg1,ube2k,znf451,gnaq,chrna7,fhl2,esrp2,itga5,cmb1,nat1</i> |
| Axonogenesis                                      | 0.0310125  | 10 | 471  | <i>map1b,ptprs,mag,rnf6,atp8a2,nr4a2,trim46,nfasc,ext1,dok6</i>                                                                                                                                                                             |
| Embryonic forelimb morphogenesis                  | 0.03241747 | 3  | 34   | <i>twist1,aldh1a2,tfap2a</i>                                                                                                                                                                                                                |

|                                                        |            |    |      |                                                                                                                                                                                                                                                                                                                    |
|--------------------------------------------------------|------------|----|------|--------------------------------------------------------------------------------------------------------------------------------------------------------------------------------------------------------------------------------------------------------------------------------------------------------------------|
| Cellular response to retinoic acid                     | 0.03315736 | 4  | 74   | <i>brinp3,cyp26b1,tnc,aldh1a2</i>                                                                                                                                                                                                                                                                                  |
| Homeostatic process                                    | 0.03339051 | 25 | 1962 | <i>klf1,foxo3,abhd8,ptger4,gpr20,xrn1,ube2k,cyp26b1,crocc,prlh,map2k6,pde4d,med1,steap4,gnat2,slc16a1,tsc22d3,nxn,rmi1,th,galr2,dgat1,tbc1d20,chrna7,rfc4</i>                                                                                                                                                      |
| Negative regulation of cellular component organization | 0.03339051 | 13 | 739  | <i>atad2,xrn1,ptger4,ptprs,mag,twist1,rnf6,fhod3,dysf,znf451,bcor,trim46,cenpf</i>                                                                                                                                                                                                                                 |
| Response to vitamin D                                  | 0.03347122 | 3  | 35   | <i>tnc,trim25,med1</i>                                                                                                                                                                                                                                                                                             |
| Animal organ morphogenesis                             | 0.03351451 | 16 | 1027 | <i>tfap2a,cyp26b1,tnc,esrp2,fhl2,foxo3,twist1,med1,tbc1d20,aldh1a2,atp8a2,gnat2,tiparp,zhx2,th,bcor</i>                                                                                                                                                                                                            |
| System development                                     | 0.03351451 | 50 | 4976 | <i>cox6b1,klf1,map1b,atp8a2,tcf12,gpm6a,nr4a2,brinp3,th,foxo3,glipr2,tfap2a,cyp26b1,tnc,prlh,kcnk2,esrp2,ptprs,rasi p1,mag,smyd1,fhl2,cenpf,twist1,med1,tbc1d20,rnf6,aldh1a2,gnat2,fhod3,dysf,irf8,itga5,pdlim5,trim46,nfasc,tiparp,washc5,nxn,ptger4,fut9,zhx2,ext1,galr2,rbm20,chrna7,bcor,anks1a,trps1,dok6</i> |
| Embryonic eye morphogenesis                            | 0.03498708 | 3  | 36   | <i>th,twist1,tfap2a</i>                                                                                                                                                                                                                                                                                            |
| Cell morphogenesis involved in differentiation         | 0.03535026 | 13 | 751  | <i>map1b,ptprs,mag,tbc1d20,rnf6,atp8a2,nr4a2,pdlim5,trim46,nfasc,ext1,chrna7,dok6</i>                                                                                                                                                                                                                              |
| Negative regulation of cell growth                     | 0.03535026 | 6  | 191  | <i>sertad2,st7l,ptprs,mag,rnf6,trim46</i>                                                                                                                                                                                                                                                                          |
| Embryonic limb morphogenesis                           | 0.03535026 | 5  | 130  | <i>cyp26b1,twist1,med1,aldh1a2,tfap2a</i>                                                                                                                                                                                                                                                                          |
| Embryonic appendage morphogenesis                      | 0.03535026 | 5  | 130  | <i>cyp26b1,twist1,med1,aldh1a2,tfap2a</i>                                                                                                                                                                                                                                                                          |
| Protein localization to axon                           | 0.03535026 | 2  | 10   | <i>trim46,nfasc</i>                                                                                                                                                                                                                                                                                                |
| Regulation of developmental growth                     | 0.03607979 | 8  | 333  | <i>prlh,kcnk2,ptprs,mag,rnf6,map1b,atp8a2,trim46</i>                                                                                                                                                                                                                                                               |
| Cellular response to organic cyclic compound           | 0.03631117 | 11 | 579  | <i>rnf6,med1,tiparp,tnc,pde4d,xrn1,foxo3,nr4a2,slc16a1,hnf4g,fhl2</i>                                                                                                                                                                                                                                              |
| Response to nutrient levels                            | 0.03921368 | 10 | 500  | <i>cyp26b1,tnc,prlh,foxo3,trim25,med1,aldh1a2,slc16a1,rmi1,th</i>                                                                                                                                                                                                                                                  |
| Response to steroid hormone                            | 0.03921368 | 9  | 418  | <i>rnf6,med1,foxo3,gpr83,ncoa2,nr4a2,hnf4g,th,fhl2</i>                                                                                                                                                                                                                                                             |
| Regulation of tooth mineralization                     | 0.04037623 | 2  | 11   | <i>tfap2a,bcor</i>                                                                                                                                                                                                                                                                                                 |
| Oxidation-reduction process                            | 0.04038443 | 16 | 1061 | <i>cyp26b1,steap4,coq7,prlh,tsta3,pycr3,mtrr,cox6b1,aldh1a2,ppp1r3a,nxn,th,cyp21a2,twist1,tbrg4,tstd1</i>                                                                                                                                                                                                          |
| Response to endogenous stimulus                        | 0.04173373 | 22 | 1692 | <i>foxo3,med1,rnf6,ncoa2,nr4a2,ptger4,shisa2,chrna7,tnc,prlh,klf1,pde4d,xrn1,gpr83,aldh1a2,hnf4g,th,trarg1,znf451,fhl2,gnaq,esrp2</i>                                                                                                                                                                              |

|                                                           |            |    |      |                                                                                                                                                                                                                                         |
|-----------------------------------------------------------|------------|----|------|-----------------------------------------------------------------------------------------------------------------------------------------------------------------------------------------------------------------------------------------|
| Vitamin metabolic process                                 | 0.04365266 | 5  | 140  | <i>cyp26b1,mtrr,aldh1a2,slc2a3,aasdhppt</i>                                                                                                                                                                                             |
| Positive regulation of transcription, DNA-templated       | 0.04365266 | 21 | 1593 | <i>zfhx4,klf1,foxo3,tcf12,ncoa2,atad2,coq7,twist1,med1,tfap2a,irf8,hnf4g,trim44,galr2,zbed1,ppp3r1,rnf6,nr4a2,sertad2,fhl2,cdk8</i>                                                                                                     |
| Response to ketone                                        | 0.04397175 | 6  | 204  | <i>ptger4,tnc,xrn1,foxo3,ncoa2,th</i>                                                                                                                                                                                                   |
| Negative regulation of transcription by RNA polymerase II | 0.04451995 | 14 | 896  | <i>zfhx4,foxo3,coq7,zhx2,trps1,fhl2,tfap2a,irf8,twist1,med1,ncoa2,bcor,znf451,nr4a2</i>                                                                                                                                                 |
| Protein polyubiquitination                                | 0.04451995 | 7  | 277  | <i>ubox5,ube2k,rnf6,march6,trim44,dysf,fbxl7</i>                                                                                                                                                                                        |
| Response to external stimulus                             | 0.04451995 | 29 | 2525 | <i>card8,rps15a,nr4a2,trim44,ptger4,cyp26b1,tnc,prlh,kcnk2,ptprs,mag,pde4d,foxo3,trim25,med1,aldh1a2,atp8a2,gnat2,dysf,ifi44,irf8,gpm6a,slc16a1,nfasc,rmi1,th,ext1,gnaq,dok6</i>                                                        |
| Response to organic substance                             | 0.04451995 | 37 | 3461 | <i>foxo3,med1,rnf6,ncoa2,march6,nr4a2,brinp3,ptger4,th,shisa2,card8,aldh1a2,irf8,tiparp,trim44,chrna7,cyp26b1,tnc,prlh,klf1,dnm1,map2k6,pde4d,xrn1,trim25,twist1,gpr83,slc16a1,hnf4g,rmi1,trarg1,ube2k,znf451,fhl2,gnaq,esrp2,itga5</i> |
| Negative regulation of macromolecule metabolic process    | 0.04451995 | 32 | 2872 | <i>serpinb1,zfhx4,foxo3,atad2,coq7,zhx2,xrn1,trps1,card8,fhl2,cenpf,twist1,tfap2a,irf8,trim44,bcor,kcnk2,pde4d,smyd1,med1,dysf,ncoa2,nxn,c1d,chrna7,rasip1,znf451,tbrg4,nr4a2,gnaq,tiparp,rps15a</i>                                    |
| Positive regulation of gene expression                    | 0.04451995 | 25 | 2046 | <i>zfhx4,klf1,foxo3,tcf12,ncoa2,atad2,coq7,twist1,med1,tfap2a,irf8,hnf4g,trim44,galr2,zbed1,ppp3r1,cyp26b1,tnc,rnf6,aldh1a2,nr4a2,sertad2,rbm20,fhl2,cdk8</i>                                                                           |
| Negative regulation of gene expression                    | 0.04451995 | 24 | 1952 | <i>zfhx4,foxo3,atad2,coq7,zhx2,trps1,card8,fhl2,cenpf,twist1,tfap2a,irf8,bcor,xrn1,smyd1,med1,dysf,ncoa2,c1d,znf451,tbrg4,nr4a2,tiparp,rps15a</i>                                                                                       |
| Developmental maturation                                  | 0.04451995 | 7  | 282  | <i>foxo3,aldh1a2,nr4a2,tdrd5,nfasc,washc5,anks1a</i>                                                                                                                                                                                    |
| Negative regulation of histone modification               | 0.04451995 | 3  | 44   | <i>twist1,znf451,bcor</i>                                                                                                                                                                                                               |
| Protein modification by small protein conjugation         | 0.04451995 | 14 | 891  | <i>dcun1d2,ubox5,ube2k,znf451,rnf6,march6,trim44,bcor,trim25,med1,dysf,nxn,fbxl7,zbed1</i>                                                                                                                                              |
| Regulation of integrin activation                         | 0.04451995 | 2  | 13   | <i>ptger4,rasip1</i>                                                                                                                                                                                                                    |
| Forelimb morphogenesis                                    | 0.04451995 | 3  | 42   | <i>twist1,aldh1a2,tfap2a</i>                                                                                                                                                                                                            |
| Dopamine biosynthetic process                             | 0.04451995 | 2  | 12   | <i>th,nr4a2</i>                                                                                                                                                                                                                         |
| Negative regulation of transcription, DNA-templated       | 0.04451995 | 18 | 1298 | <i>zfhx4,foxo3,atad2,coq7,zhx2,trps1,fhl2,cenpf,twist1,tfap2a,irf8,bcor,smyd1,med1,ncoa2,c1d,znf451,nr4a2</i>                                                                                                                           |

|                                                                         |            |    |      |                                                                                                                                                                                                                                                                              |
|-------------------------------------------------------------------------|------------|----|------|------------------------------------------------------------------------------------------------------------------------------------------------------------------------------------------------------------------------------------------------------------------------------|
| Embryonic camera-type eye formation                                     | 0.04451995 | 2  | 12   | <i>twist1,tfap2a</i>                                                                                                                                                                                                                                                         |
| Eyelid development in camera-type eye                                   | 0.04451995 | 2  | 13   | <i>twist1,tfap2a</i>                                                                                                                                                                                                                                                         |
| Cellular response to organic substance                                  | 0.04451995 | 32 | 2872 | <i>foxo3,med1,rnf6,ncoa2,nr4a2,brinp3,ptger4,shisa2,card8,irf8,tiparp,trim44,cyp26b1,tnc,klf1,map2k6,pde4d,xrn1,trim25,twist1,aldh1a2,slc16a1,hnf4g,th,trarg1,ube2k,znf451,gnaq,chrna7,fhl2,esrp2,itga5</i>                                                                  |
| Cellular response to alcohol                                            | 0.04451995 | 4  | 90   | <i>ptger4,tnc,xrn1,foxo3</i>                                                                                                                                                                                                                                                 |
| Response to amyloid-beta                                                | 0.04451995 | 3  | 43   | <i>dnm1,foxo3,chrna7</i>                                                                                                                                                                                                                                                     |
| Negative regulation of cellular macromolecule biosynthetic process      | 0.04451995 | 20 | 1509 | <i>zfhx4,foxo3,atad2,coq7,zhx2,xrn1,trps1,fhl2,cenpf,twist1,tfap2a,irf8,bcor,kcnk2,smyd1,med1,ncoa2,c1d,znf451,nr4a2</i>                                                                                                                                                     |
| Cardiac muscle tissue development                                       | 0.04461977 | 6  | 213  | <i>kcnk2,fhl2,med1,aldh1a2,fhod3,pdlim5</i>                                                                                                                                                                                                                                  |
| Axon regeneration                                                       | 0.04525881 | 3  | 45   | <i>tnc,ptprs,mag</i>                                                                                                                                                                                                                                                         |
| Neuron maturation                                                       | 0.04525881 | 3  | 45   | <i>nr4a2,nfasc,anks1a</i>                                                                                                                                                                                                                                                    |
| Regulation of nucleobase-containing compound metabolic process          | 0.04595578 | 44 | 4374 | <i>eya2,zfhx4,klf1,foxo3,tfap2a,tcf12,ncoa2,atad2,coq7,zhx2,xrn1,esrp2,trps1,fhl2,cenpf,twist1,med1,irf8,rfc4,hnf4g,trim44,galr2,bcor,zbed1,ppp3r1,kcnk2,smyd1,znf45,rnf6,znf214,nr4a2,tsc22d3,znf362,sertad2,c1d,znf628,zfp2,rbm20,vgll3,card8,znf451,trim25,tbrg4,cdk8</i> |
| Tissue development                                                      | 0.04604795 | 25 | 2079 | <i>glipr2,tfap2a,cyp26b1,tnc,eya2,kcnk2,esrp2,ptprs,rasip1,smyd1,fhl2,cenpf,twist1,med1,tbc1d20,aldh1a2,fhod3,dysf,pdlim5,tiparp,ext1,itga5,bcor,trps1,pde4d</i>                                                                                                             |
| DNA-templated transcription, initiation                                 | 0.04769373 | 7  | 293  | <i>twist1,med1,znf451,znf45,cdk8,nr4a2,hnf4g</i>                                                                                                                                                                                                                             |
| Transcription initiation from RNA polymerase II promoter                | 0.04769373 | 6  | 221  | <i>med1,znf451,znf45,cdk8,nr4a2,hnf4g</i>                                                                                                                                                                                                                                    |
| Response to xenobiotic stimulus                                         | 0.04769373 | 7  | 292  | <i>cyp26b1,foxo3,nr4a2,tiparp,th,cmb1,nat1</i>                                                                                                                                                                                                                               |
| Appendage morphogenesis                                                 | 0.04769373 | 5  | 154  | <i>cyp26b1,twist1,med1,aldh1a2,tfap2a</i>                                                                                                                                                                                                                                    |
| Limb morphogenesis                                                      | 0.04769373 | 5  | 154  | <i>cyp26b1,twist1,med1,aldh1a2,tfap2a</i>                                                                                                                                                                                                                                    |
| Positive regulation of nucleobase-containing compound metabolic process | 0.04769373 | 24 | 1978 | <i>eya2,zfhx4,klf1,foxo3,tcf12,ncoa2,atad2,coq7,twist1,med1,tfap2a,irf8,rfc4,hnf4g,trim44,galr2,zbed1,ppp3r1,rnf6,nr4a2,sertad2,rbm20,fhl2,cdk8</i>                                                                                                                          |

|                                                            |            |    |      |                                                                                                                                                                                                                                                                                                     |
|------------------------------------------------------------|------------|----|------|-----------------------------------------------------------------------------------------------------------------------------------------------------------------------------------------------------------------------------------------------------------------------------------------------------|
| Negative regulation of neurogenesis                        | 0.04769373 | 7  | 292  | <i>ptprs,mag,foxo3,med1,rnf6,zhx2,trim46</i>                                                                                                                                                                                                                                                        |
| Negative regulation of nitrogen compound metabolic process | 0.04769373 | 29 | 2551 | <i>serpinb1,zfhx4,foxo3,atad2,coq7,zhx2,xrn1,trps1,card8,fhl2,cenpf,twist1,tfap2a,irf8,trim44,bcor,kcnk2,pde4d,smyd1,med1,dysf,ncoa2,nxn,c1d,chrna7,rasip1,znf451,nr4a2,gnaaq</i>                                                                                                                   |
| Roof of mouth development                                  | 0.04769373 | 4  | 94   | <i>twist1,tiparp,tfap2a,bcor</i>                                                                                                                                                                                                                                                                    |
| Cellular response to endogenous stimulus                   | 0.04769373 | 19 | 1431 | <i>foxo3,med1,rnf6,ncoa2,nr4a2,ptger4,shisa2,tnc,klf1,pde4d,xrn1,hnf4g,th,trarg1,znf451,gnaaq,chrna7,fhl2,esrp2</i>                                                                                                                                                                                 |
| Response to nutrient                                       | 0.04807838 | 6  | 222  | <i>cyp26b1,tnc,trim25,med1,aldh1a2,slc16a1</i>                                                                                                                                                                                                                                                      |
| Regulation of gene expression                              | 0.04807838 | 47 | 4798 | <i>zfhx4,klf1,znf451,foxo3,tfap2a,pcf12,ncoa2,atad2,coq7,zhx2,esrp2,trps1,card8,fhl2,cenpf,twist1,med1,irf8,hnf4g,trim44,galr2,bcor,zbed1,ppp3r1,cyp26b1,tnc,xrn1,smyd1,znf45,rnf6,aldh1a2,dysf,znf214,nr4a2,tsc22d3,znf362,sertad2,c1d,znf628,zfp2,rbm20,vgl13,trim25,tbrg4,tiparp,cdk8,rps15a</i> |
| Developmental cell growth                                  | 0.04807838 | 6  | 223  | <i>ptprs,mag,rnf6,map1b,pdlim5,trim46</i>                                                                                                                                                                                                                                                           |
| Oocyte development                                         | 0.04807838 | 3  | 48   | <i>foxo3,tdrd5,washc5</i>                                                                                                                                                                                                                                                                           |
| Regulation of neurogenesis                                 | 0.04807838 | 13 | 824  | <i>pcf12,brinp3,ptprs,mag,foxo3,med1,rnf6,map1b,atp8a2,pdlim5,washc5,zhx2,trim46</i>                                                                                                                                                                                                                |

1260  
1261  
1262  
1263  
1264  
1265  
1266  
1267  
1268  
1269  
1270  
1271  
1272  
1273  
1274  
1275  
1276  
1277  
1278  
1279  
1280  
1281

**Table S5. Top 5 BLAST hits for LG15 QTL.** Bolded values indicate the top hit that was used to determine the region the significant oral jaw size QTL aligned to an 18-Mb region on scaffold *c\_bro\_v1\_0\_scaf8* (8840660-27314762) in the *C. brontotheroides* reference genome that contained 3 genes (*map2k6*, *galr2*, and *grid2ip*).



| LG15<br>marker | Scaffold                | %<br>identity | Length<br>(bp) | Mismatch | Start           | End             | E-value         | Bitscore   |
|----------------|-------------------------|---------------|----------------|----------|-----------------|-----------------|-----------------|------------|
| <b>10999</b>   | <b>c_bro_v1_0_scaf8</b> | <b>97.917</b> | <b>96</b>      | <b>2</b> | <b>8840660</b>  | <b>8840755</b>  | <b>1.95E-42</b> | <b>174</b> |
| 10999          | c_bro_v1_0_scaf8        | 100           | 17             | 0        | 17544438        | 17544422        | 4.6             | 34.2       |
| 10999          | c_bro_v1_0_scaf36       | 100           | 20             | 0        | 201747          | 201728          | 0.074           | 40.1       |
| 10999          | c_bro_v1_0_scaf7        | 100           | 19             | 0        | 13795738        | 13795756        | 0.29            | 38.2       |
| 10999          | c_bro_v1_0_scaf52       | 100           | 18             | 0        | 23185857        | 23185840        | 1.2             | 36.2       |
| 10999          | c_bro_v1_0_scaf38       | 100           | 18             | 0        | 1880370         | 1880387         | 1.2             | 36.2       |
| <b>33382</b>   | <b>c_bro_v1_0_scaf8</b> | <b>100</b>    | <b>93</b>      | <b>0</b> | <b>27314670</b> | <b>27314762</b> | <b>1.97E-45</b> | <b>184</b> |
| 33382          | c_bro_v1_0_scaf8        | 93.617        | 47             | 3        | 26627380        | 26627426        | 8.05E-11        | 69.9       |
| 33382          | c_bro_v1_0_scaf8        | 93.617        | 47             | 3        | 27916662        | 27916616        | 8.05E-11        | 69.9       |
| 33382          | c_bro_v1_0_scaf8        | 95.238        | 42             | 2        | 1464518         | 1464477         | 3.18E-10        | 67.9       |
| 33382          | c_bro_v1_0_scaf8        | 95.238        | 42             | 2        | 11224060        | 11224019        | 3.18E-10        | 67.9       |

1282  
1283

1284  
1285  
1286  
1287  
1288

**Table S6.**  
**Per generation mutation rate estimation from high coverage sequencing of parents and F1 from two crosses of San Salvador Island species.**

| Cross                                                            | <i>C. variegatus</i> x<br><i>C. brontotheroides</i> |                       | <i>C. variegatus</i> x <i>C.</i><br><i>desquamator</i> |
|------------------------------------------------------------------|-----------------------------------------------------|-----------------------|--------------------------------------------------------|
|                                                                  | F1.A                                                | F1.B                  | F1.A                                                   |
| Offspring                                                        | F1.A                                                | F1.B                  | F1.A                                                   |
| Avg. coverage                                                    | 67.5X                                               | 45.1X                 | 32.7X                                                  |
| Known heterozygous sites genotype quality (GQ)                   | X>99                                                | X>99                  | X>99                                                   |
| Known heterozygous sites base quality rank sum (BaseQRankSum)    | 1.4<x<2.6                                           | 1.4<x<2.6             | 1.4<x<2.7                                              |
| Known heterozygous sites mapping quality (MQ)                    | x>54                                                | x>54                  | x>54                                                   |
| Known heterozygous sites mapping quality rank sum (MQRankSum)    | 1.6<x<1.9                                           | 1.6<x<1.9             | 1.4<x<2                                                |
| Known heterozygous sites quality by depth (QD)                   | 24<x<36                                             | 24<x<36               | 24<x<36                                                |
| Known heterozygous sites depth (DP)                              | 27 <x<77                                            | 15 < x < 54           | 12< x < 39                                             |
| Known heterozygous sites allele depth (AD)                       | 10<x<42                                             | 5<x<30                | 4< x < 21                                              |
| Known heterozygous sites read position rank sum (ReadPosRankSum) | -1.8<x<2.3                                          | 1.8<x<2.3             | 1.4<x<2.34                                             |
| Known heterozygous sites StrandOddsRatio (SOR)                   | 0.17<x<1.4                                          | 0.14<x<1.4            | 0.19<x<1.3                                             |
| Known heterozygous sites FisherStrand (FS)                       | 4.6<x<7.5                                           | 4.6<x<7.3             | 45<x<7.5                                               |
| GATK new mutation sites (bp)                                     | 9114                                                | 8936                  | 331                                                    |
| mpileup new mutation sites (bp)                                  | 14772                                               | 14182                 | 7206                                                   |
| Shared variants (bp)                                             | 20                                                  | 37                    | 9                                                      |
| Accessible genome (bp)                                           | 698887016                                           | 712364816             | 695995433                                              |
| Mutation rate estimate                                           | 1.43x10 <sup>-8</sup>                               | 2.59x10 <sup>-8</sup> | 6.46x10 <sup>-9</sup>                                  |

1289  
1290

1291  
1292  
1293  
1294  
1295

**Table S7.**  
**Parameters for selective sweep analyses.** The average coverage, composite likelihood ratio threshold based on neutral simulations, and the population size change parameters and individual used for each species.

| Species          | Average Coverage | CLR threshold | SweeD Commands                                                           |
|------------------|------------------|---------------|--------------------------------------------------------------------------|
| SSI generalist   | 28.87X           | 4.89          | -folded -strictPolymorphic -G 0.4068 -eN 5.45 181.8 -s 64                |
| SSI molluscivore | 17.37X           | 4.47          | -folded -strictPolymorphic -G 0.389 -eN 5.88 196 -s 88                   |
| SSI scale-eater  | 18.21X           | 5.28          | -folded -strictPolymorphic -G 0.218 -eN 8.11 270 -s 52                   |
| RC               | 21.04X           | 4.41          | -folded -strictPolymorphic -G 0.23 -eN 11.15 269.1 -s 34                 |
| NP               | 22.67X           | 2.28          | -folded -strictPolymorphic -G 0.198 -eN 13.35 445.07 -s 30               |
| DR               | NA               | 5.37          | -folded -strictPolymorphic -G 0.236 -eN 10.83 362.8 -s 20                |
| NCC              | 27.62X           | 5.09          | -folded -strictPolymorphic -G 0.29 -eN 8.01 374.4 -s 24                  |
| VEN              | 17.21X           | 18.05         | -folded -strictPolymorphic -G 8.87 -eN 0.086 0.345 -eN 1.077 38.78 -s 22 |

1296  
1297

1298  
1299  
1300  
1301  
1302  
1303  
1304  
1305  
1306  
1307

**Table S8. The number of introgression regions in the SSI specialists.** We determined introgressed regions of the genome as region with a  $f_d$  statistic (ranges from 0 to 1) value above the threshold found in neutral simulations with no gene flow. These introgressed regions from each donor population were then overlapped with regions of the genome with strong genetic divergence (variants with  $F_{st} \geq 0.95$ ) and signatures of a hard selective sweep ( $CLR > 5.28$  and  $> 4.47$  for scale-eaters and molluscivores respectively) to determine the number of adaptive introgression regions. These adaptive introgression regions range in size from 50-kb to 110-kb in length.

| Donor population (P3)           | $f_d$ threshold | Number of candidate introgression regions | Number of candidate adaptive introgression regions |
|---------------------------------|-----------------|-------------------------------------------|----------------------------------------------------|
| Introgression with Molluscivore |                 |                                           |                                                    |
| Rum Cay                         | 0.81            | 536                                       | 5                                                  |
| New Providence                  | 0.72            | 660                                       | 7                                                  |
| Dominican Republic              | 0.81            | 375                                       | 8                                                  |
| North Carolina                  | 0.69            | 138                                       | 0                                                  |
| Venezuela                       | 0.69            | 54                                        | 0                                                  |
| Introgression with Scale-eater  |                 |                                           |                                                    |
| Rum Cay                         | 0.81            | 385                                       | 5                                                  |
| New Providence                  | 0.72            | 645                                       | 9                                                  |
| Dominican Republic              | 0.81            | 426                                       | 11                                                 |
| North Carolina                  | 0.71            | 163                                       | 3                                                  |
| Venezuela                       | 0.69            | 15                                        | 0                                                  |

1308

1309  
1310  
1311  
1312  
1313  
1314

**Table S9.**

**Combinations of Caribbean pupfish populations used to detect signatures of introgression in San Salvador Island specialists and generalist lineages on other islands.** The *fd* statistic was used to detect introgression between combinations of P2 and P3 populations, given the tree (((P1,P2),P3),O). For this series of tests we used *C. artifrons* as the outgroup in which limited gene flow is expected to have occurred with the others.

| -                                                  | Sister group (P1)         | Introgression into (P2)   | Introgression from (P3) | Adaptive introgression regions |
|----------------------------------------------------|---------------------------|---------------------------|-------------------------|--------------------------------|
| <u>Focal introgression regions in scale-eater</u>  |                           |                           |                         |                                |
| <u>A.</u>                                          | <i>C. brontotheroides</i> | <i>C. desquamator</i>     | <i>C. laciniatus</i> NP | 11                             |
|                                                    | <i>C. brontotheroides</i> | <i>C. desquamator</i>     | <i>C. higuey</i> DR     | 8                              |
|                                                    | <i>C. brontotheroides</i> | <i>C. desquamator</i>     | <i>C. variegatus</i> NC | 4                              |
|                                                    | <i>C. brontotheroides</i> | <i>C. desquamator</i>     | <i>C. dearborni</i> VZ  | 0                              |
| <u>B.</u>                                          | <i>C. variegatus</i> SSI  | <i>C. higuey</i> DR       | <i>C. laciniatus</i> NP | 2                              |
|                                                    | <i>C. variegatus</i> SSI  | <i>C. higuey</i> DR       | <i>C. variegatus</i> NC | 3                              |
|                                                    | <i>C. variegatus</i> RC   | <i>C. higuey</i> DR       | <i>C. laciniatus</i> NP | 0                              |
|                                                    | <i>C. variegatus</i> RC   | <i>C. higuey</i> DR       | <i>C. variegatus</i> NC | 0                              |
|                                                    | <i>C. variegatus</i> SSI  | <i>C. laciniatus</i> NP   | <i>C. variegatus</i> NC | 4                              |
|                                                    | <i>C. variegatus</i> RC   | <i>C. laciniatus</i> NP   | <i>C. variegatus</i> NC | 1                              |
|                                                    | <i>C. variegatus</i> RC   | <i>C. laciniatus</i> NP   | <i>C. variegatus</i> NC | 2                              |
|                                                    | <i>C. variegatus</i> SSI  | <i>C. variegatus</i> RC   | <i>C. higuey</i> DR     | 3                              |
|                                                    | <i>C. variegatus</i> SSI  | <i>C. variegatus</i> RC   | <i>C. laciniatus</i> NP | 4                              |
|                                                    | <i>C. variegatus</i> SSI  | <i>C. variegatus</i> RC   | <i>C. variegatus</i> NC | 4                              |
| <u>Focal introgression regions in molluscivore</u> |                           |                           |                         |                                |
| <u>C.</u>                                          | <i>C. desquamator</i>     | <i>C. brontotheroides</i> | <i>C. laciniatus</i> NP | 5                              |
| -                                                  | <i>C. desquamator</i>     | <i>C. brontotheroides</i> | <i>C. higuey</i> DR     | 6                              |
| -                                                  | <i>C. desquamator</i>     | <i>C. brontotheroides</i> | <i>C. variegatus</i> NC | 2                              |
| -                                                  | <i>C. desquamator</i>     | <i>C. brontotheroides</i> | <i>C. dearborni</i> VZ  | 0                              |
| <u>D.</u>                                          | <i>C. variegatus</i> SSI  | <i>C. higuey</i> DR       | <i>C. laciniatus</i> NP | 0                              |
| -                                                  | <i>C. variegatus</i> SSI  | <i>C. higuey</i> DR       | <i>C. variegatus</i> NC | 1                              |
| -                                                  | <i>C. variegatus</i> RC   | <i>C. higuey</i> DR       | <i>C. laciniatus</i> NP | 0                              |
| -                                                  | <i>C. variegatus</i> RC   | <i>C. higuey</i> DR       | <i>C. variegatus</i> NC | 0                              |
| -                                                  | <i>C. variegatus</i> SSI  | <i>C. laciniatus</i> NP   | <i>C. variegatus</i> NC | 1                              |
| -                                                  | <i>C. variegatus</i> RC   | <i>C. laciniatus</i> NP   | <i>C. variegatus</i> NC | 0                              |
| -                                                  | <i>C. variegatus</i> RC   | <i>C. laciniatus</i> NP   | <i>C. variegatus</i> NC | 0                              |
| -                                                  | <i>C. variegatus</i> SSI  | <i>C. variegatus</i> RC   | <i>C. higuey</i> DR     | 2                              |
| -                                                  | <i>C. variegatus</i> SSI  | <i>C. variegatus</i> RC   | <i>C. laciniatus</i> NP | 1                              |
| -                                                  | <i>C. variegatus</i> SSI  | <i>C. variegatus</i> RC   | <i>C. variegatus</i> NC | 3                              |

1315  
1316  
1317  
1318

**Table S10.**

1319  
1320  
1321

**Candidate adaptive introgression regions from Rum Cay generalists (*C. variegatus*) and San Salvador Island specialists.**

| Scaffold                        | Variant Position | Start    | End      | Gene                  |
|---------------------------------|------------------|----------|----------|-----------------------|
| Introgression with Molluscivore |                  |          |          |                       |
| c_bro_v1_0_scaf11               | 12962909         | 12965001 | 13010000 | <i>shisa2, atp8a2</i> |
| c_bro_v1_0_scaf16               | 35813565         | 35765001 | 35875000 | <i>rfc4</i>           |
| c_bro_v1_0_scaf18               | 18167642         | 18150001 | 18215000 | <i>anks1a</i>         |
| c_bro_v1_0_scaf18               | 18177499         | 18150001 | 18225000 | <i>sarg</i>           |
| c_bro_v1_0_scaf52               | 19358574         | 19345001 | 19395000 | <i>fn1</i>            |
| Introgression with Scale-eater  |                  |          |          |                       |
| c_bro_v1_0_scaf1                | 15017907         | 14995001 | 15065000 | <i>rbm20</i>          |
| c_bro_v1_0_scaf5                | 28411973         | 28365001 | 28455000 | <i>gse1</i>           |
| c_bro_v1_0_scaf37               | 3586373          | 3585001  | 3650000  | <i>chrna7</i>         |
| c_bro_v1_0_scaf43               | 30358142         | 30355001 | 30405000 | <i>c1d</i>            |
| c_bro_v1_0_scaf53               | 11080970         | 11080001 | 11130000 | <i>zhx2</i>           |

1322  
1323

1324  
1325  
1326  
1327  
1328

**Table S11.**  
**Candidate adaptive introgression regions from Dominican Republic generalists (*C. higuey*) and San Salvador Island specialists.**

| Scaffold                        | Variant Position | Start    | End      | Gene                |
|---------------------------------|------------------|----------|----------|---------------------|
| Introgression with Molluscivore |                  |          |          |                     |
| c_bro_v1_0_scaf1                | 28938769         | 28935001 | 28985000 | <i>rps15a</i>       |
| c_bro_v1_0_scaf1                | 28962108         | 28935001 | 28995000 | <i>notum2</i>       |
| c_bro_v1_0_scaf1                | 28969771         | 28935001 | 28995000 | <i>coq7</i>         |
| c_bro_v1_0_scaf7                | 12326193         | 12305001 | 12375000 | <i>smek1</i>        |
| c_bro_v1_0_scaf7                | 12606143         | 12605001 | 12685000 | <i>otof</i>         |
| c_bro_v1_0_scaf11               | 11256440         | 11210001 | 11295000 | <i>ube2w</i>        |
| c_bro_v1_0_scaf18               | 18167642         | 18135001 | 18225000 | <i>anks1a,sarg</i>  |
| c_bro_v1_0_scaf19               | 6430544          | 6410001  | 6465000  | <i>trim44</i>       |
| Introgression with Scale-eater  |                  |          |          |                     |
| c_bro_v1_0_scaf5                | 28411973         | 28385001 | 28450000 | <i>gse1</i>         |
| c_bro_v1_0_scaf8                | 19759133         | 19735001 | 19790000 | <i>map2k6</i>       |
| c_bro_v1_0_scaf18               | 28961523         | 28915001 | 29010000 | <i>itga5</i>        |
| c_bro_v1_0_scaf19               | 7822448          | 7815001  | 7870000  | <i>nap114</i>       |
| c_bro_v1_0_scaf34               | 25414453         | 25400001 | 25460000 | <i>cadps</i>        |
| c_bro_v1_0_scaf34               | 26069290         | 26020001 | 26115000 | <i>srgap3</i>       |
| c_bro_v1_0_scaf37               | 3700741          | 3685001  | 3750000  | <i>trim46</i>       |
| c_bro_v1_0_scaf44               | 12541185         | 12540001 | 12620000 | <i>kcnk2, cenpf</i> |
| c_bro_v1_0_scaf44               | 24564920         | 24540001 | 24620000 | <i>gpm6a</i>        |
| c_bro_v1_0_scaf53               | 18998120         | 18990001 | 19045000 | <i>hdac9b</i>       |
| c_bro_v1_0_scaf53               | 20294941         | 20245001 | 20330000 | <i>steap4</i>       |

1329  
1330

1331  
1332  
1333

**Table S12. Candidate adaptive introgression regions from New Providence Island generalists (*C. laciniatus*) and San Salvador Island specialists.**

| Scaffold                        | Variant Position | Start    | End      | Gene                 |
|---------------------------------|------------------|----------|----------|----------------------|
| Introgression with Molluscivore |                  |          |          |                      |
| c_bro_v1_0_scaf1                | 29209555         | 29160001 | 29250000 | <i>gga1</i>          |
| c_bro_v1_0_scaf1                | 29241942         | 29195001 | 29250000 | <i>klf1</i>          |
| c_bro_v1_0_scaf7                | 12326193         | 12300001 | 12375000 | <i>smek1</i>         |
| c_bro_v1_0_scaf7                | 12628199         | 12610001 | 12670000 | <i>otof</i>          |
| c_bro_v1_0_scaf24               | 20486354         | 20470001 | 20540000 | <i>cyp26b1</i>       |
| c_bro_v1_0_scaf33               | 12634285         | 12590001 | 12655000 | <i>bri3bp, wdr31</i> |
| c_bro_v1_0_scaf47               | 16145704         | 16110001 | 16195000 | <i>ttc33</i>         |
| Introgression with Scale-eater  |                  |          |          |                      |
| c_bro_v1_0_scaf5                | 27882801         | 27845001 | 27900000 | <i>tcf12</i>         |
| c_bro_v1_0_scaf7                | 12604722         | 12555001 | 12620000 | <i>otof</i>          |
| c_bro_v1_0_scaf11               | 9503186          | 9500001  | 9550000  | <i>prlh</i>          |
| c_bro_v1_0_scaf11               | 11975348         | 11930001 | 12010000 | <i>ncoa2</i>         |
| c_bro_v1_0_scaf16               | 32982520         | 32950001 | 33030000 | <i>crocc</i>         |
| c_bro_v1_0_scaf18               | 28961523         | 28915001 | 28970000 | <i>itga5</i>         |
| c_bro_v1_0_scaf37               | 8265887          | 8220001  | 8315000  | <i>mylipa</i>        |
| c_bro_v1_0_scaf43               | 30297117         | 30250001 | 30325000 | <i>ppp3r1</i>        |
| c_bro_v1_0_scaf53               | 20832687         | 20830001 | 20880000 | <i>galnt1</i>        |

1334  
1335



1336  
1337  
1338  
1339

**Table S13. Candidate adaptive introgression regions from North Carolina Coast generalists (*C. variegatus*) and San Salvador Island specialists.**

| Scaffold                       | Variant Position | Start    | End      | Gene               |
|--------------------------------|------------------|----------|----------|--------------------|
| Introgression with Scale-eater |                  |          |          |                    |
| c_bro_v1_0_scaf1               | 28962108         | 28945001 | 28995000 | <i>notum2,coq7</i> |
| c_bro_v1_0_scaf1               | 38350857         | 38330001 | 38400000 | <i>gpr83</i>       |
| c_bro_v1_0_scaf34              | 32388612         | 32380001 | 32440000 | <i>eya2</i>        |

1340  
1341

1342  
1343  
1344  
1345  
1346

**Table S14.**  
**Selective sweep ages on San Salvador Island.** 95% high posterior density region of the posterior distribution of sweep ages of focal regions in scale-eater and molluscivore genomes estimated using McSwan (48).

| Gene                | Trait              | Scaffold          | Position Start | Position Stop | Region Size | 95% HPD Lower | 95% HPD Upper |
|---------------------|--------------------|-------------------|----------------|---------------|-------------|---------------|---------------|
| Scale-eater         |                    |                   |                |               |             |               |               |
| <i>cfap20</i>       | habitat preference | c_bro_v1_0_scaf37 | 5000841        | 5017240       | 16399       | 6747.04       | 8490.23       |
| <i>prlh</i>         | habitat preference | c_bro_v1_0_scaf11 | 9200146        | 9276987       | 76841       | 6594.56       | 9210.36       |
| <i>card8</i>        | pigmentation       | c_bro_v1_0_scaf46 | 1451011        | 1663431       | 212420      | 973.64        | 5097.36       |
| <i>kcnk2, cenpf</i> | trophic morphology | c_bro_v1_0_scaf44 | 12227155       | 12305895      | 78740       | 2936.44       | 3966.91       |
| <i>smyd1</i>        | trophic morphology | c_bro_v1_0_scaf39 | 1643098        | 1647708       | 4610        | 3054.91       | 6030.54       |
| <i>tcf12</i>        | trophic morphology | c_bro_v1_0_scaf5  | 27975725       | 28016276      | 40551       | 1607.22       | 5119.88       |
| <i>twist1</i>       | trophic morphology | c_bro_v1_0_scaf53 | 18953132       | 19092361      | 139229      | 1636.34       | 3413.14       |
| <i>itga5</i>        | trophic morphology | c_bro_v1_0_scaf18 | 28040450       | 28049258      | 8808        | 1697.39       | 2357.06       |
| Molluscivore        |                    |                   |                |               |             |               |               |
| <i>ext1</i>         | trophic morphology | c_bro_v1_0_scaf26 | 162903         | 230930        | 68027       | 814.01        | 1060.49       |
| <i>tiparp</i>       | trophic morphology | c_bro_v1_0_scaf21 | 33602383       | 33606685      | 4302        | 3353.84       | 5003.16       |
| <i>cyp26b1</i>      | trophic morphology | c_bro_v1_0_scaf24 | 20527588       | 20602663      | 75075       | 1447.58       | 4567.30       |

1347  
1348

1349  
1350  
1351  
1352  
1353  
1354  
1355  
1356  
1357  
1358  
1359  
1360  
1361  
1362  
1363  
1364  
1365  
1366  
1367  
1368  
1369  
1370  
1371  
1372  
1373  
1374  
1375  
1376  
1377  
1378  
1379  
1380  
1381  
1382  
1383  
1384  
1385  
1386  
1387  
1388  
1389  
1390  
1391  
1392  
1393  
1394

#### **Data S1.**

***Cyprinodon* pupfish sampling information.** The pond/lake names, localities, island, country, and species names, and individual codes of the pupfish individuals used in this study.

#### **Data S2.**

**San Salvador Island scale-eater candidate variants.** The candidate scale-eater variants that were nearly-fixed ( $F_{st} > 0.95$ ) and in a region with a signature of a hard selective sweep and the genes within 20-kb of them.

#### **Data S3.**

**San Salvador Island molluscivore candidate variants.** The candidate molluscivore variants that were nearly-fixed ( $F_{st} > 0.95$ ) and in a region with a signature of a hard selective sweep and the genes within 20-kb of them.

#### **Data S4.**

**Differentially expressed genes at 2 dpf.** The gene names and  $P$ -values of genes that were found to be significantly differential expressed ( $FDR > 0.05$ ) between scale-eaters and molluscivores at the 2 days post-fertilization larval stage in a previous study (36).

#### **Data S5.**

**Differentially expressed genes at 8 dpf.** The gene names and  $P$ -values of genes that were found to be significantly differential expressed ( $FDR > 0.05$ ) between scale-eaters and molluscivores at the 8 days post-fertilization larval stage in a previous study (36).

#### **Data S6.**

**SSI GWAS trait measurements.** Trait values of standard length, lower oral jaw size, nasal protrusion distance, and caudal fin pigmentation measured across the three species of San Salvador Island radiation to include in a GWAS for candidate variants underlying these traits.

#### **Data S7**

**Top genomic regions associated with lower oral jaw size in a GWAS of SSI species.**

Regions in which all the variants within a 20-kb windows had a summed PIP score that was in the 99<sup>th</sup> percentile of all summed PIP scores for association with lower oral jaw size across 10 independent runs of Bayesian linear mixed model implemented in GEMMA (37).

#### **Data S8.**

**Top genomic regions associated with lower caudal fin pigmentation in a GWAS of SSI**

**species.** Regions in which all the variants within a 20-kb windows had a summed PIP score that was in the 99<sup>th</sup> percentile of all summed PIP scores for association with caudal fin pigmentation across 10 independent runs of Bayesian linear mixed model implemented in GEMMA (37).

#### **Data S9.**

**Top genomic regions associated with lower maxillary nasal protrusion in a GWAS of SSI**

**species.** Regions in which all the variants within a 20-kb windows had a summed PIP score that

1395 was in the 99<sup>th</sup> percentile of all summed PIP scores for association with maxillary nasal  
1396 protrusion across 10 independent runs of Bayesian linear mixed model implemented in  
1397 GEMMA.  
1398  
1399
